# Supplementary material
Source: PubMed Central journal article supplement (PMC8822996)
Supplement: NIHMS1763303-supplement-Supplement__2_.pdf [file NIHMS1763303-supplement-Supplement__2_.pdf]

## Supplementary Appendix

This appendix has been provided by the authors to give readers additional information about their work.

Supplement to: Inker LA, Eneanya ND, Coresh J, et al. New creatinine- and cystatin C–based equations to estimate GFR without race. *N Engl J Med* 2021;385:1737-49. DOI: [10.1056/NEJMoa2102953](https://doi.org/10.1056/NEJMoa2102953)

## Table of Contents

|                                                                                                                                                                                                                              |    |
|------------------------------------------------------------------------------------------------------------------------------------------------------------------------------------------------------------------------------|----|
| <b>Collaborators</b> .....                                                                                                                                                                                                   | 3  |
| <b>Funding</b> .....                                                                                                                                                                                                         | 4  |
| <b>Supplemental Methods</b> .....                                                                                                                                                                                            | 7  |
| <b>A. Development of equations to estimate GFR and evaluation of their performance compared to measured GFR</b> .....                                                                                                        | 7  |
| <b>B. Estimation of prevalence of chronic kidney disease in the United States</b> .....                                                                                                                                      | 11 |
| <b>Figures and Tables</b> .....                                                                                                                                                                                              | 12 |
| <b>Figure S1:</b> Flow diagram of the CKD-EPI development and validation datasets .....                                                                                                                                      | 12 |
| <b>Figure S2:</b> Distribution of measured GFR and age by sex and race groups for the development and validation datasets .....                                                                                              | 13 |
| a. Distribution of measured GFR.....                                                                                                                                                                                         | 13 |
| b. Distribution of age .....                                                                                                                                                                                                 | 14 |
| <b>Figure S3:</b> Estimated GFR using current and new equations for simulated patients .....                                                                                                                                 | 15 |
| a. Creatinine.....                                                                                                                                                                                                           | 15 |
| b. Creatinine-Cystatin C .....                                                                                                                                                                                               | 16 |
| <b>Figure S4:</b> Comparison of measured vs estimated GFR by race groups across alternative GFR estimating equations in development dataset .....                                                                            | 17 |
| <b>Figure S5:</b> Performance for weighted blended AS equations in 2009 and 2012 development datasets .....                                                                                                                  | 18 |
| <b>Figure S6:</b> Performance of Current and New Equations compared to directly measured GFR in the 2021 Validation Dataset, Overall and by Race Groups .....                                                                | 19 |
| <b>Figure S7:</b> Comparison of measured vs estimated GFR by race groups across alternative GFR estimating equations in the 2021 validation dataset, calibrated for possible variation in mGFR measurement methods .....     | 20 |
| <b>Figure S8:</b> Performance of Current and New Equations compared to directly measured GFR in the 2021 Validation Dataset, Overall and by Race Groups, calibrated for possible variation in mGFR measurement methods ..... | 21 |
| <b>Figure S9:</b> Performance for weighted blended AS eGFR equations in 2021 validation dataset .....                                                                                                                        | 22 |
| <b>Figure S10:</b> Performance for current vs new equations in 2021 and 2009 validation datasets in subgroups as defined by eGFR, age, sex, and BMI .....                                                                    | 23 |
| a. Performance of eGFR creatinine by eGFR subgroups in 2021 external validation.....                                                                                                                                         | 24 |
| b. Performance of eGFR creatinine-cystatin C by eGFR subgroups in 2021 external validation.....                                                                                                                              | 25 |
| c. Performance of eGFR creatinine by eGFR subgroups in 2009 external validation.....                                                                                                                                         | 26 |
| d. Performance of eGFR creatinine by age subgroups in 2021 external validation .....                                                                                                                                         | 27 |
| e. Performance of eGFR creatinine-cystatin C by age subgroups in 2021 external validation.....                                                                                                                               | 28 |
| f. Performance of eGFR creatinine by age subgroups in 2009 external validation .....                                                                                                                                         | 29 |
| g. Performance of eGFR creatinine by BMI subgroups in 2021 external validation.....                                                                                                                                          | 30 |
| h. Performance of eGFR creatinine-cystatin C by BMI subgroups in 2021 external validation.....                                                                                                                               | 31 |
| i. Performance of eGFR creatinine by BMI subgroups in 2009 external validation.....                                                                                                                                          | 32 |
| j. Performance of eGFR creatinine by sex subgroups in 2021 external validation.....                                                                                                                                          | 33 |
| k. Performance of eGFR creatinine-cystatin C by sex subgroups in 2021 external validation .....                                                                                                                              | 34 |
| l. Performance of eGFR creatinine by sex subgroups in 2009 external validation.....                                                                                                                                          | 35 |
| <b>Figure S11:</b> Distribution of the estimated glomerular filtration rate (eGFR) equations as calculated in National Health and Nutrition Examination Survey (NHANES 1999-2002) .....                                      | 36 |
| a. Distribution of eGFR creatinine equations .....                                                                                                                                                                           | 36 |
| b. Distribution of eGFR cystatin C and creatinine-cystatin C equations.....                                                                                                                                                  | 37 |

|                                                                                                                                                                                                                             |    |
|-----------------------------------------------------------------------------------------------------------------------------------------------------------------------------------------------------------------------------|----|
| <b>Table S1:</b> Methods to measure GFR in each study in the 2009 and 2012 development and 2021 External Validation Datasets                                                                                                | 38 |
| <b>Table S2:</b> Equations to estimate GFR with their filtration markers and demographics, and datasets used for their development and validation                                                                           | 39 |
| <b>Table S3:</b> Race group ascertainment by study                                                                                                                                                                          | 40 |
| <b>Table S4:</b> Baseline characteristics, National Health and Nutrition Examination Survey                                                                                                                                 | 46 |
| <b>Table S5:</b> Race ascertainment in NHANES and Chronic Kidney Disease-Prognosis Consortium                                                                                                                               | 47 |
| <b>Table S6:</b> Characteristics of the creatinine 2009 development and internal validation dataset by study                                                                                                                | 48 |
| <b>Table S7:</b> Characteristics of the cystatin 2012 development and internal validation dataset by study                                                                                                                  | 51 |
| <b>Table S8:</b> Characteristics of the 2021 validation dataset by study                                                                                                                                                    | 55 |
| <b>Table S9:</b> Characteristics of the 2009 validation dataset by study                                                                                                                                                    | 59 |
| <b>Table S10:</b> Current and new CKD-EPI equations for estimating GFR on the natural scale expressed for specified sex, serum creatinine or serum cystatin C                                                               | 64 |
| <b>Table S11:</b> Estimated GFR using current and new equations for simulated patients at different ages, sex and creatinine or cystatin C levels. Panel a: creatinine levels; Panel b: creatinine and cystatin C equations | 66 |
| <b>Table S12:</b> Performance of current and new creatinine GFR estimating equations in development dataset                                                                                                                 | 68 |
| a. 2009 development dataset                                                                                                                                                                                                 | 68 |
| b. Performance of new eGFRcr (AS) equation weighted for proportion of Black individuals in the 2009 development dataset                                                                                                     | 69 |
| c. Performance of current and new creatinine-cystatin C GFR estimating equations in the 2012 cystatin C development dataset                                                                                                 | 70 |
| d. Performance of new eGFRcr-cys (AS) equation weighted for proportion of Black individuals in the 2012 development dataset                                                                                                 | 71 |
| <b>Table S13:</b> Performance in validation dataset                                                                                                                                                                         | 72 |
| a. Performance in 2021 Validation dataset for equations for current vs new equations                                                                                                                                        | 72 |
| b. Performance in 2021 Validation Dataset for equations adjusting for possible variation in GFR measurement methods                                                                                                         | 73 |
| c. Performance in 2021 Validation Dataset for equations weighted for proportion of Black individuals in the development dataset                                                                                             | 74 |
| d. Performance in 2021 validation dataset of alternative GFR estimating equations developed by other research groups                                                                                                        | 75 |
| e. Performance in 2009 external validation dataset of current vs new creatinine equations                                                                                                                                   | 76 |
| f. Performance in 2012 external validation dataset of current vs new creatinine, cystatin and creatinine-cystatin C equations                                                                                               | 77 |
| <b>Table S14:</b> Agreement and disagreement between mGFR and eGFR categories                                                                                                                                               | 78 |
| <b>Table S15:</b> Prevalence of total CKD and CKD stages, defined with eGFR and persistent ACR, overall and stratified by race groups                                                                                       | 79 |
| <b>Table S16:</b> Prevalence of KDIGO GFR stages, overall and stratified by race                                                                                                                                            | 81 |
| <b>Supplemental References</b>                                                                                                                                                                                              | 83 |

## Collaborators

**The Age, Gene/Environment Susceptibility Reykjavik study (AGES-RS):** Margret B Andresdottir, Hrefna Gudmundsdottir, Olafur S Indridason and Runolfur Palsson; **Assessing Long Term Outcomes in Living Kidney Donors (ALTOLD):**, Bertram Kasiske, Matthew Weir, Todd Pesavento, Roberto Kalil; **Chronic Renal Insufficiency Cohort (CRIC):** Harold Feldman, Amanda Anderson, Alan Go, Chi-yuan Hsu; **Consortium for Radiologic Imaging Studies of Polycystic Kidney Disease (CRISP):** Arlene B Chapman, Douglas P. Landsittel, Michal Mrug, Alan SL Yu; **Diabetes Control and Complications Trial (DCCT):** Michael Steffes, Barbara H. Braffett; **study of people living with HIV:** Christina Wyatt, Zipporah Krishnasami, James Hellinger; **Multicenter AIDS Cohort Study (MACS), now the MACS/WIHS Combined Cohort Study (MWCCS):** Alison Abraham; **Mayo Clinic:** John C. Lieske; **Multi Ethnic Study of Atherosclerosis (MESA):** Tariq Shafi, Wendy Post, Peter Rossing; **NephroTest:** Jerome Rossert, Benedicte Stengel; **Prevent Kidney Function Loss (PERL):** Andrzej Galecki, Catherine Spino, Michael Mauer and Amy Karger; **Rein Angiotensin System Study (RASS):** Bernard Zinman, Ronald Klein; **Steno Diabetes Center study:** Hans-Henrik Parving, Peter Rossing; **Diabetes Control and Complications Trial (DRDS)** Helen C. Looker, William C. Knowler **Baylor University Medical Center:** Goran B. Klintmalm; **Dallas Nephrology Associates (DNA):** Ruben Velez; **National Health and Nutrition Examination Survey (NHANES):** Elizabeth Selvin, Dan Wang

## Funding

The funders had no role in study design, data collection, analysis, reporting, or the decision to submit for publication.

### Support for CKD-EPI GFR

The measurements and analyses were supported by grants from the National Institute of Diabetes and Digestive and Kidney Diseases grant R01DK097020 “Estimating GFR from a Panel of Endogenous Filtration Markers” to Tufts Medical Center.

**AASK:** Support from NIDDK U01 DK045388 and the NCMHHD M01 RR00071

**AGES:** The AGES-Kidney study is supported by grants from the National Institute of Diabetes and Digestive and Kidney Diseases (R01-DK082447 and supplement 01A1S1 to A.S.L.)

**ALTOLD:** study was funded by the National Institutes of Health (NIH) under the cooperative agreement U01 DK066013. The NIH participated in the interpretation of data, writing the report, and the decision to submit the report for publication. This study was also supported by the Minneapolis Medical Research Foundation, Minneapolis, MN, which did not participate in any aspect of the study.

**CCFP:** support from the National Institute of Diabetes and Digestive and Kidney Diseases for U01 DK053869/DK/NIDDK NIH HHS

**CRIC:** Funding for the CRIC Study was obtained under a cooperative agreement from National Institute of Diabetes and Digestive and Kidney Diseases (U01DK060990, U01DK060984, U01DK061022, U01DK061021, U01DK061028, U01DK060980, U01DK060963, U01DK060902 and U24DK060990). In addition, this work was supported in part by: the Perelman School of Medicine at the University of Pennsylvania Clinical and Translational Science Award NIH/NCATS UL1TR000003, Johns Hopkins University UL1 TR-000424, University of Maryland GCRC M01 RR-16500, Clinical and Translational Science Collaborative of Cleveland, UL1TR000439 from the National Center for Advancing Translational Sciences (NCATS) component of the National Institutes of Health and NIH roadmap for Medical Research, Michigan Institute for Clinical and Health Research (MICHR) UL1TR000433, University of Illinois at Chicago CTSA UL1RR029879, Tulane COBRE for Clinical and Translational Research in Cardiometabolic Diseases P20 GM109036, Kaiser Permanente NIH/NCRR UCSF-CTSI UL1 RR-024131, Department of Internal Medicine, University of New Mexico School of Medicine Albuquerque, NM R01DK119199

**CRISP:** The CRISP study is supported by cooperative agreements from the National Institute of Diabetes and Digestive and Kidney Diseases (NIDDK) of the National Institutes of Health (DK056943, DK056956, DK056957, DK056961), and by R01 DK113111. This study was also supported in part by the NIDDK through P30 grants to the Kansas PKD Research and Translation Core Center (DK106912) and the Mayo Translational PKD Center (DK090728), by the National Center for Research Resources General Clinical Research Centers at each institution (RR000039, Emory University; RR00585, Mayo College of Medicine; RR23940, Kansas University Medical Center; RR000032, University of Alabama at Birmingham), and the National Center for Advancing Translational Sciences Clinical and Translational Science Awards at each institution (RR025008 and TR000454, Emory; RR024150 and TR000135, Mayo College of Medicine; RR033179 and TR000001, Kansas University Medical Center; RR025777, TR000165 and TR001417, University of Alabama at Birmingham; RR024153 and TR000005, University of Pittsburgh School of Medicine). The investigators are indebted to the study coordinators in CRISP.

**CSG:** Supported by grants from the Public Health Service (5 R01-DK 39908, 5 R01-DK 39826, MO1-RR00030, MO1-RR00034, MO1-RR00036, MO1-RR00051, MO1-RR00058, MO1-RR00059, and MO1-RR00425) and by the Bristol-Myers Squibb Pharmaceutical Research Institute (Princeton, N.J.)

**DCCT:** The DCCT/EDIC has been supported by U01 Cooperative Agreement Grants (1982–1993, 2011–2017, 2017–2022) and contracts (1982–2012) with the Division of Diabetes Endocrinology and Metabolic Diseases of the National Institute of Diabetes and Digestive and Kidney Diseases (current grant numbers U01 DK094176 and U01 DK094157), and through support by the National Eye Institute, the National Institute of Neurological Disorders and Stroke, the Genetic Clinical Research Centers Program (1993–2007), and the Clinical Translational Science Center Program (2006–present), Bethesda, MD. The following industry contributors have had no role in the DCCT/EDIC study but have provided free or discounted supplies or equipment to support participants' adherence to the study: Abbott Diabetes Care (Alameda, CA); Animas (Westchester, PA); Bayer Diabetes Care (North America Headquarters, Tarrytown, NY); Becton, Dickinson and Company (Franklin Lakes, NJ); CanAm (Atlanta, GA); Eli Lilly (Indianapolis, IN); Extend Nutrition (St. Louis, MO); Insulet Corporation (Bedford, MA); LifeScan (Milpitas, CA); Medtronic Diabetes (Minneapolis, MN); Nipro Home Diagnostics (Ft. Lauderdale, FL); Nova Diabetes Care (Billerica, MA); Omron (Shelton, CT); Perrigo Diabetes Care (Allegan, MI); OmniPod Insulin Management System (Bedford, MA); Roche Diabetes Care (Indianapolis, IN); and Sanofi-Aventis (Bridgewater, NJ).

**DRDS:** DRDS was supported by contracts (N01-DK-6-2285 and N01-DK-7-2291) with the National Institute of Diabetes and Digestive and Kidney Diseases and by the Intramural Research Program of the National Institute of Diabetes and Digestive and Kidney Diseases

**GRECO:** no funding to report

**HIV study:** The study including people living with HIV was supported by Gilead Sciences, Inc. under an investigator-initiated protocol NCRR L1RR025752 and by the National Institutes of Health/ National Center for Advancing Translational Sciences UL1 RR025752 (Tufts Medical Center), UL1 RR029887 (Mount Sinai School of Medicine) and UL1 RR025777 (University of Alabama at Birmingham).

**Lund:** Supported by grants from the Swedish Research Council (Grant 05196) and from the Medical Faculty of the University of Lund.

**MACS:** Data included in this study were collected by the Multicenter AIDS Cohort Study (MACS), now the MACS/WIHS Combined Cohort Study (MWCCS), which is supported by the National Institutes of Health, Baltimore CRS, U01-HL146201; Pittsburgh CRS, U01-HL146208; Chicago-Northwestern CRS, U01-HL146240; Los Angeles CRS, U01-HL146333; Data Analysis and Coordination Center U01-HL146193. Full acknowledgement may be found here: <https://statepi.jhsph.edu/mwccs/acknowledgements/>

**Mayo Clinic:** By a National Research Service Award (T32 DK07013) and grants from the Mayo Foundation, Mayo Clinic, Rochester, Minnesota

**MDRD:** Support from NIDDK U01 DK35073

**MESA:** This research was supported by contracts 75N92020D00001, HHSN268201500003I, N01-HC-95159, 75N92020D00005, N01-HC-95160, 75N92020D00002, N01-HC-95161, 75N92020D00003, N01-HC-95162, 75N92020D00006, N01-HC-95163, 75N92020D00004, N01-HC-95164, 75N92020D00007, N01-HC-95165, N01-HC-95166, N01-HC-95167, N01-HC-95168 and N01-HC-95169 from the National Heart, Lung, and Blood Institute, and by grants UL1-TR-000040, UL1-TR-001079, and UL1-TR-001420 from the National Center for Advancing Translational Sciences (NCATS). The authors thank the other investigators, the staff, and the

participants of the MESA study for their valuable contributions. A full list of participating MESA investigators and institutions can be found at <http://www.mesa-nhlbi.org>.

**NephroTest:** Supported by the following grants: INSERM GIS-IReSP AO 8113LS TGIR, French Ministry of Health AOM 09114, INSERM AO 8022LS, Agence de la Biomedecine R0 8156LL, AURA and Roche 2009-152-447G

**PERL:** study was funded by grants from the National Institute of Diabetes and Digestive and Kidney Diseases (NIDDK) (R03-DK-094484, R34-DK-097808, and UC4-DK-101108) and JDRF (17-2012-377). The iohexol used for the iGFR measurements was a generous gift of GE Healthcare. Research was supported by the National Center for Advancing Translational Sciences, the NIDDK, and the National Institute on Aging (Claude Pepper Center grants) under award numbers P30-DK-036836,UL1-TR-002494, P30-DK-020572,UL1-TR-001422, UL1-TR-002556, UL1-TR-002319, UL1-TR-001105,UL1-TR-002319-02, P30-AG-08808,and P30-AG-02482

**RASS:** funded by research grants from the NIDDK (NIH) (#DK51975); Merck & Co., USA; Merck Frosst, Canada; and Canadian Institutes of Health Research (CIHR) (#DCT 14281) Canada. RASS was supported in part by the University of Minnesota General Clinical Research Center (GCRC), M01-RR00400 National Center for Research Resources, National Institutes of Health.

**STENO:** no funding to report

**UMN Donors:** no funding to report

**Support for NHANES:** National Center for Health Statistics, United States Center for Disease Control and Prevention

## Supplemental Methods

### A. Development of equations to estimate GFR and evaluation of their performance compared to measured GFR

#### *Chronic Kidney Disease-Epidemiology Collaboration (CKD-EPI)*

CKD-EPI is a research group funded by the National Institute of Diabetes, Digestive and Kidney Disease (NIDDK) to address challenges in the study and care of CKD, including development and validation of improved GFR estimating equations by pooling data from research studies and clinical populations (hereafter referred to as “studies”). The design and studies have been previously described and are briefly reviewed here.<sup>1-3</sup> Full information can be found here <https://www.tuftsmedicalcenter.org/research-clinical-trials/institutes-centers-labs/chronic-kidney-disease-epidemiology-collaboration/overview>

The first and last authors are co-directors of CKD-EPI. They drafted the first draft and subsequent revisions with the participation of a subgroup of the authors (Crews, Coresh, Eneanya, Grams, Gutierrez and Powe). Hocine Tighiouart performed the analyses under the direction of the first and last authors. The remainder of the writing group reviewed the near to final draft and provided input. All authors approved the final version. The first, fourth, and last authors take responsibility for all the analyses and directed the development and validation of the GFR estimating equations. Drs. Coresh and Selvin and analyst Dan Wang directed the NAHANES analyses.

#### **Data sources**

The institutional review boards of all participating institutions approved each study and Tufts Medical Center’s institutional review board approved the current analysis.

Collaborators provided data from research studies and clinical populations. **Figure S1** and **Table S2** shows the division of these studies into development and external validation for the CKD-EPI 2009 creatinine (eGFR<sub>cr</sub>) equation, CKD-EPI 2012 cystatin C (eGFR<sub>cys</sub>) and creatinine-cystatin C equations (eGFR<sub>cr-cys</sub>) and the CKD-EPI 2021 equations described here. GFR was measured using urinary or plasma clearance of exogenous filtration markers (**Table S1**). For development of new equations, we used existing development populations: CKD-EPI 2009 for eGFR<sub>cr</sub> (**Table S6**, 10 studies, 8254 participants) and CKD-EPI 2012 for eGFR<sub>cys</sub> and eGFR<sub>cr-cys</sub> (**Table S7**, 13 studies, 5352 participants). For external validation of all equations, we used a new population (CKD-EPI 2021) consisting of CKD-EPI 2012 external validation studies and new studies (**Table S8** 12 studies, 4050 participants). Separately, for external validation of eGFR<sub>cr</sub>, we also used CKD-EPI 2009 external validation population, as it is larger than CKD-EPI 2021. Race was self-reported by participants in most studies (**Table S3**).

Information on race and ethnicity groups were provided in the original study data. In our past work, we had explored use of 2-level variable for race (Black vs. White and other) and as a 4-level variable (Black, Asian, Native American and Hispanic vs. White and other). Our main publications and equations used in practice included the 2-level variable as we had insufficient representation from the other groups to have definitive results and our analyses within these small sample sizes did not demonstrate large effects.<sup>4</sup> Categorization of racial groups in this study was consistent with previous studies. We recognize the broad diversity within racial groups and in future studies, categorization can reflect this important concept.

#### **Laboratory methods**



Methods for measurement and standardization of creatinine, cystatin C and GFR have been previously reported.<sup>1,2,5,6,7</sup> We calibrated serum creatinine assays or measured serum creatinine on the Roche enzymatic method (Roche-Hitachi P-Module instrument with Roche Creatininase Plus assay, Hoffman-La Roche, Ltd., Basel, Switzerland), traceable to National Institute Standardized Technology (NIST) creatinine standard reference material 967.<sup>7</sup> We calibrated serum cystatin C assays or measured serum cystatin C on the Siemens Dade Behring Nephelometer, traceable to International Federation for Clinical Chemists (IFCC) Working Group for the Standardization of Serum Cystatin C and the Institute for Reference Materials and Measurements (IRMM) certified reference materials.<sup>8,9</sup>

### **Development and Validation of Equations**

Our goal was to compare the current approach to guideline-recommended CKD-EPI creatinine, cystatin C and creatinine-cystatin C equations (hereafter referred to as “current equations”), to two new approaches for GFR estimation that do not require race (hereafter referred to as “new equations”).<sup>1,2</sup>

**Current models:** As we have previously described, CKD-EPI equations are modeled using least squares linear regression to relate log transformed measured GFR to log-transformed filtration markers, age, sex and race with two slope splines for creatinine and cystatin C.<sup>1,2</sup> The splines are two phase linear splines on the log scale. For creatinine, the knot is at 0.7 mg/dl for women and 0.9 mg/dl for men. For cystatin, the knot is at 0.8 mg/l. The mathematical form of the joint model that estimates log transformed mGFR from log serum creatinine, log serum cystatin, age, sex and race is

$$\begin{aligned} \log(\text{mGFR}) &= \log \mu + \alpha_1 \log\{\min(\text{Scr}/\kappa, 1)\} + \alpha_2 \log\{\max(\text{Scr}/\kappa, 1)\} \\ &\quad + \beta_1 \log\{\min(\text{Scys}/0.8, 1)\} + \beta_2 \log\{\max(\text{Scys}/0.8, 1)\} \\ &\quad + \{\log(\lambda) \times \text{Age}\} + \{\log(\psi) \times \text{Female}\} + \{\log(\phi) \times \text{Black}\} + \epsilon \quad (1) \\ &= f(\text{Scr}, \text{Scys}, \text{Age}, \text{Female}, \text{Black}; \theta) + \epsilon \end{aligned}$$

The knot point  $\kappa$  for serum creatinine is set to 0.7 if female and 0.9 if male. In log transformed models,  $\log \mu$  is the intercept,  $\alpha_1$  and  $\alpha_2$  are the coefficients for log serum creatinine below and above the serum creatinine knot point;  $\beta_1$  and  $\beta_2$  are the coefficients for log serum cystatin C below above the serum cystatin C knot point. In addition,  $\log(\lambda)$  is the coefficient for age,  $\log(\psi)$  is the coefficient for female and  $\log(\phi)$  is the coefficient for Black race. Further, Female = 1 if the person is female and 0 otherwise; Black = 1 if the person is a Black individual and 0 otherwise. In the final equation, the symbol  $\theta$  represents the full set of parameters  $(\mu, \alpha_1, \alpha_2, \kappa, \beta_1, \beta_2, \lambda, \psi, \phi)$ .

**Table S2** shows the variables included in the current regression models based serum creatinine without serum cystatin C, serum cystatin C without serum creatinine, and serum creatinine and serum cystatin jointly:

1. The CKD-EPI 2009 Creatinine model includes coefficients for the two creatinine splines, age, sex and race.
2. The CKD-EPI 2012 Cystatin C model includes coefficients for the two cystatin C splines, age, and sex
3. The CKD-EPI 2012 Creatinine-Cystatin C model includes coefficients for the two creatinine splines, the two cystatin C splines, age, sex and race

Each of these models can be expressed in the framework of **Equation 1**, where the coefficients  $\beta_1$  and  $\beta_2$  are set to 0 for the CKD-EPI 2009 creatinine model, the coefficients  $\alpha_1$ ,  $\alpha_2$ , and  $\phi$  are set to 0 for the CKD-EPI 2012 serum cystatin model, and all coefficients are included for the CKD-EPI 2012 creatinine-cystatin C model. The remaining non-zero coefficients differ between the models as needed to provide least squares estimation of  $\log(\text{mGFR})$ .

For the purposes of computing estimated GFR, the regression expression on the right hand side of equation (1) is exponentiated, leading to estimating equations of the form:

$$\text{eGFR} = \mu \times \min\left(\frac{\text{Scr}}{\kappa}, 1\right)^{\alpha_1} \times \max\left(\frac{\text{Scr}}{\kappa}, 1\right)^{\alpha_2} \times \min\left(\frac{\text{Scys}}{0.8}, 1\right)^{\beta_1} \times \max\left(\frac{\text{Scys}}{0.8}, 1\right)^{\beta_2} \times \lambda^{\text{Age}} \times \psi \text{ [if female]} \times \phi \text{ [if black]}.$$

New approaches for GFR estimation that do not require specification of race New race-free approaches were required for creatinine and creatinine-cystatin C equations, but not for the cystatin C equation since the current version of this equation already excludes race. **Table S2** shows the models for these alternative approaches.

1. The first new approach used the same coefficients for the intercept, age, sex and creatinine as in the current equations, but removed the Black race coefficient in computing eGFR; thus the eGFR value for non-Black was assigned to Black individuals.
2. The second new approach was to develop new equations using the same form as the current equations, but without the inclusion of race as an explanatory variable.

Since all equations were developed by the CKD-EPI research group, we refer to them only by filtration marker(s) (eGFR<sub>cr</sub>, eGFR<sub>cys</sub> or eGFR<sub>cr-cys</sub>) and demographic factors in their development (age, sex, and race [ASR], age and sex [AS]). We use the term non-Black (NB) to refer to ASR equations in which the Black race coefficient is removed for computing eGFR.

### ***Assessment of accuracy***

Development dataset: We assessed bias (or systematic error) in race groups as the mean of the difference between  $\log \text{mGFR}$  and  $\log \text{eGFR}$  model fit using root mean square error on the logarithmic scale.<sup>1,2</sup> Bias is the systematic error, or average deviation, between the eGFR and the mGFR and can occur in either direction. The presence of a bias in one group in the development dataset implies that the equation was not fit well to that group. We also show bias on the natural scale as the median of the difference between mGFR and eGFR. This can be expressed in units of GFR (ml/min per 1.73 m<sup>2</sup>), the same units as are used in practice, thus helping with clinical interpretability. As in past publications, we use mGFR-eGFR to reflect the role of mGFR as the dependent variable in the regression models, in which residuals correspond to mGFR-eGFR.

Validation dataset: In the validation dataset, we assessed accuracy as bias on the natural scale, the interquartile range (IQR) of the difference between mGFR and eGFR, as well as agreement between eGFR and mGFR. IQR is a measure of the precision of the eGFR around mGFR. Agreement combines both bias and precision. We show agreement as the percentage of estimates within 30% different from measured GFR (P<sub>30</sub>) and as agreement of eGFR to mGFR categories using guideline recommended CKD GFR (G) stages (< 30, 30-44, 45-59, 60-89 and > 90 ml/min/1.73m<sup>2</sup>)<sup>10,11</sup>. P<sub>30</sub> of 80-90% is considered acceptable for GFR evaluation for many clinical settings and P<sub>30</sub> of  $\geq 90\%$  would be optimal; these values correspond to approximately 65% and > 70%

agreement of eGFR to mGFR categories, respectively.<sup>10</sup>  $1-P_{30}$  corresponds to large errors that may be clinically significant and both  $P_{30}$  and  $1-P_{30}$  have been widely used to define accuracy of current equations.<sup>10</sup>

Confidence intervals were calculated by bootstrap methods using 2000 replicating samples. In addition, we focused on differential bias between racial groups because it could lead to systematic differences in treatment for the same mGFR level.

We assessed performance in subgroups: eGFR (as defined above), age (<40, 40-≤65 and > 65 years), sex, body mass index (BMI) (≤25, 25-≤30, and ≥30 kg/m<sup>2</sup>).

### ***Sensitivity analyses***

- 1. Weighted proportions of Black individuals in the development dataset** To evaluate the impact of proportion of Black individuals included in the development data on the observed performance of GFR estimates, we conducted a weighted data analysis. In the weighted data analyses, we varied the weights assigned to Black individuals from 0% to 100%. This was accomplished by calculating weights for Black individuals equal to the ratio of the target population proportion of Black individuals to the proportion of Black individuals in the current dataset and the converse for the non-Black individuals. For example, for a target population proportion of 13%, if the development proportion Black individuals was 32%, we used a weight of  $13\%/32\%=0.41$  for Black individuals and  $87\%/68\%=1.28$  for non-Black individuals. These weights were used in the regression model to derive weighted regression coefficients and standard errors. For data presentation, we focused on weights that leads to a proportion of Black of 0% and 100%, as the two extremes to see the greatest impact, and on weights that leads to a proportion of Black of 13%, which is the population of self-identified adult Black persons in the United States, and weights that leads to a proportion of Black of 50% for consideration of equality. In evaluating performance in validation population, we also weighted that population similarly.
- 2. Calibration of GFR methods** In the validation dataset, we calibrated GFR measurement methods to urinary clearance of iothalamate, the method used in the development datasets<sup>1,2</sup> based on a systematic comparison of all methods (**Table S1**)<sup>12-14</sup>. In the validation dataset, two methods are used: plasma clearance of iohexol (9 studies) and urinary clearance of EDTA (2 studies). Calibration is required for the former method but not for the latter method. As in a past publication, we increased plasma clearance of iohexol by 5% to calibrate for differences to urinary clearance of iothalamate.<sup>3,15</sup>
- 3. Comparisons to equations for adults developed by other research groups.** Several other research groups have developed equations to estimate GFR from creatinine, cystatin C or the combination. None include a race term, but none included Black individuals in their model development.<sup>16-20</sup> In the validation dataset, we compared the CKD-EPI equations to those from these research groups. This is a fair comparison as the CKD-EPI equations were not developed in this validation dataset.

## B. Estimation of prevalence of chronic kidney disease in the United States

The National Health and Nutrition Examination Survey (NHANES) is a cross-sectional, multistage, stratified, clustered probability samples of the civilian, non-institutionalized population of the U.S. The study population for this analysis was limited to 4563 participants who were 20 years and older from 1999-2000 and 2001-2002 surveys who had completed the examination in the mobile examination center, and were not missing serum creatinine or cystatin C measurements (**Table S4**).<sup>21,22</sup> Methods are similar to previous reports.<sup>23-26</sup> Measured GFR was not available in NHANES.

As previously reported, serum creatinine was measured using a kinetic rate Jaffe method and re-calibrated to standardized creatinine measurements obtained in at the Cleveland Clinic Research Laboratory (Cleveland, OH).<sup>27</sup> Cystatin C was measured using a particle-enhanced immunonephelometric assay (N Latex Cystatin C; Dade Behring, Deerfield, IL) with a coefficient of variation of 5%.<sup>23-26</sup> GFR was estimated using the equations described above. Albuminuria was defined as albumin-to-creatinine ratio (ACR)  $\geq 30$  mg/g in a spot urine sample.<sup>23,28</sup> Repeated measurements, obtained in 1,241 NHANES 1988-1994 participants approximately 2 weeks after the original examination were used to estimate the persistence of albuminuria.<sup>28</sup> CKD was defined as persistent albuminuria or eGFR  $< 60$  ml/min/1.73 m<sup>2.29</sup>. CKD GFR stages were classified according to eGFR.<sup>10</sup> We also used the same methods to analyze NHANES 1999-2018 participants with creatinine data (N=49,015) to confirm that limiting the analysis to individuals with cystatin C data did not change the inferences (data not shown).

Analyses were performed incorporating the sampling weights to obtain unbiased estimates from the complex NHANES sampling design using Stata (Version 15.1, StataCorp, College Station, TX). Standard errors for all estimates were obtained using the Taylor series (linearization) method following NHANES recommended procedures and weights.<sup>30-32</sup> Confidence intervals for prevalence estimates for CKD stages incorporating persistence data on of albuminuria were made using bootstrap methods implemented in Stata. Prevalence estimates were applied to the 2019 U.S. Census of 246.6 million adults people greater than 20 years of age to obtain estimates of the number of individuals with CKD in the U.S.

## Figures and Tables

**Figure S1:** Flow diagram of the CKD-EPI development and validation datasets

Legend: The flow diagram shows the evaluation of studies and participants included in the development and validation of the 2009, 2012 and 2021 CKD-EPI equations.<sup>1,2</sup> The dark gray shaded boxes show the three main datasets included in the analyses presented in the analysis. The light gray shaded box indicates a dataset used in a secondary analysis. Squares represent addition or removal of studies. Circles represent removal of subset of studies. Dashed lines indicate when studies or participants were removed. Solid lines indicate when studies were added.

The green shaded area shows the creatinine development and validation studies. A more detailed figure showing the development of those studies was previously published.<sup>1</sup> The yellow shaded area depicts the transition from the studies included in the creatinine datasets to those included in the development and validation of the 2012 cystatin C and creatinine-cystatin C equations. The blue shaded area depicts the studies included in the new 2021 external validation dataset.

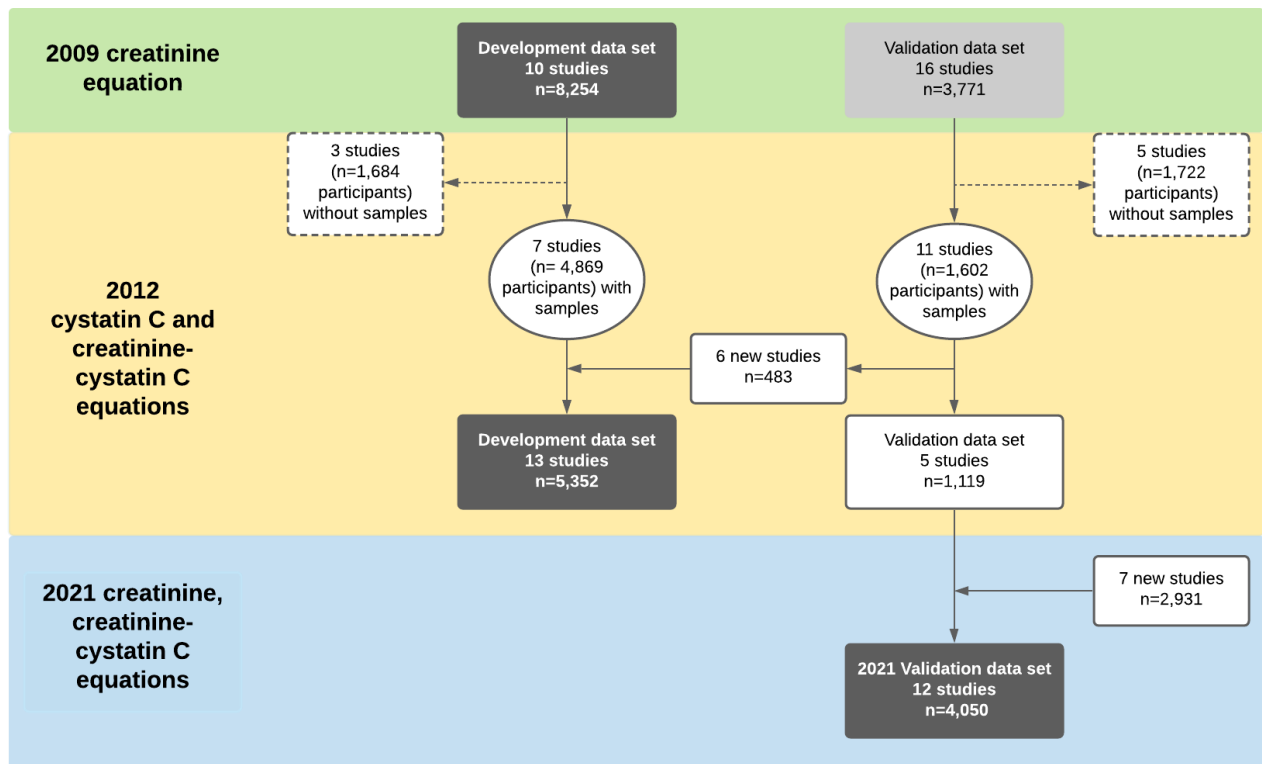

**Figure S2:** Distribution of measured GFR and age by sex and race groups for the development and validation datasets

a. Distribution of measured GFR

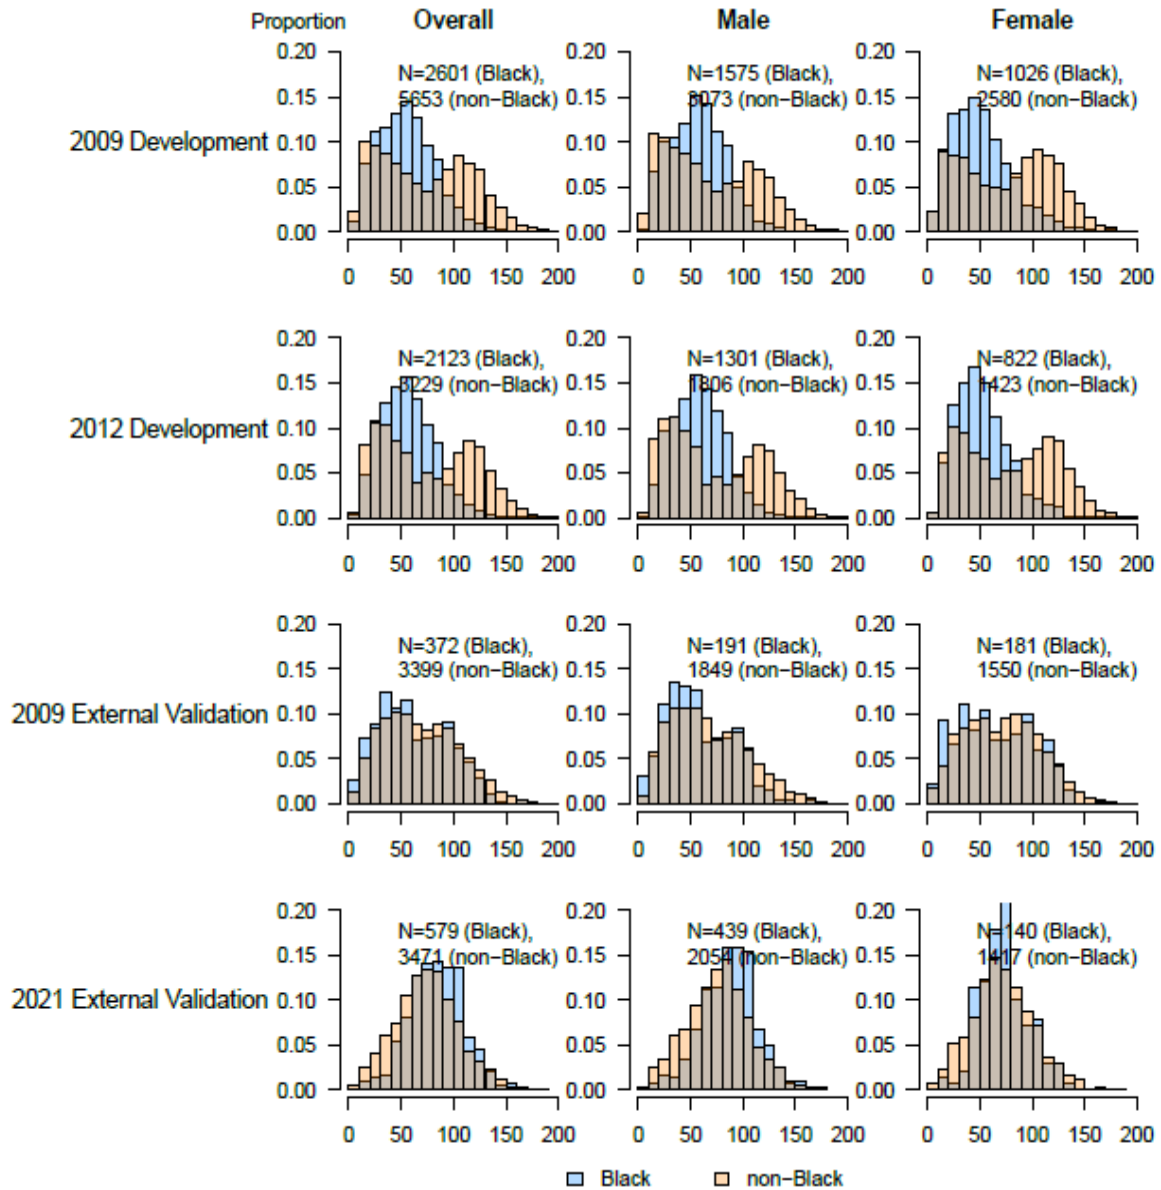

b. Distribution of age

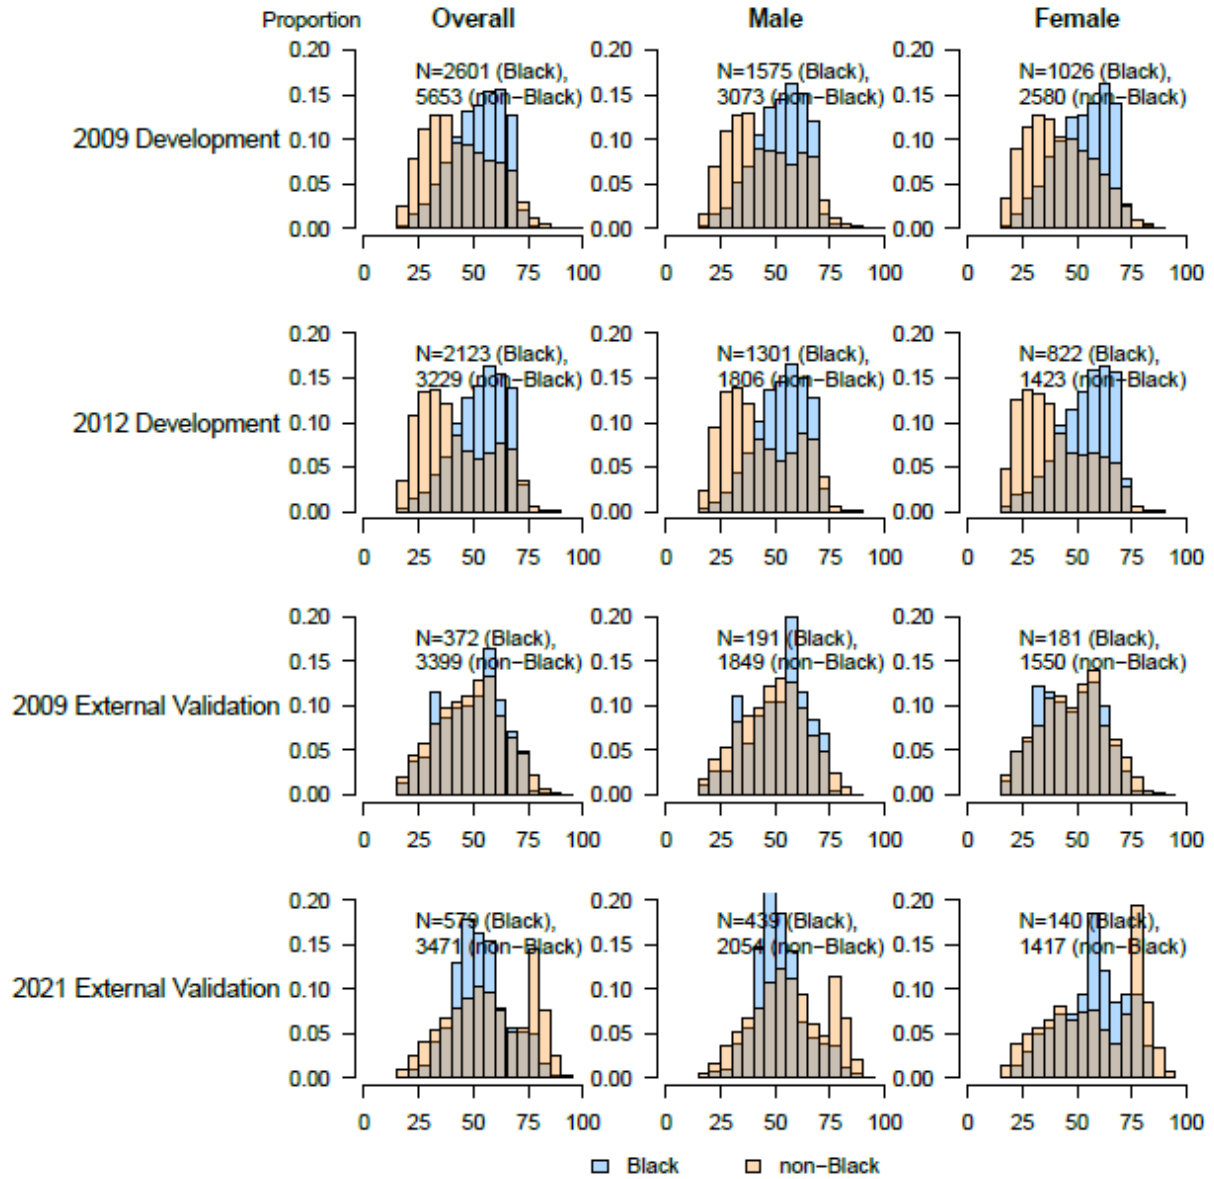

**Figure S3:** Estimated GFR using current and new equations for simulated patients

ASR, refers to the current CKD-EPI equation which included age, sex and race as demographic factors. NB, refers to the new equation presented in this manuscript where the term for Black race is removed in the computation of the eGFR value. AS refers to the new equation refit using only creatinine, age and sex. Cr, creatinine, Cys, cystatin C; y, age

a. Creatinine

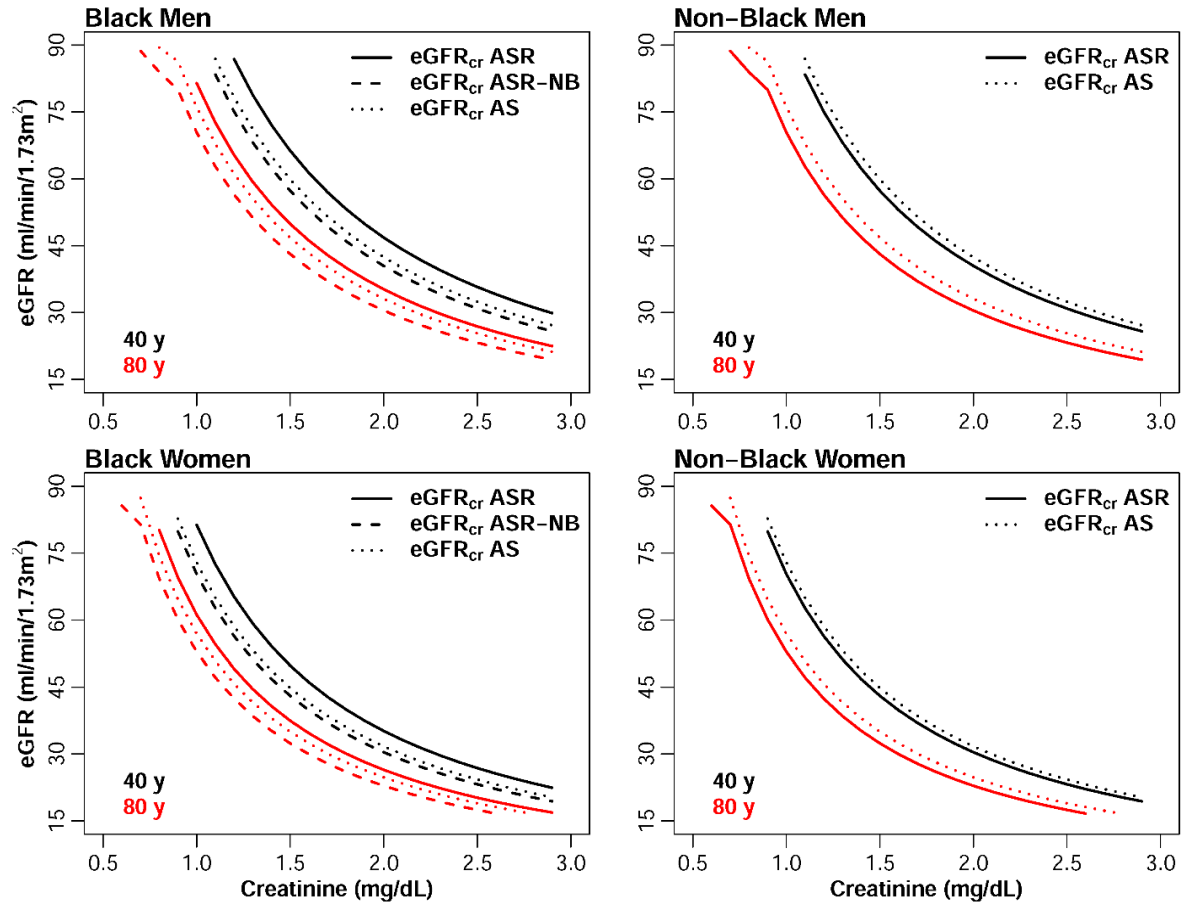



b. Creatinine-Cystatin C

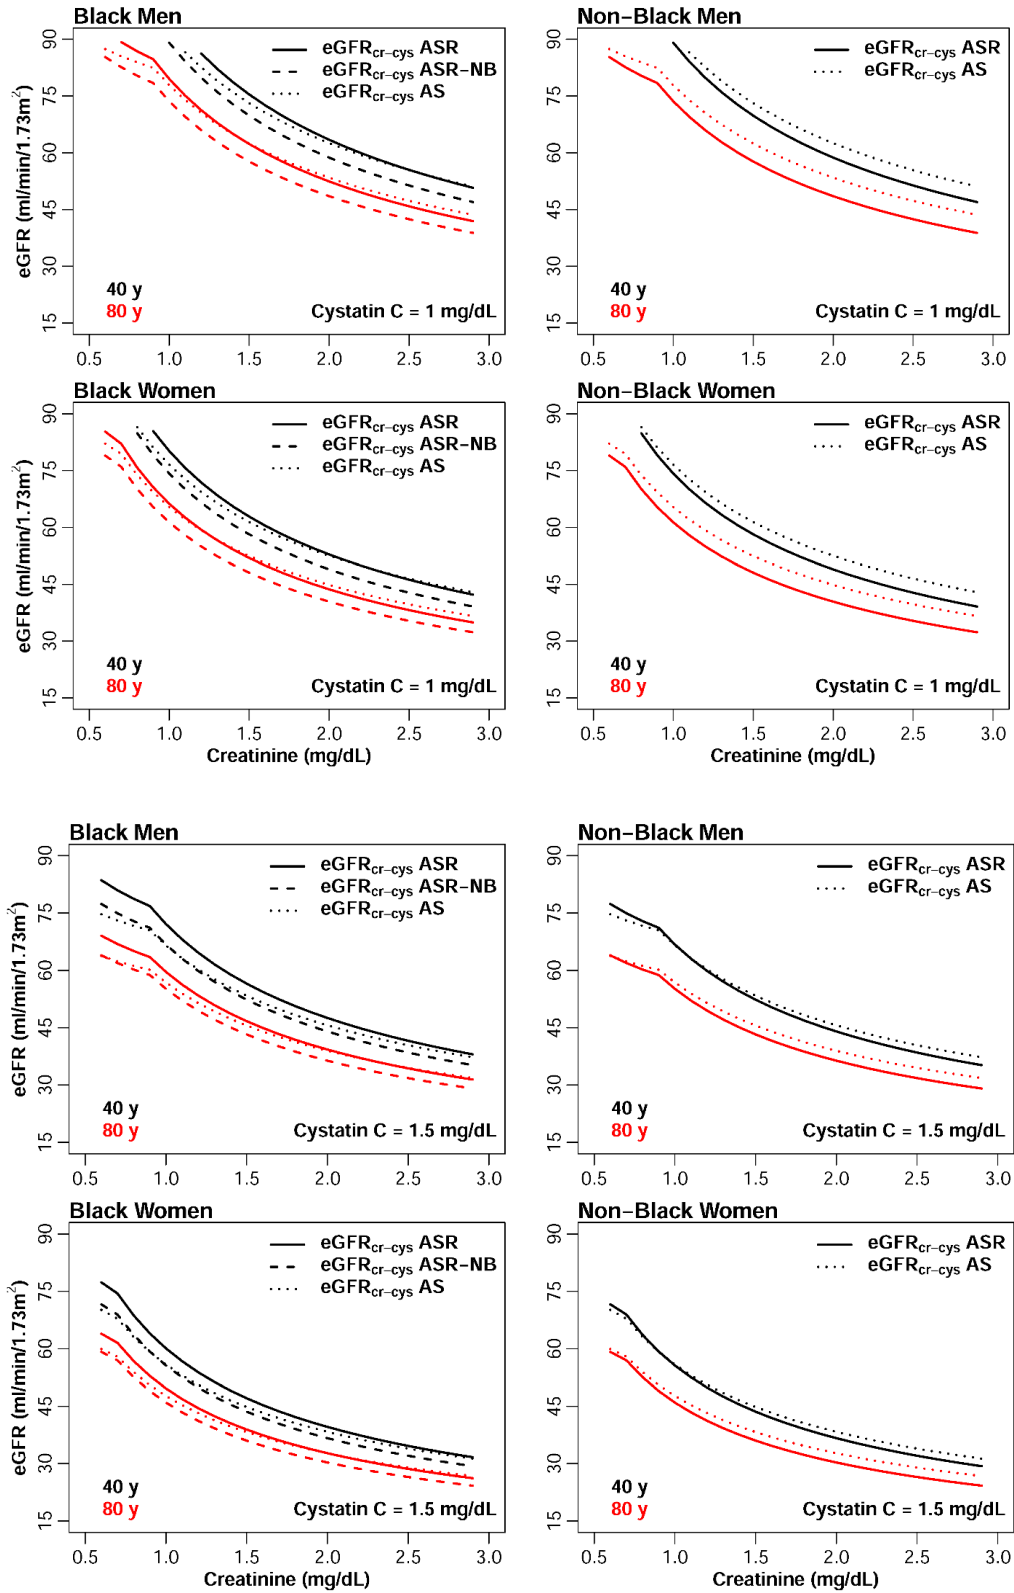

**Figure S4:** Comparison of measured vs estimated GFR by race groups across alternative GFR estimating equations in development dataset

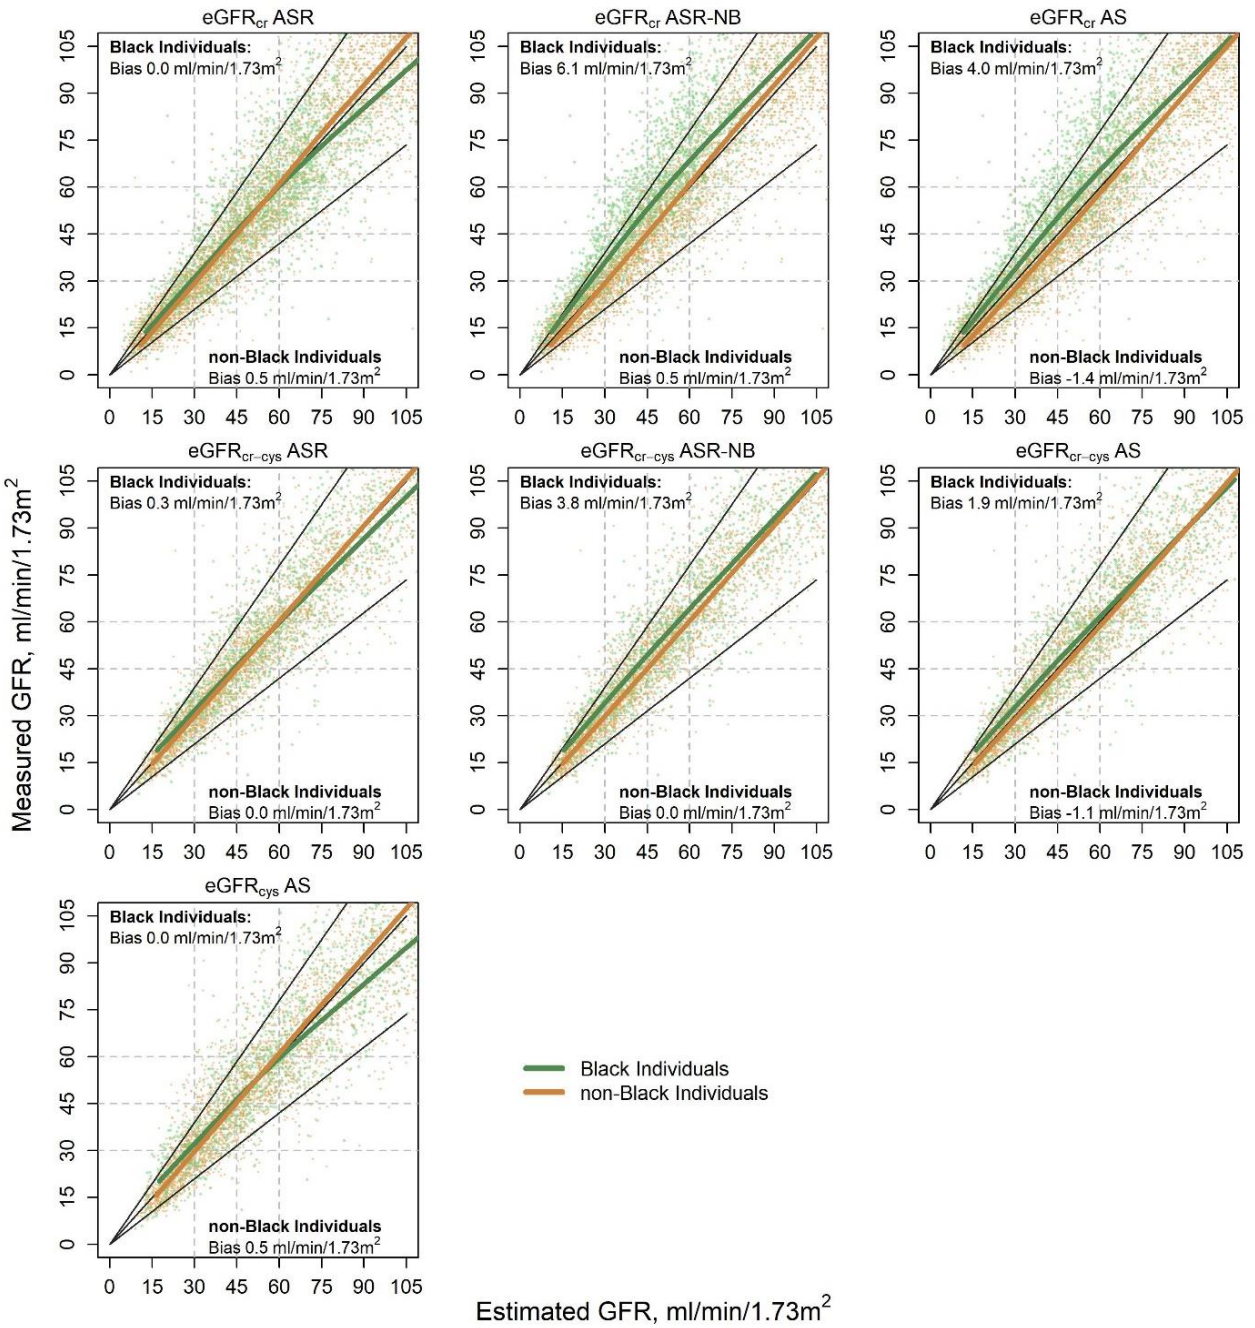

**Figure S5:** Performance for weighted blended AS equations in 2009 and 2012 development datasets

Top panel: Bias as measured as the difference between measured and estimated GFR and units are in ml/min per 1.73 m<sup>2</sup>. Bottom panel: Accuracy as measured by 1- P<sub>30</sub> or the percentage of estimates greater than 30% of measured GFR. The vertical bars indicate 95% confidence intervals. The dotted black line represents the difference in the GFR equation performance between race groups. Cr, creatinine. Cys, cystatin C.

The numbers in the x axis refer to the proportion of Black individuals in the development dataset. The 2009 development and 2012 development include 31% and 40% respectively (indicated as \*). These correspond to the new AS equation. To demonstrate the impact of proportion of Black individuals included in the development dataset, we weighted the population for values of 0, 13 (representing the proportion of Blacks in the current US population), 50 and 100% Blacks.

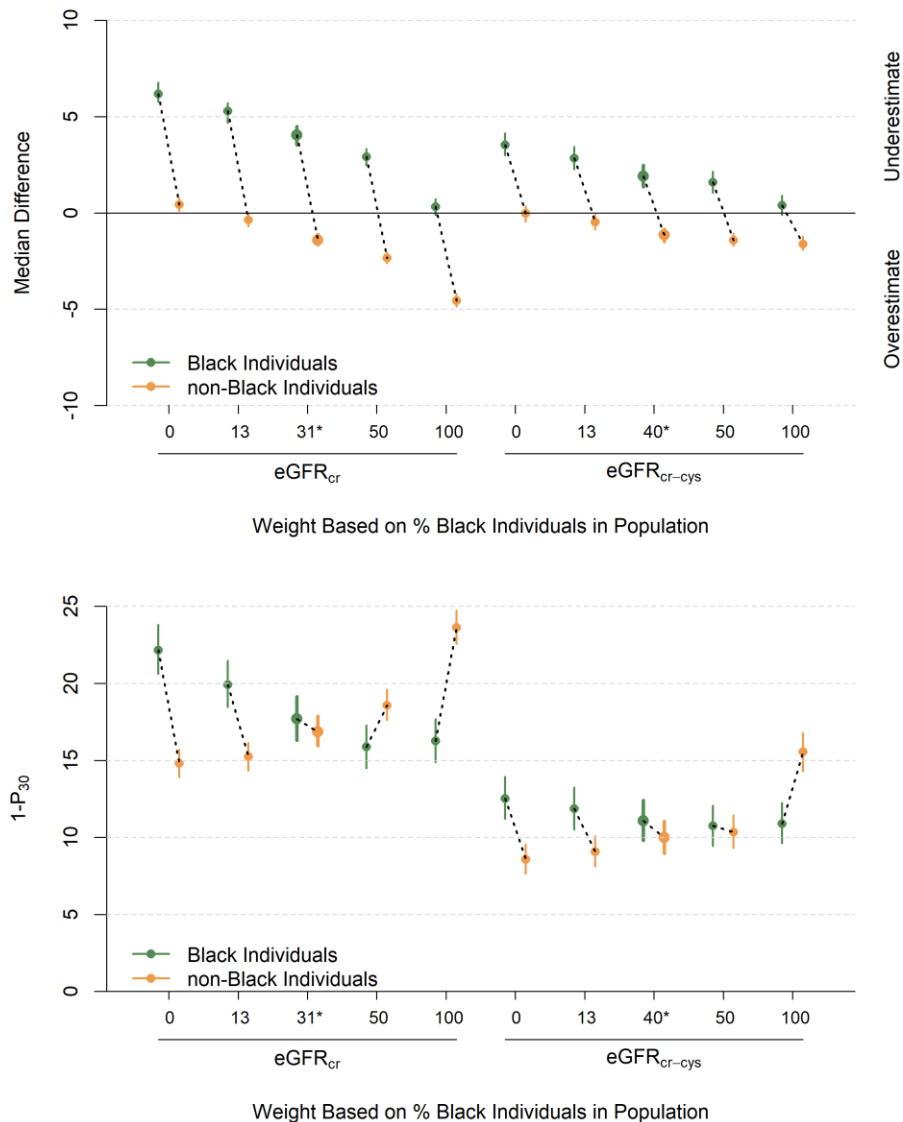

**Figure S6:** Performance of Current and New Equations compared to directly measured GFR in the 2021 Validation Dataset, Overall and by Race Groups

Top panel: Bias as measured as the difference between measured and estimate GFR and units are in ml/min per 1.73 m<sup>2</sup>. Bottom panel: Accuracy as measured by 1- P<sub>30</sub> or the percentage of estimates greater than 30% of measured GFR. The equations are referred to by filtration marker(s) (eGFR<sub>cr</sub>, eGFR<sub>cys</sub> or eGFR<sub>cr-cys</sub>) and the demographic factors included in equation development (age, sex, and race [ASR] or age and sex [AS]). The current equations are the eGFR<sub>cr</sub> (ASR), eGFR<sub>cys</sub> (AS) and eGFR<sub>cr-cys</sub> (ASR). Non-Black (NB) refers to equations in which Black race is removed in computation. The vertical bars indicate 95% confidence intervals. The dotted black line represents the difference in the GFR equation performance between race groups.

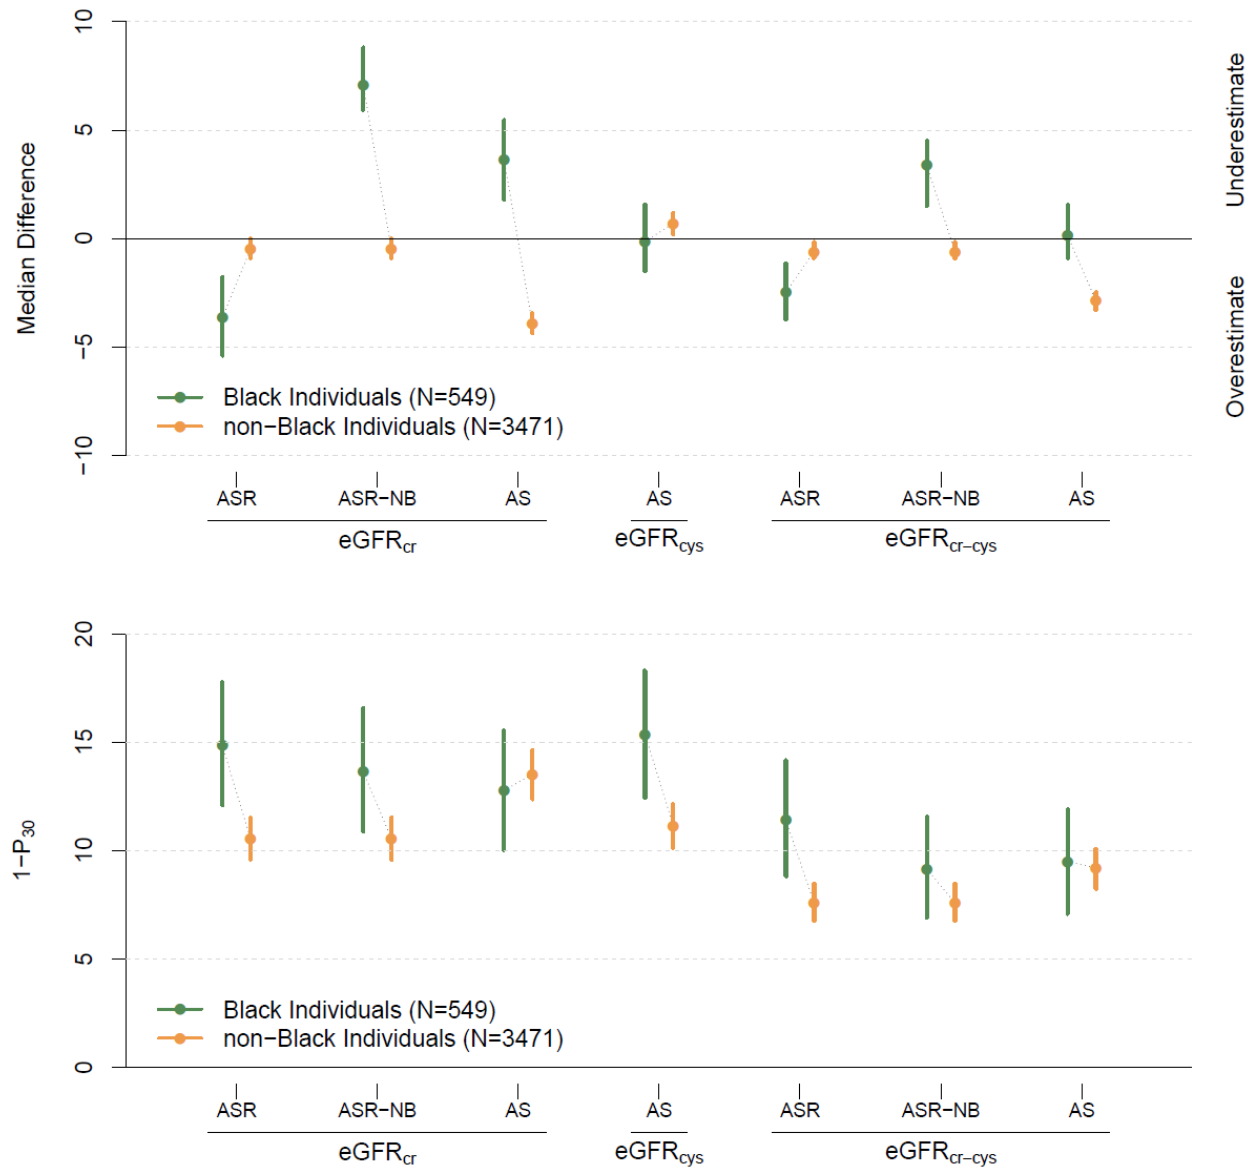

**Figure S7:** Comparison of measured vs estimated GFR by race groups across alternative GFR estimating equations in the 2021 validation dataset, calibrated for possible variation in mGFR measurement methods

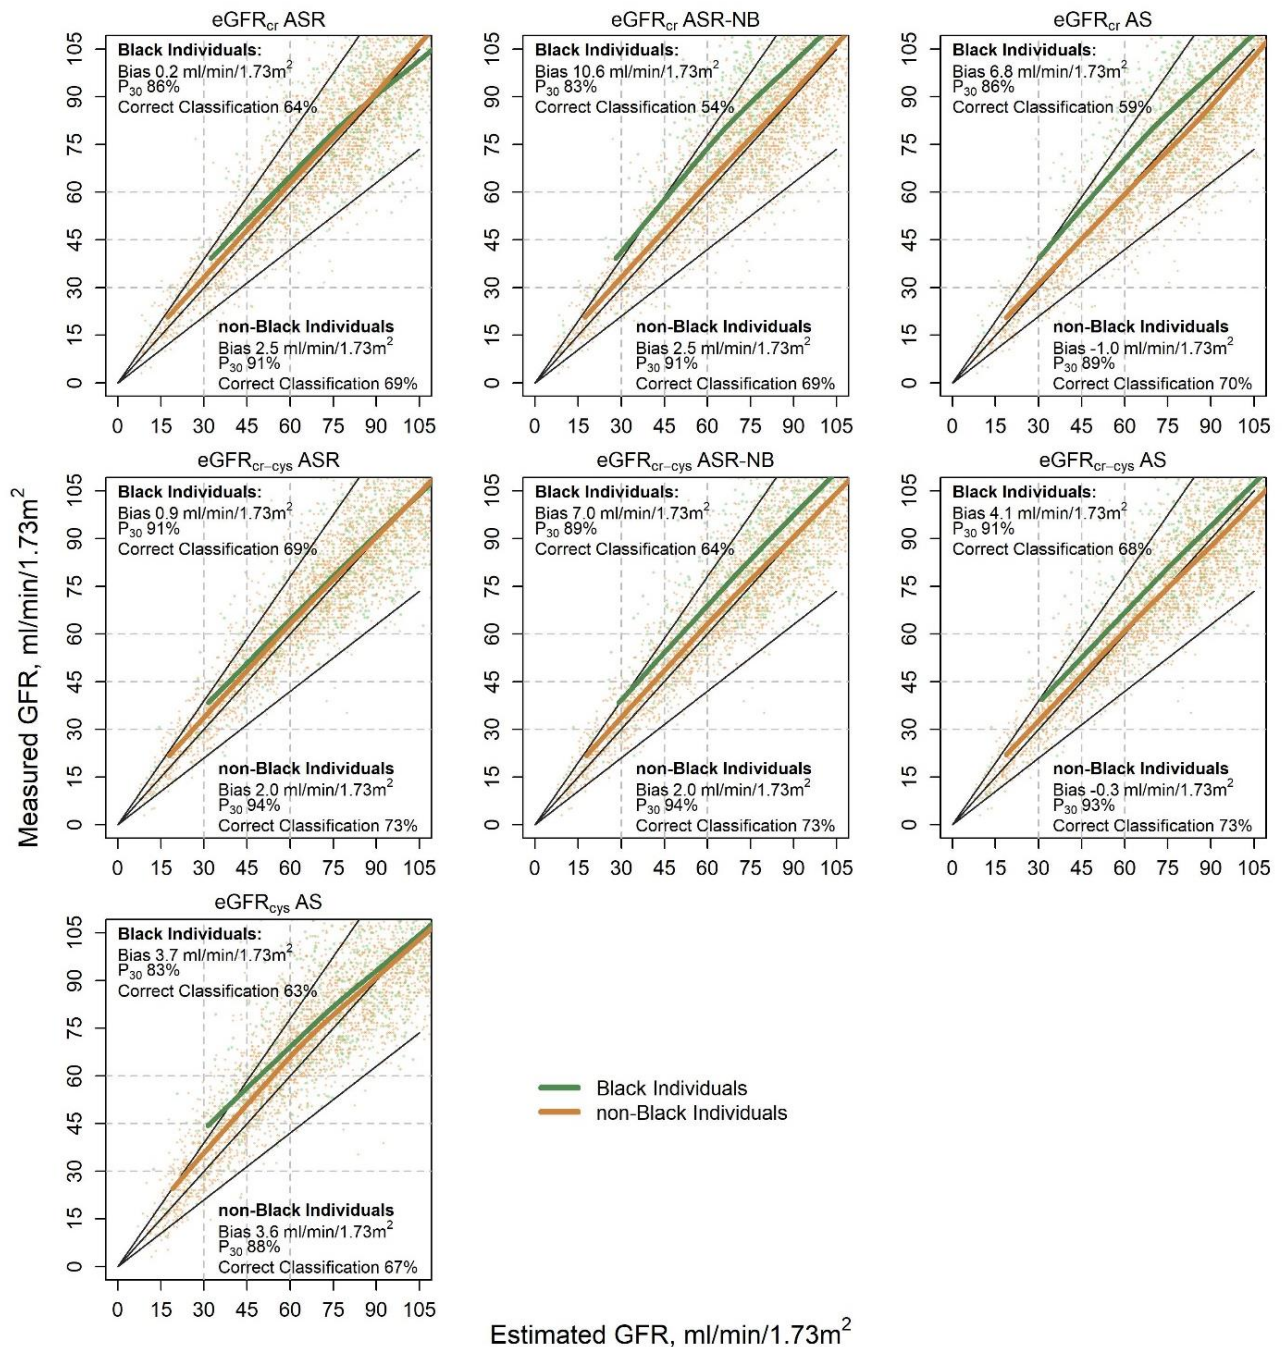

**Figure S8:** Performance of Current and New Equations compared to directly measured GFR in the 2021 Validation Dataset, Overall and by Race Groups, calibrated for possible variation in mGFR measurement methods

Top panel: Bias as measured as the difference between measured and estimate GFR and units are in ml/min per 1.73 m<sup>2</sup>. Bottom panel: Accuracy as measured by 1- P<sub>30</sub> or the percentage of estimates greater than 30% of measured GFR. The equations are referred to by filtration marker(s) (eGFR<sub>cr</sub>, eGFR<sub>cys</sub> or eGFR<sub>cr-cys</sub>) and the demographic factors included in equation development (age, sex, and race [ASR] or age and sex [AS]). The current equations are the eGFR<sub>cr</sub> (ASR), eGFR<sub>cys</sub> (AS) and eGFR<sub>cr-cys</sub> (ASR). Non-Black (NB) refers to equations in which Black race is removed in computation. The vertical bars indicate 95% confidence intervals. The dotted black line represents the difference in the GFR equation performance between race groups.

In this figure, we are using measured GFR values calibrated to urinary clearance of iothalamate, the method used in the development datasets. Please see Supplement Page 10 for details

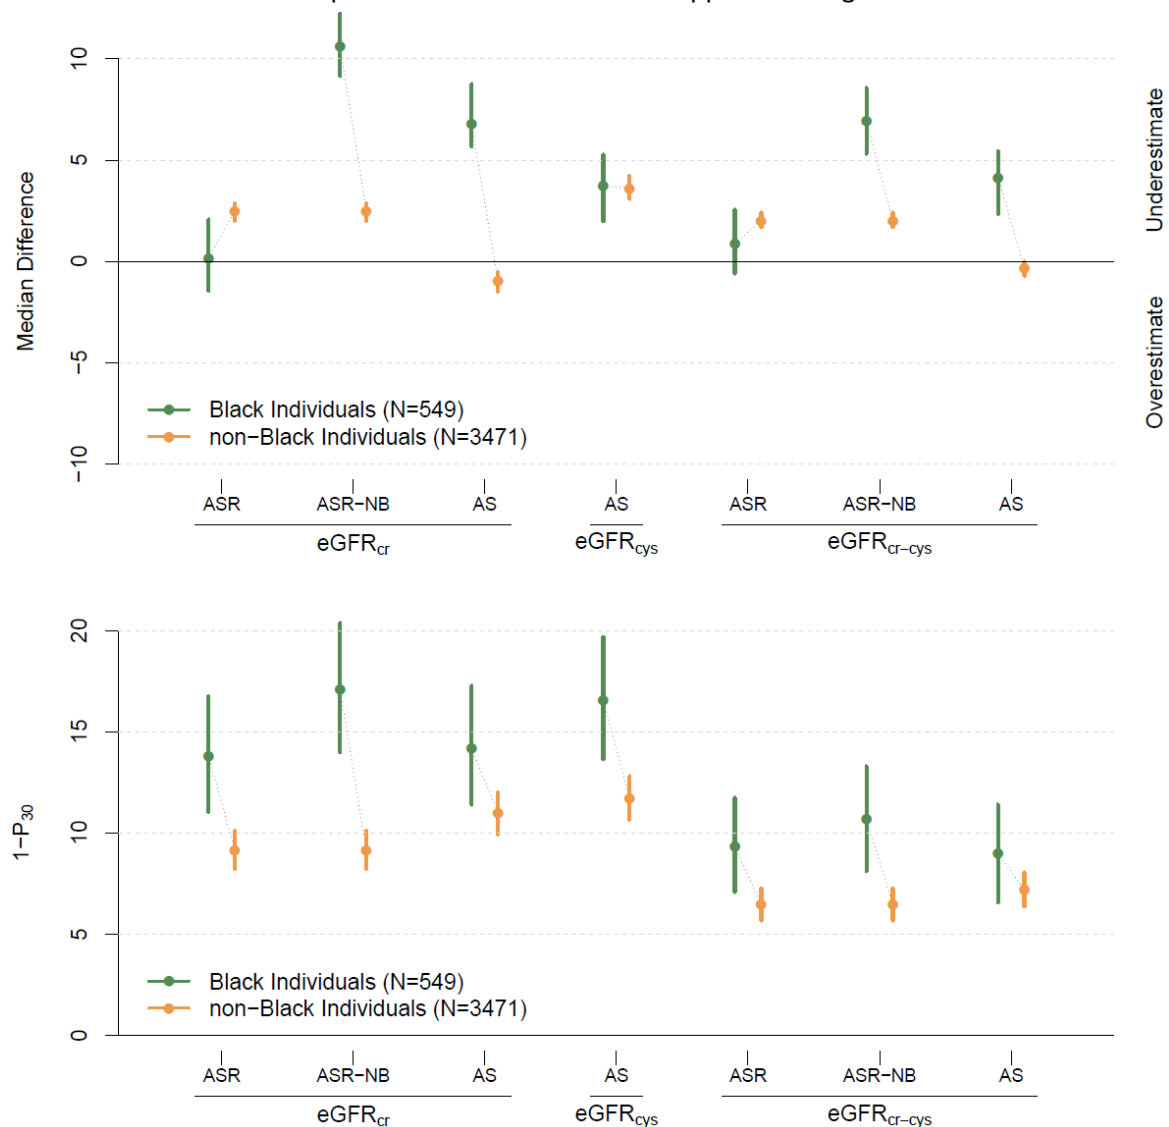

**Figure S9:** Performance for weighted blended AS eGFR equations in 2021 validation dataset

Top panel: Bias as measured as the difference between measured and estimated GFR and units are in ml/min per 1.73 m<sup>2</sup>. Bottom panel: Accuracy as measured by 1- P<sub>30</sub> or the percentage of estimates greater than 30% of measured GFR. The vertical bars indicate 95% confidence intervals. The dotted black line represents the difference in the GFR equation performance between race groups. Cr, creatinine. Cys, cystatin C

The numbers in the x axis refer to the proportion of Black individuals in the development dataset. The 2009 development and 2012 development include 31% and 40% respectively (indicated as \* on the figures). To demonstrate the impact of proportion of Black individuals included in the development dataset, we weighted the population for values of 0, 13 (representing the proportion of Blacks in the current US population), 50 and 100% Blacks.

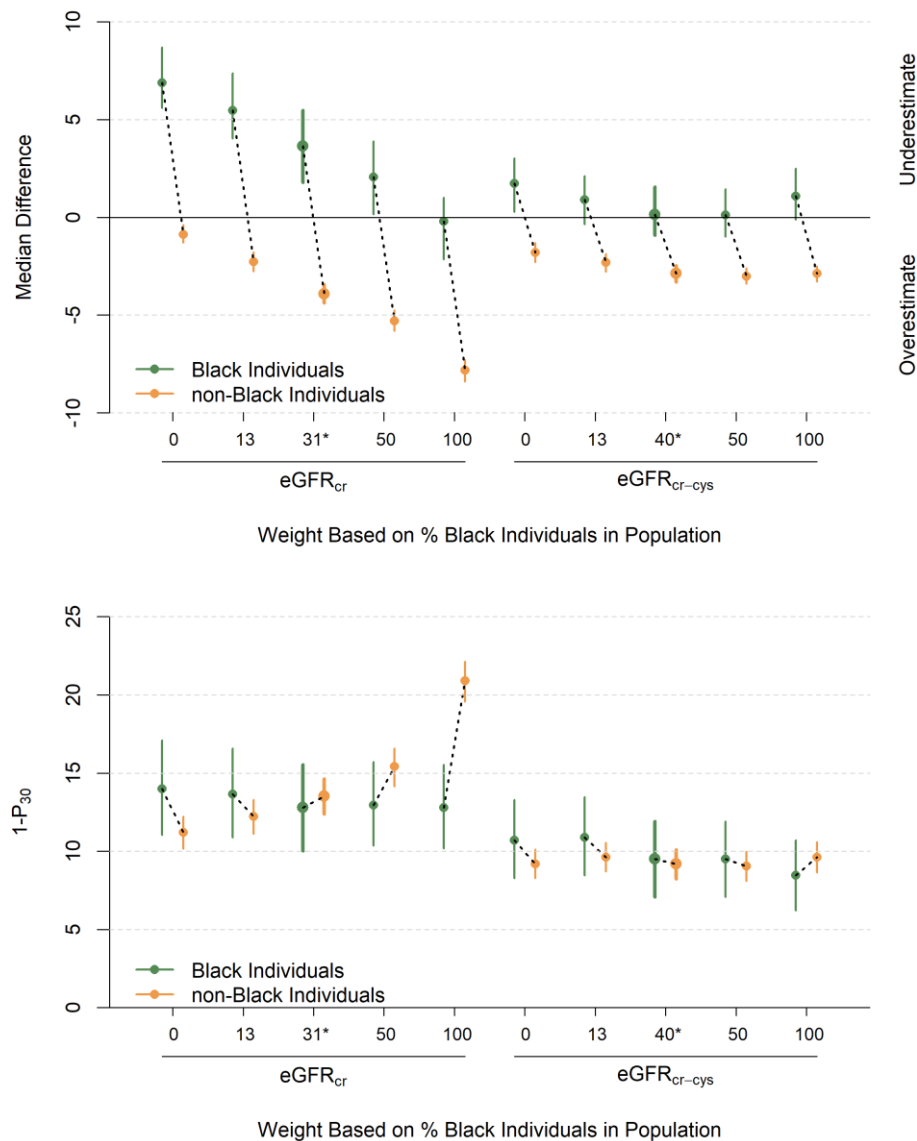

**Figure S10:** Performance for current vs new equations in 2021 and 2009 validation datasets in subgroups as defined by eGFR, age, sex, and BMI

Legend: Top panel: Bias as measured as the difference between measured and estimated GFR and units are in ml/min per 1.73 m<sup>2</sup>. Bottom panel: Accuracy as measured by 1- P<sub>30</sub> or the percentage of estimates greater than 30% of measured GFR. The vertical bars indicate 95% confidence intervals. The dotted black line represents the difference in the GFR equation performance by race.

\*indicates sample size for subgroups with less 100 people and results are unreliable.

eGFR stages (< 30, 30-59, 60-89 and > 90 ml/min/1.73m<sup>2</sup>), age (<40, 40-≤65 and > 65 years), sex, body mass index (BMI) (≤25, 25-≤30, and ≥30 kg/m<sup>2</sup>). eGFR was defined separately for each equation.

ASR, refers to the current CKD-EPI equation which included age, sex and race as demographic factors.

NB, refers to the new equation presented in this manuscript where the term for Black race is removed from the computation of the eGFR value. AS refers to the new equation refit using only creatinine, age and sex. Cr, creatinine, Cys, cystatin C; y, age. Units for GFR are ml/min per 1.73 m<sup>2</sup>.



a. Performance of eGFR creatinine by eGFR subgroups in 2021 external validation

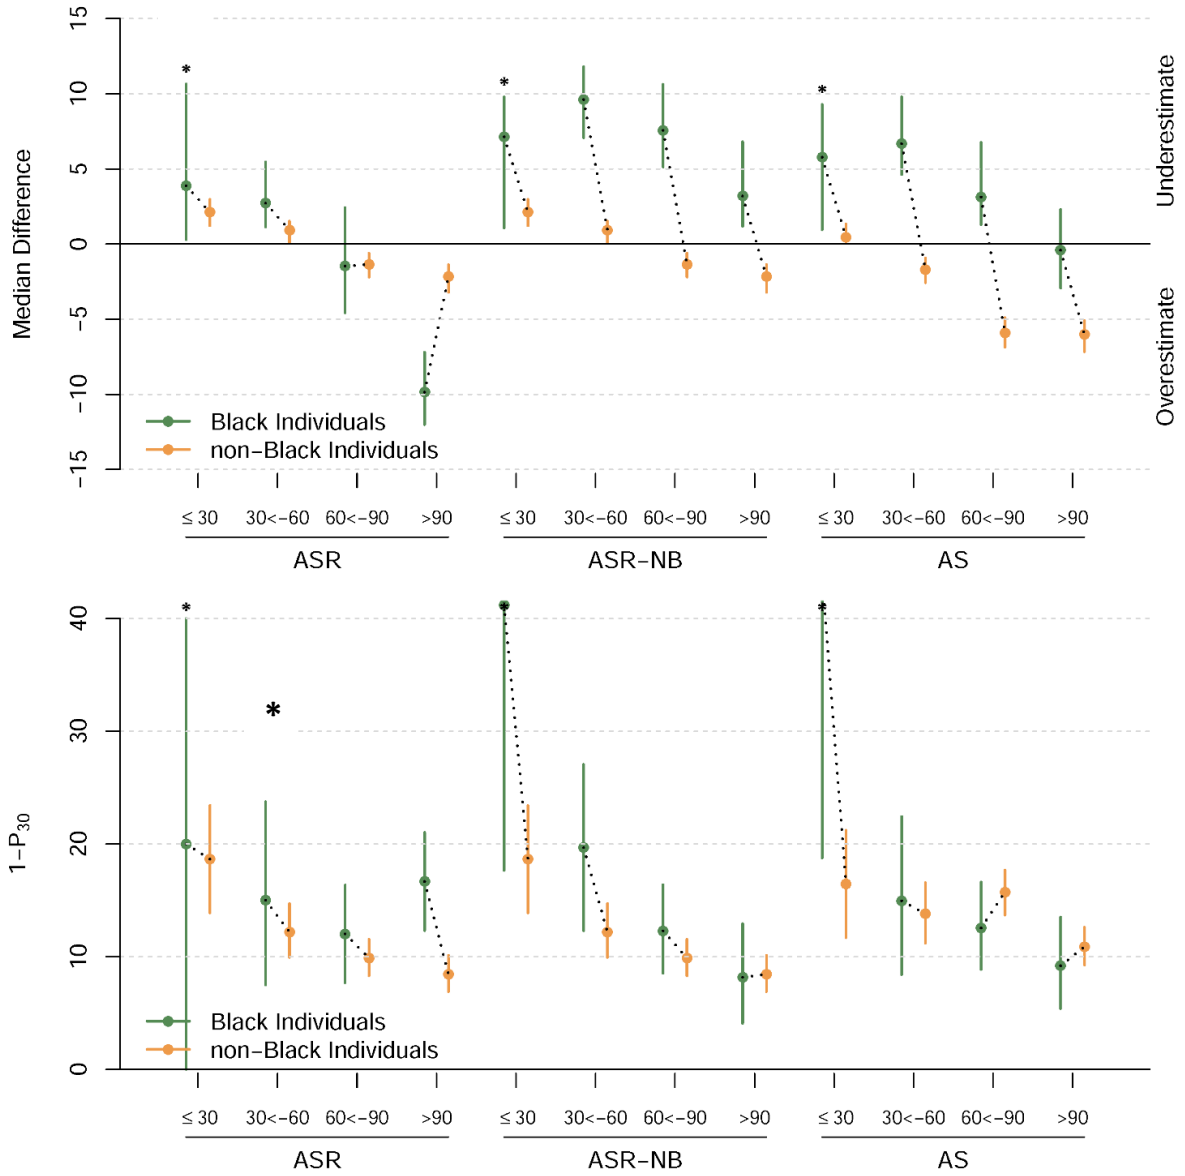

b. Performance of eGFR creatinine-cystatin C by eGFR subgroups in 2021 external validation

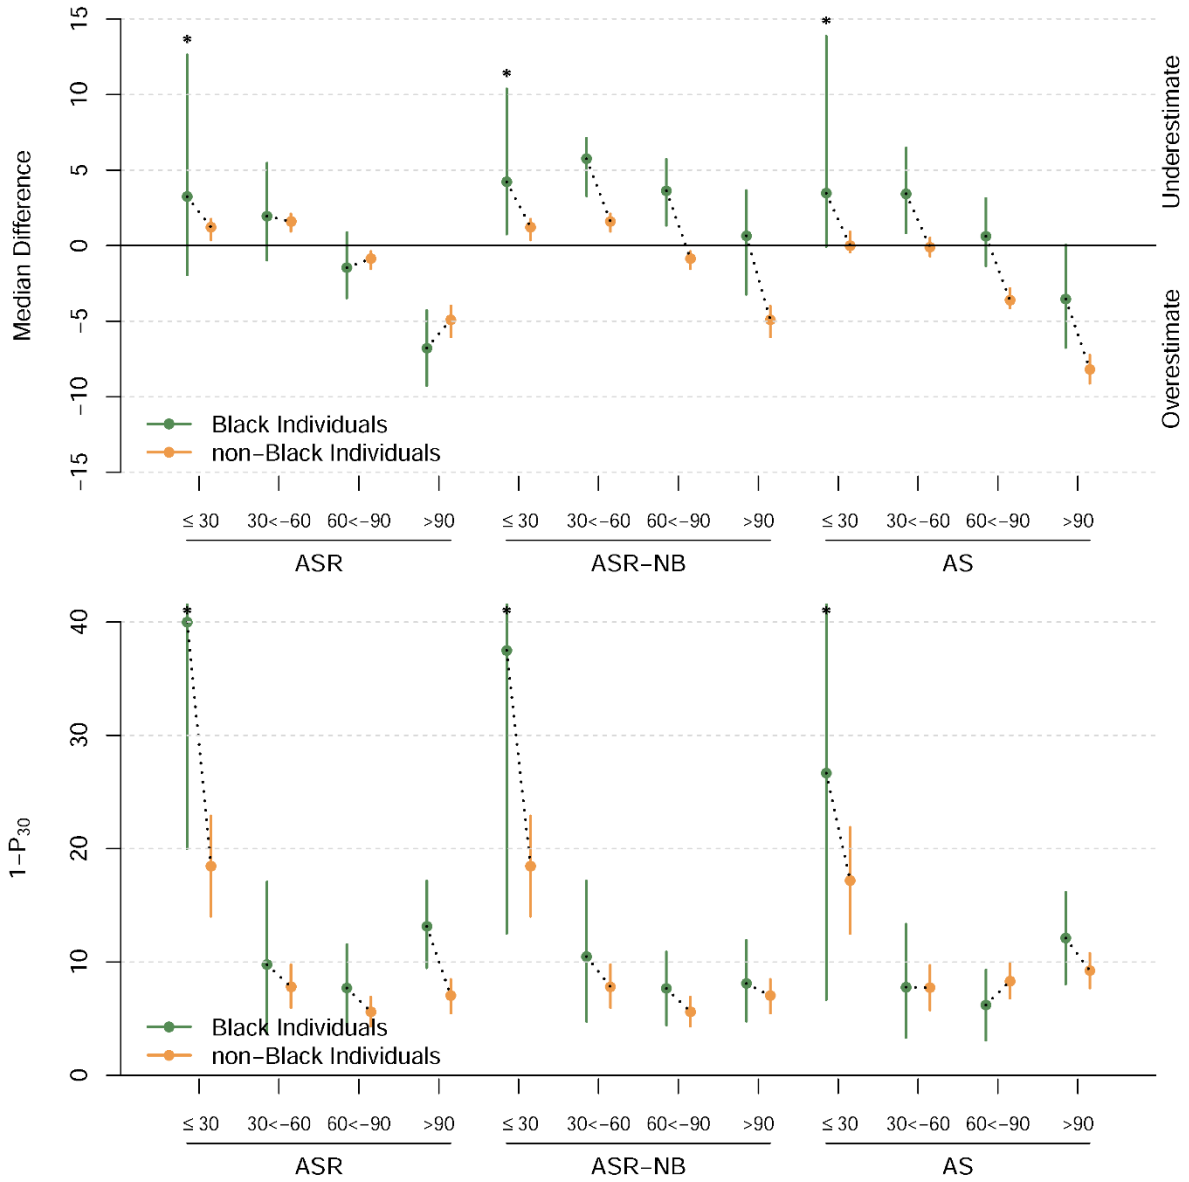

c. Performance of eGFR creatinine by eGFR subgroups in 2009 external validation

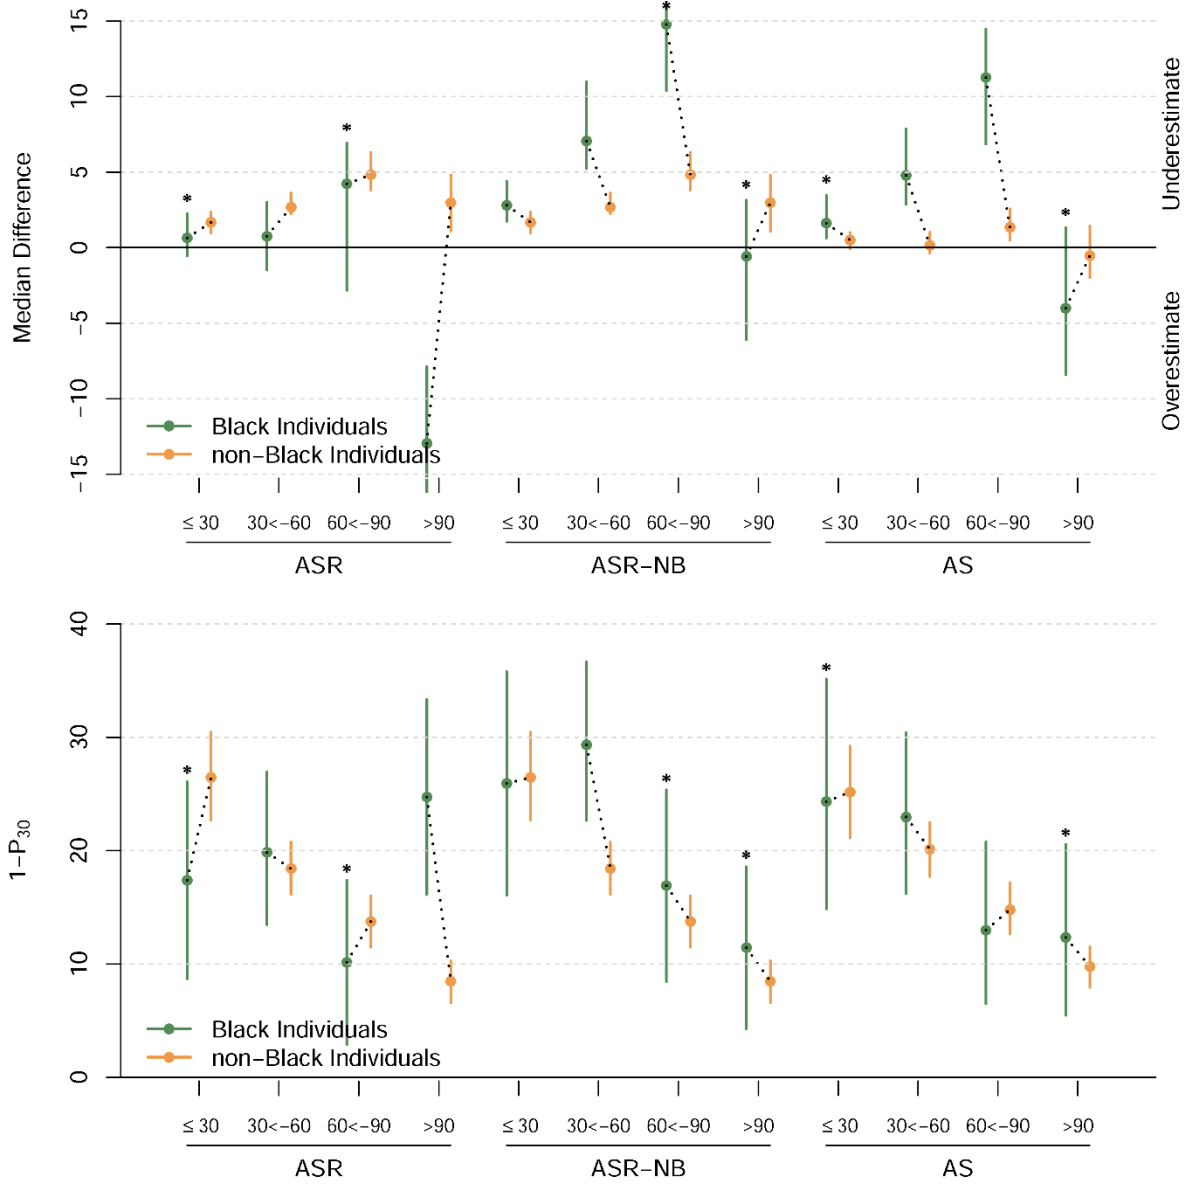

d. Performance of eGFR creatinine by age subgroups in 2021 external validation

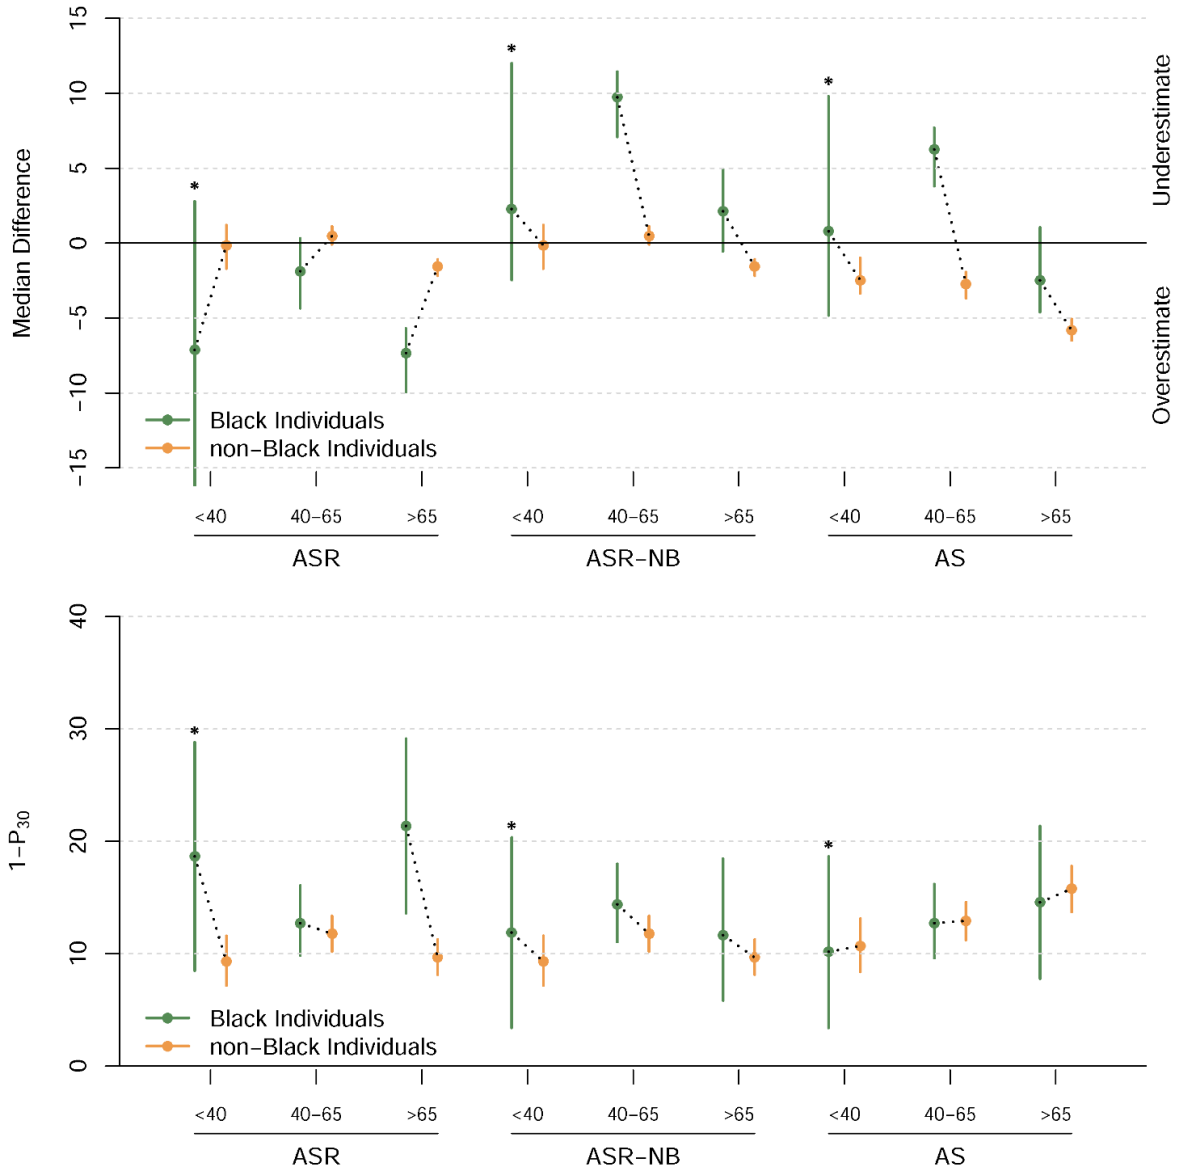

e. Performance of eGFR creatinine-cystatin C by age subgroups in 2021 external validation

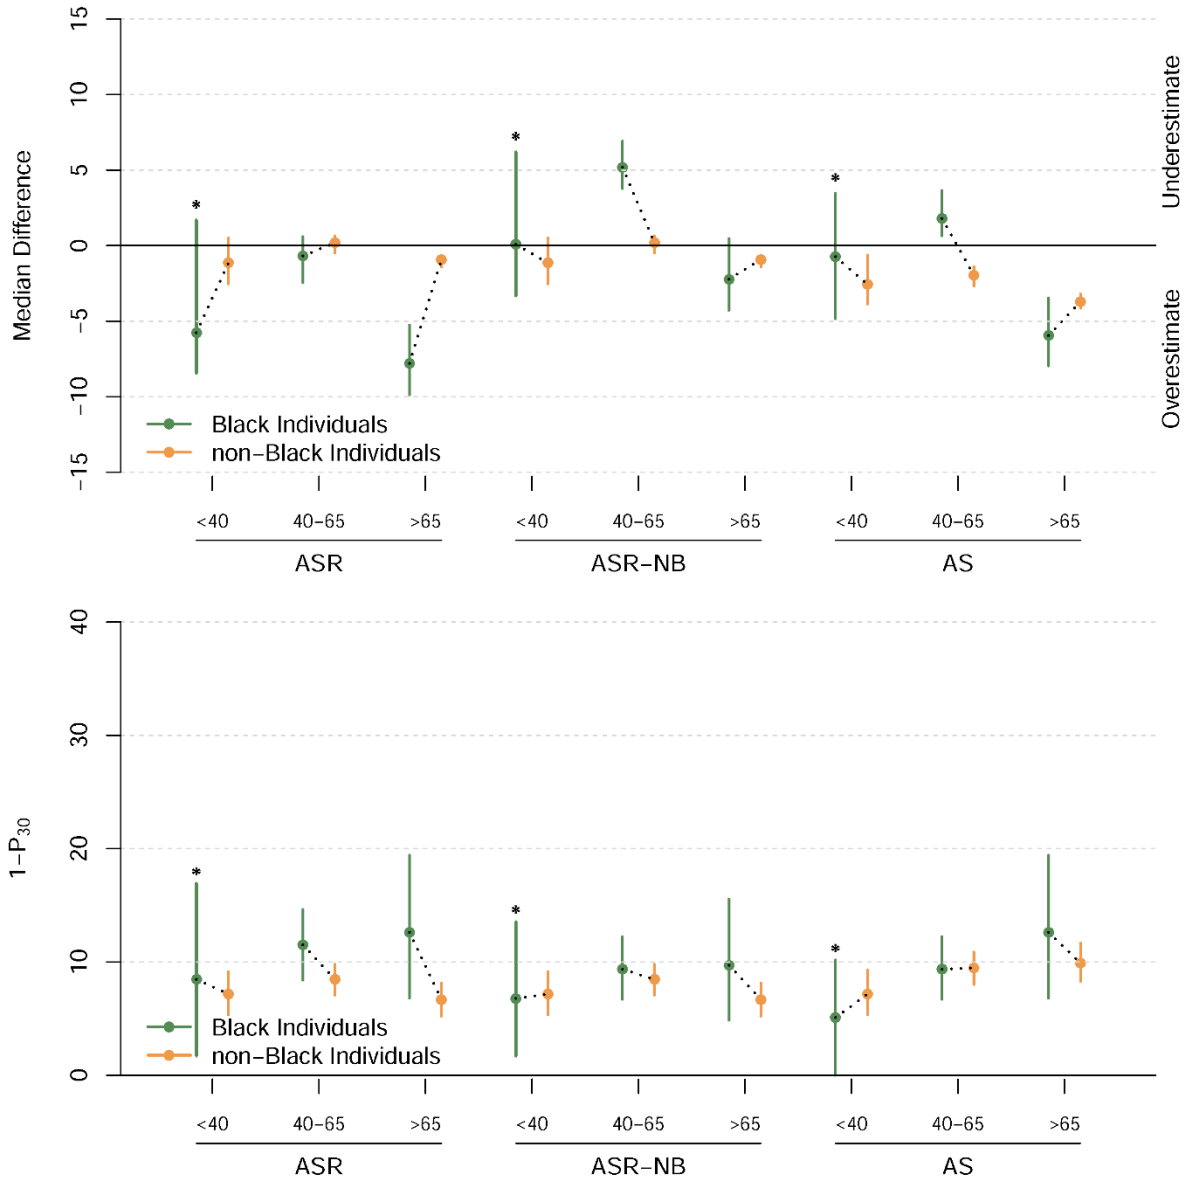

f. Performance of eGFR creatinine by age subgroups in 2009 external validation

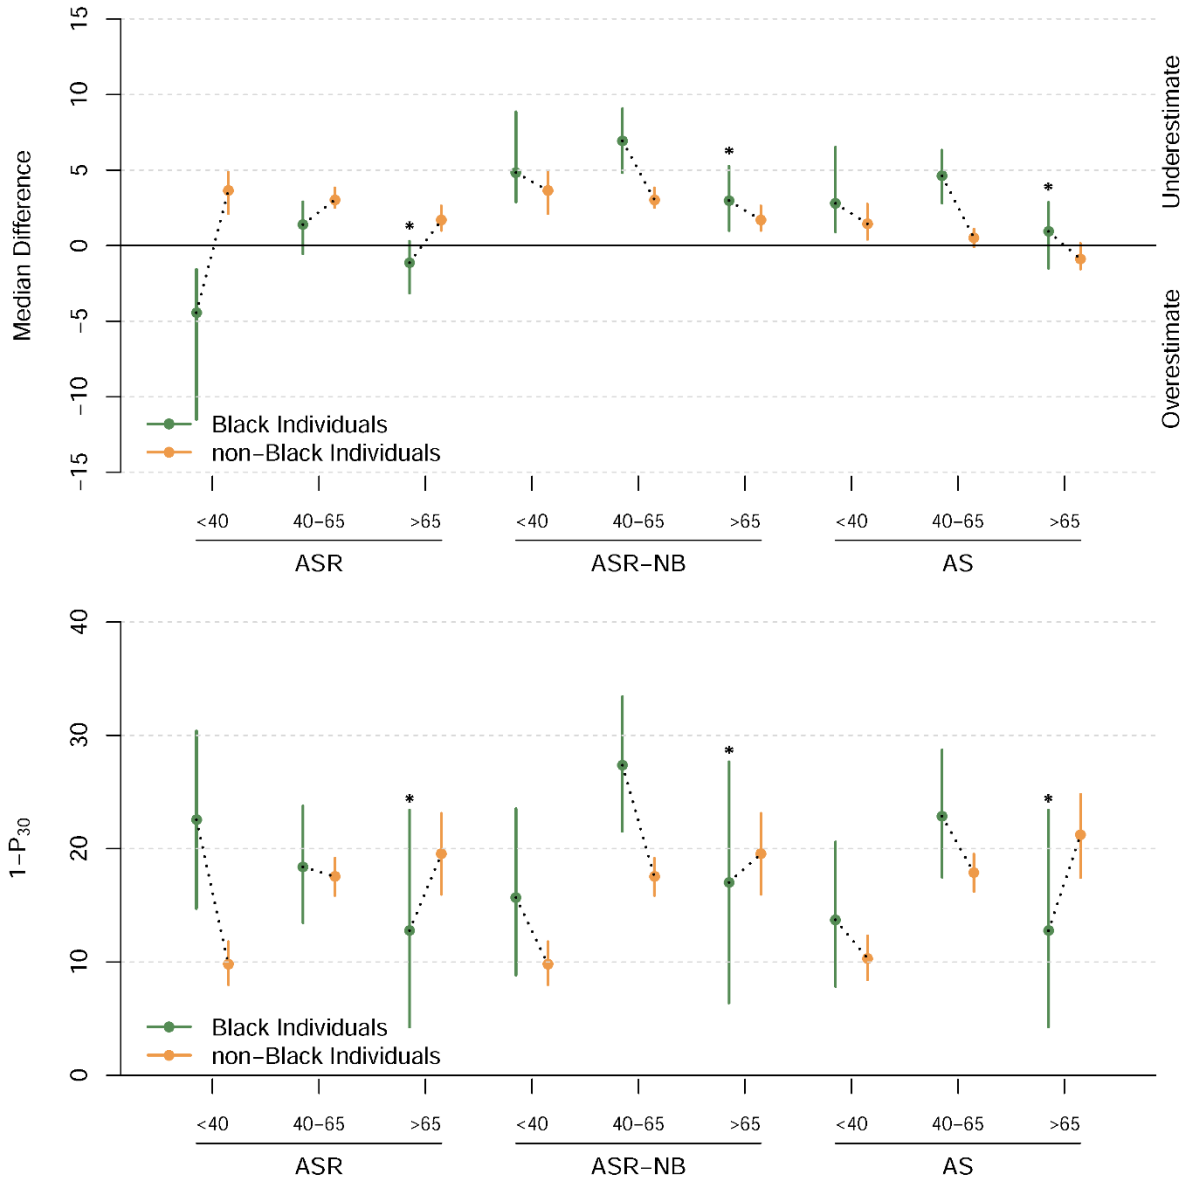

g. Performance of eGFR creatinine by BMI subgroups in 2021 external validation

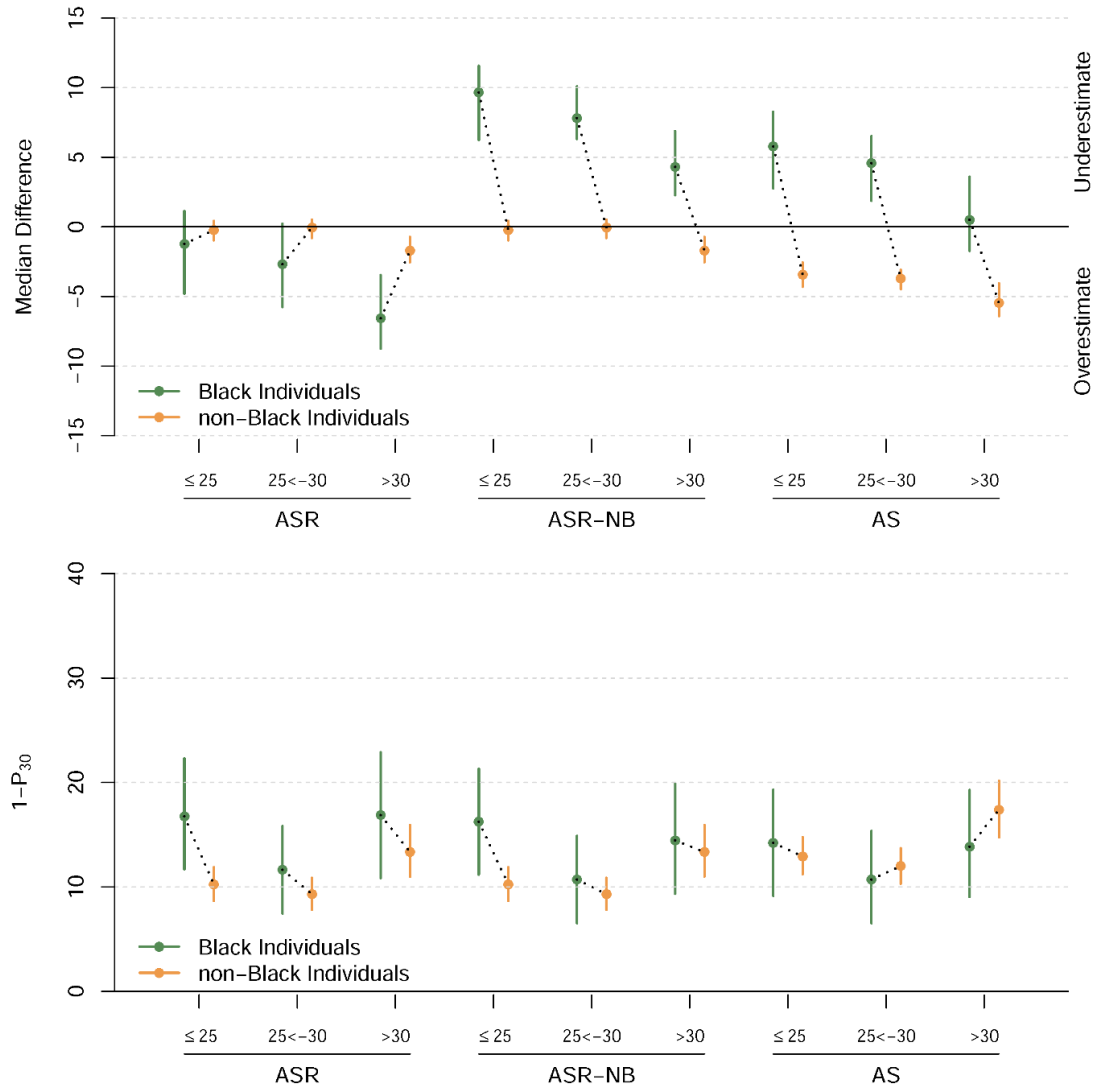

h. Performance of eGFR creatinine-cystatin C by BMI subgroups in 2021 external validation

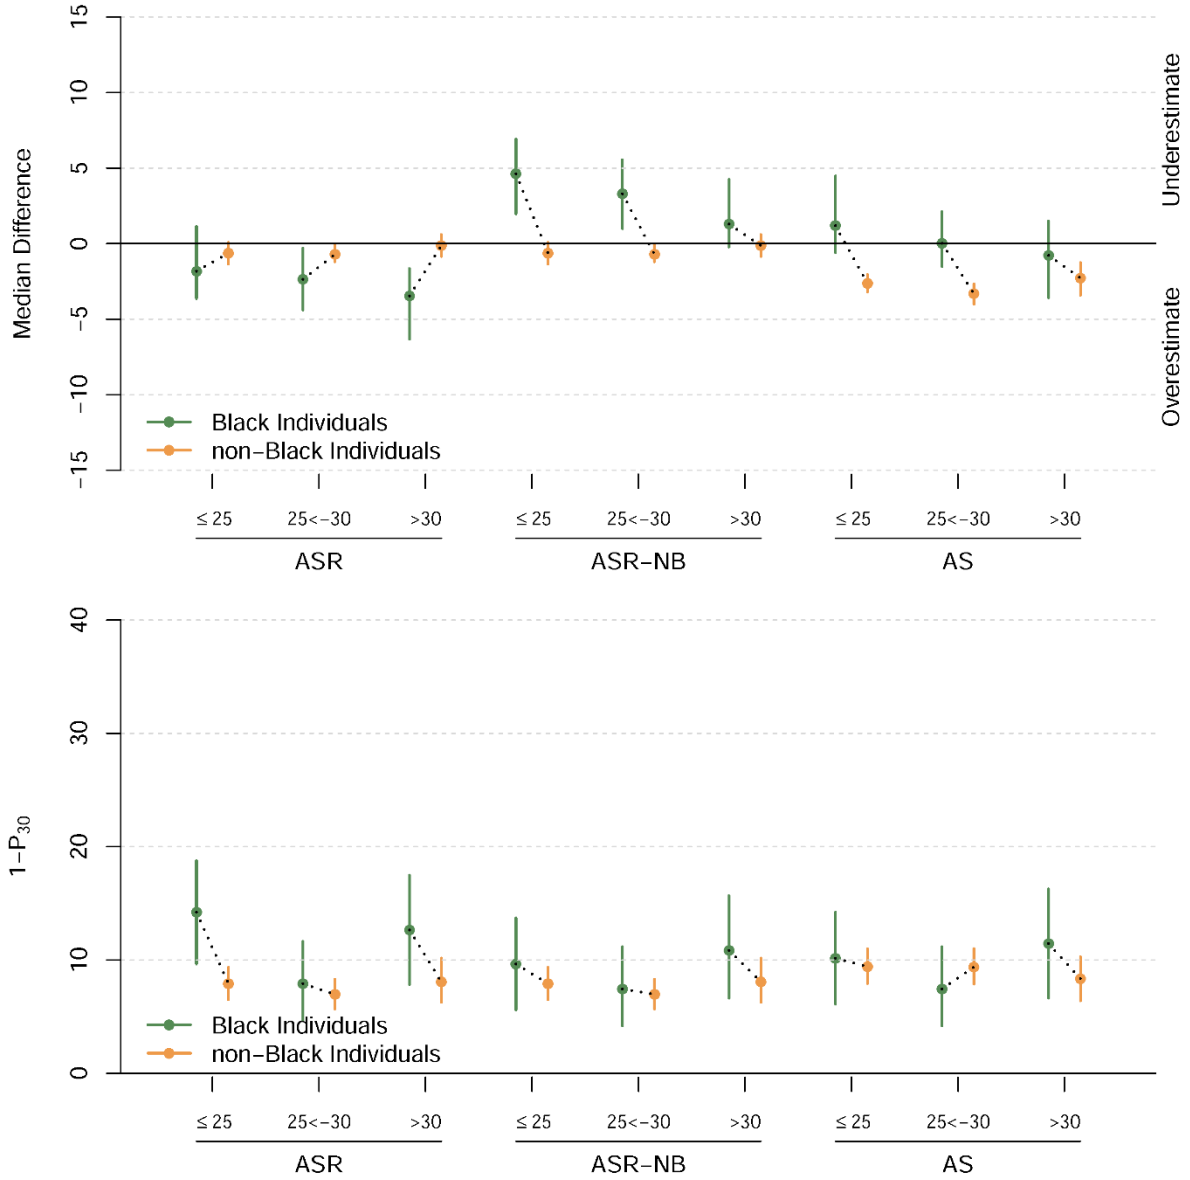



i. Performance of eGFR creatinine by BMI subgroups in 2009 external validation

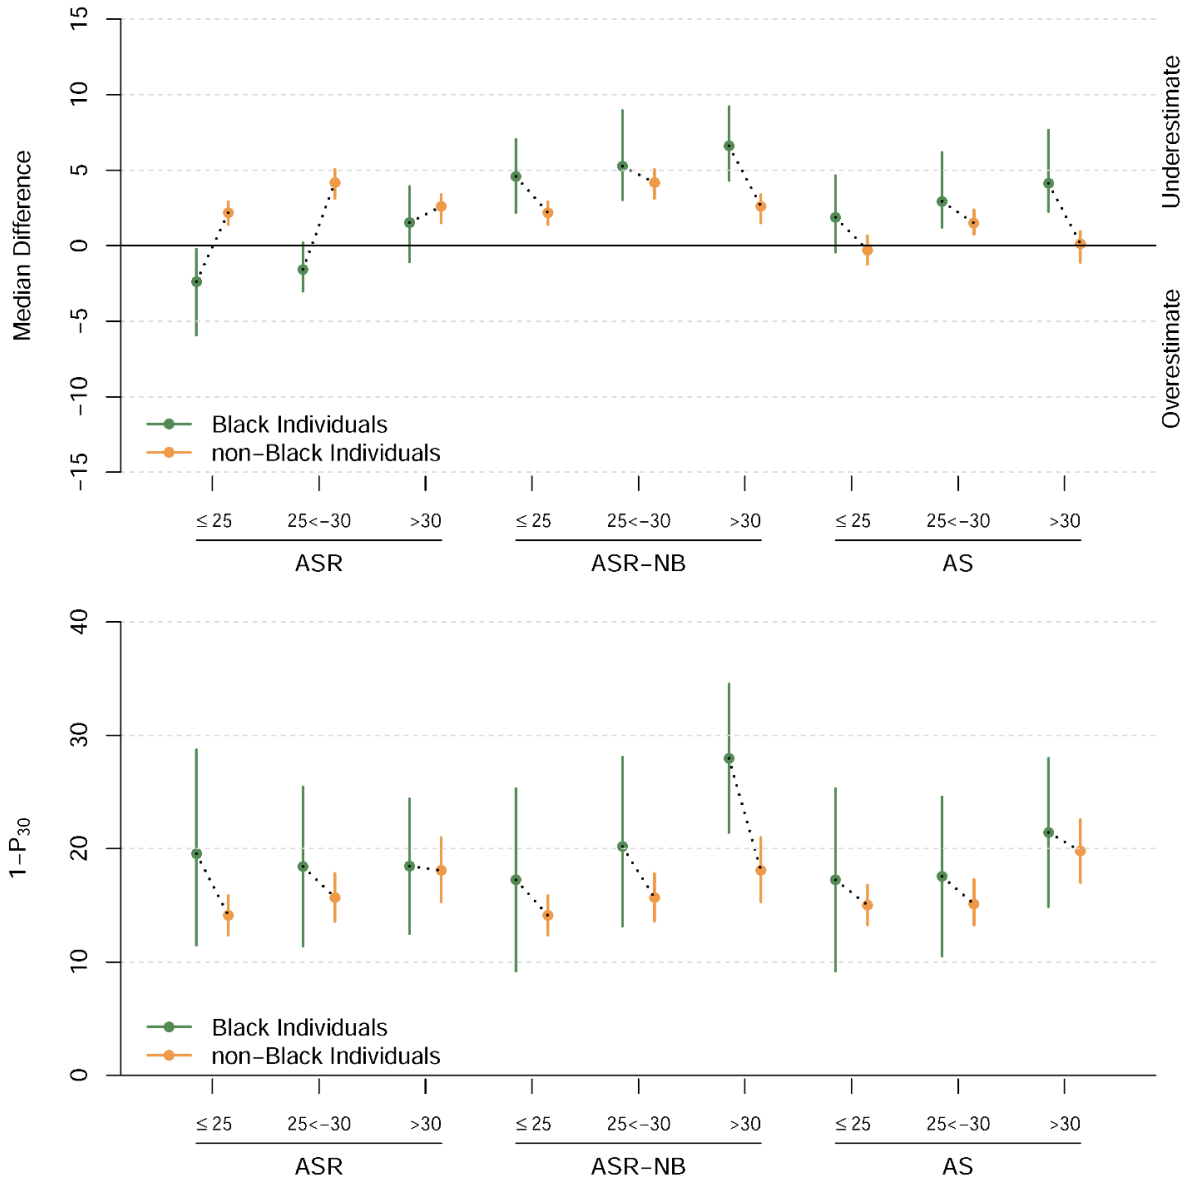

j. Performance of eGFR creatinine by sex subgroups in 2021 external validation

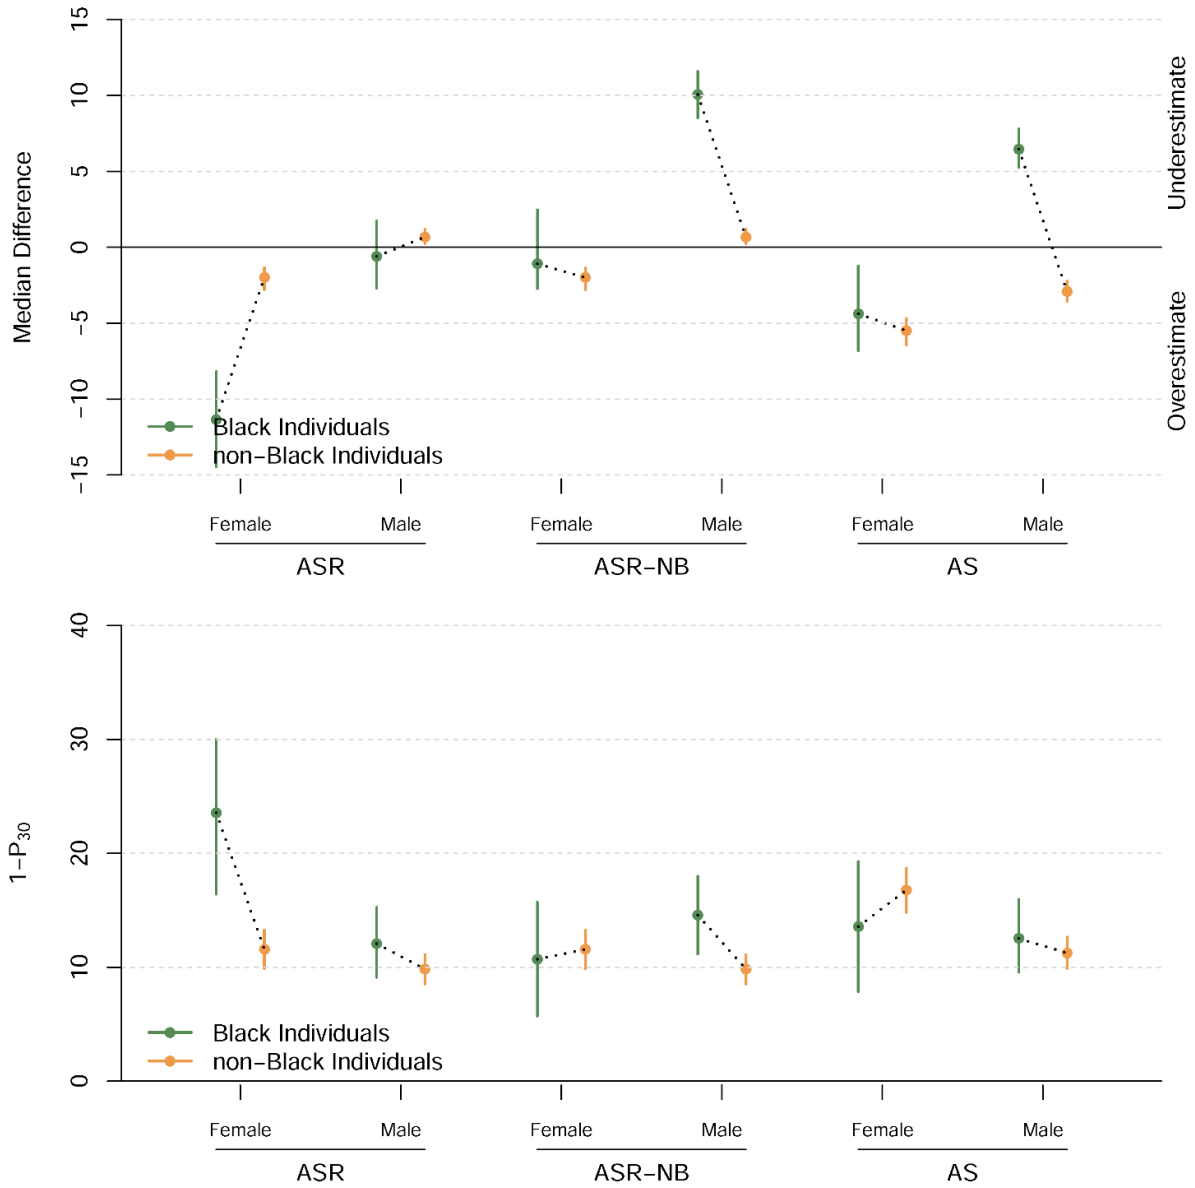

k. Performance of eGFR creatinine-cystatin C by sex subgroups in 2021 external validation

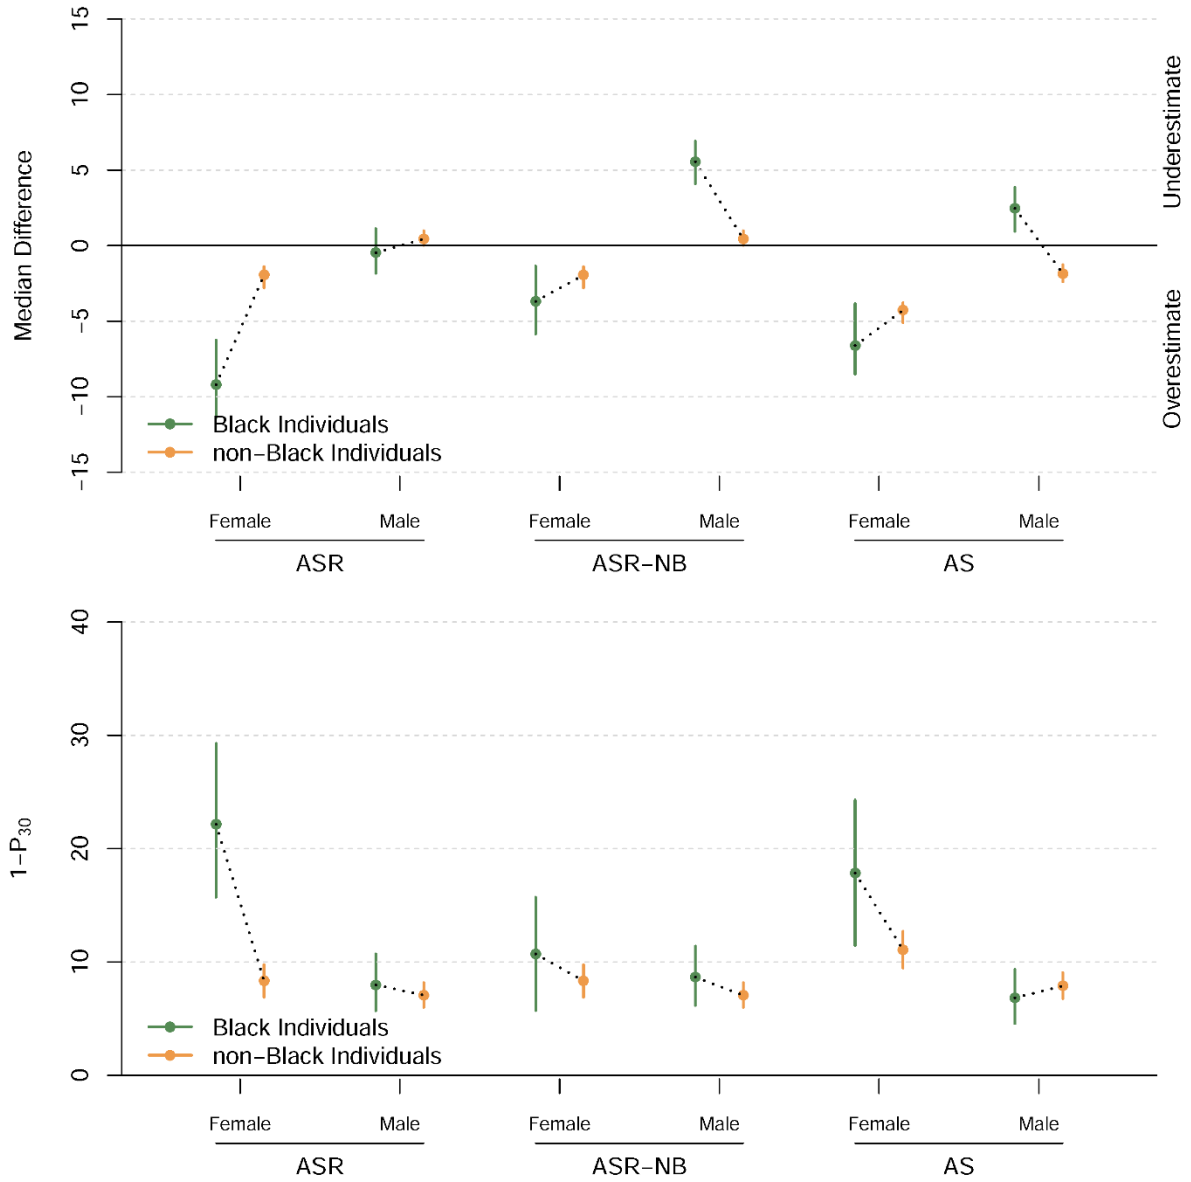

I. Performance of eGFR creatinine by sex subgroups in 2009 external validation

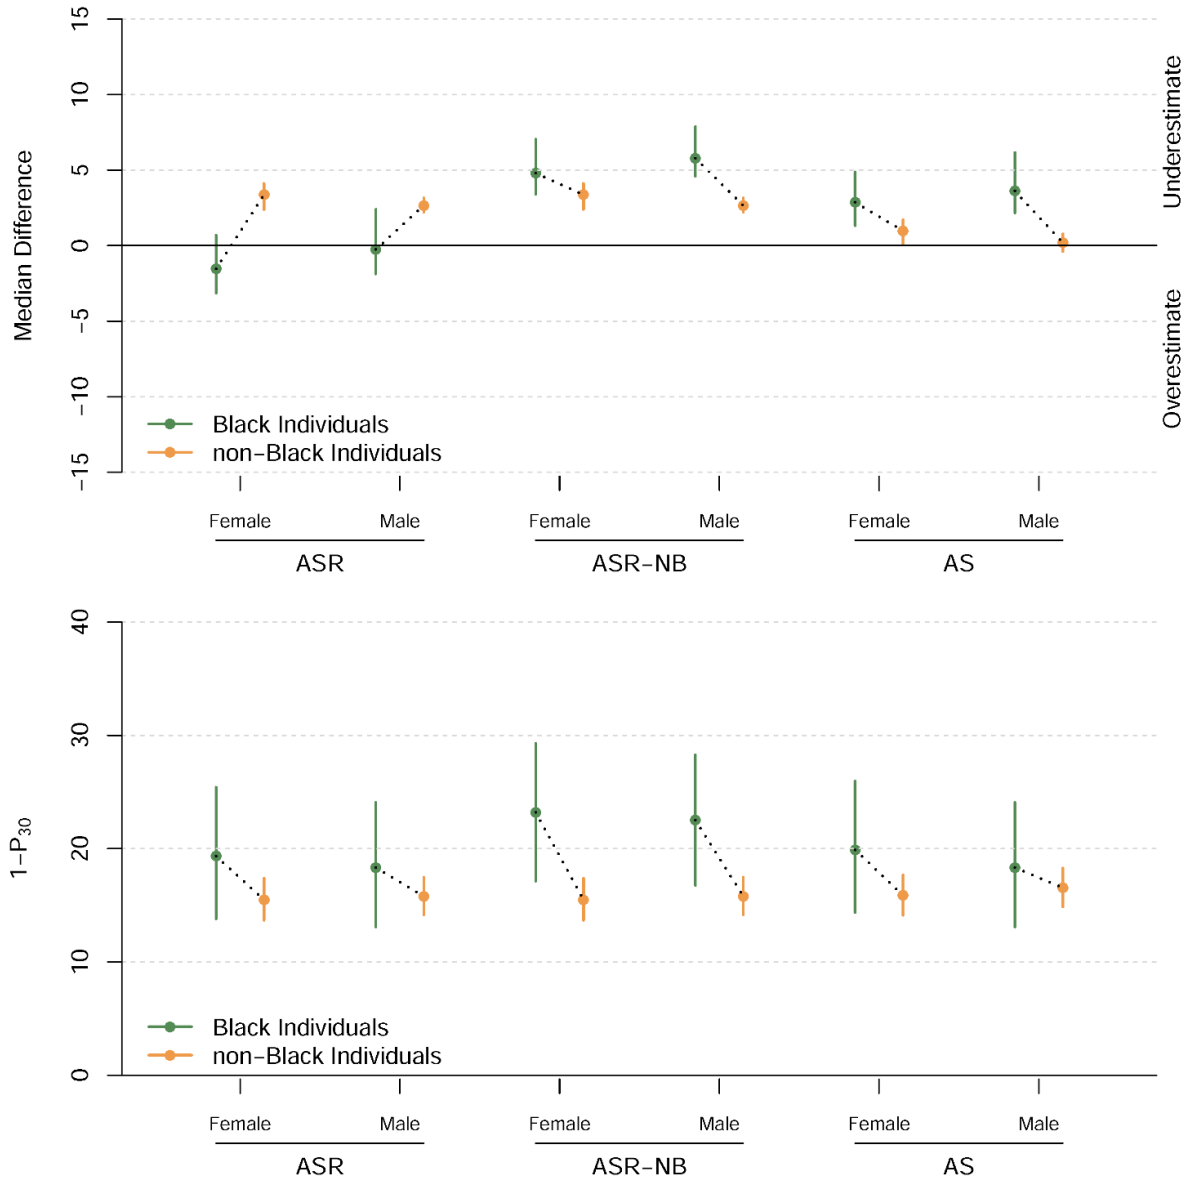

**Figure S11:** Distribution of the estimated glomerular filtration rate (eGFR) equations as calculated in National Health and Nutrition Examination Survey (NHANES 1999-2002)

a. Distribution of eGFR creatinine equations

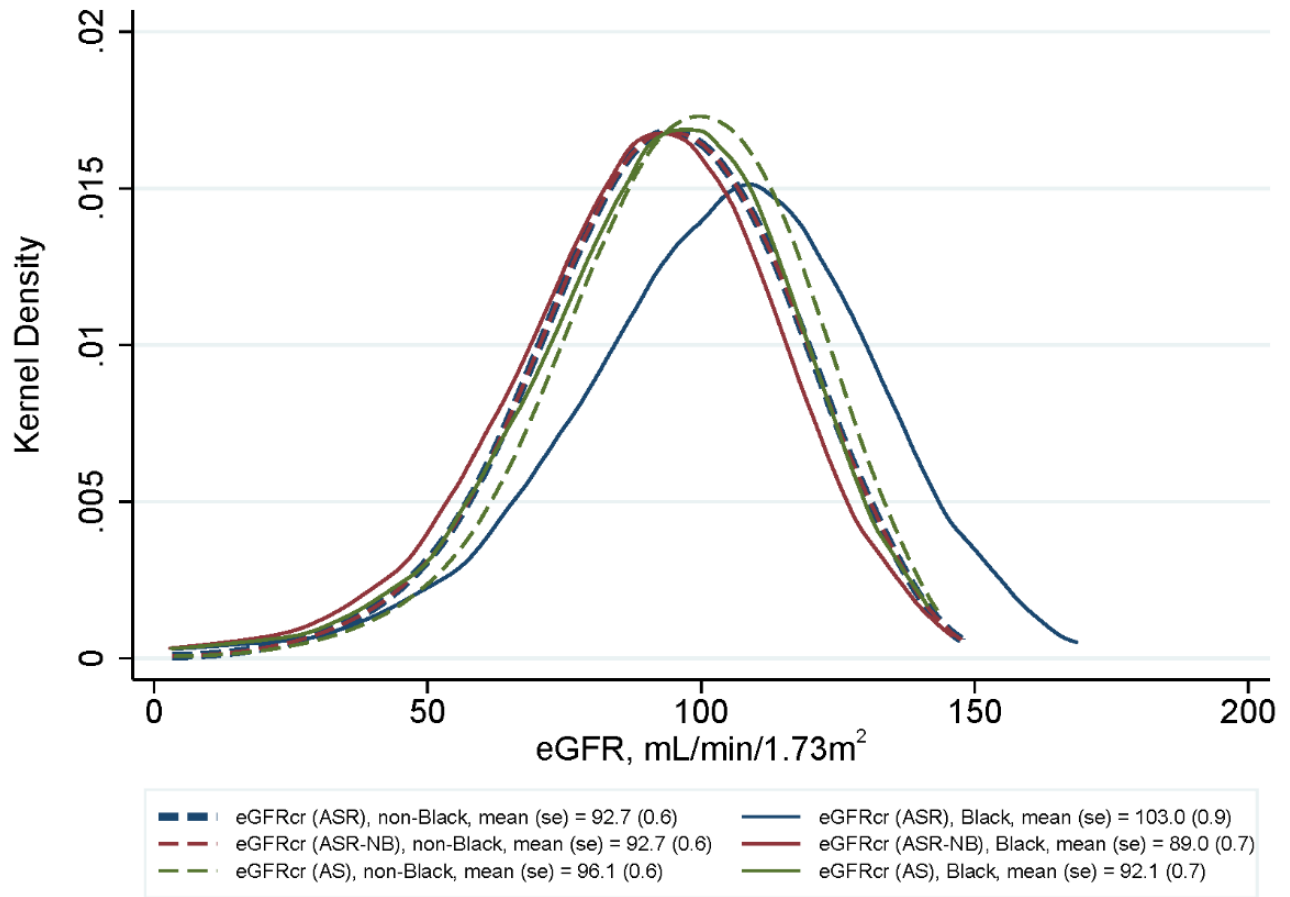

b. Distribution of eGFR cystatin C and creatinine-cystatin C equations

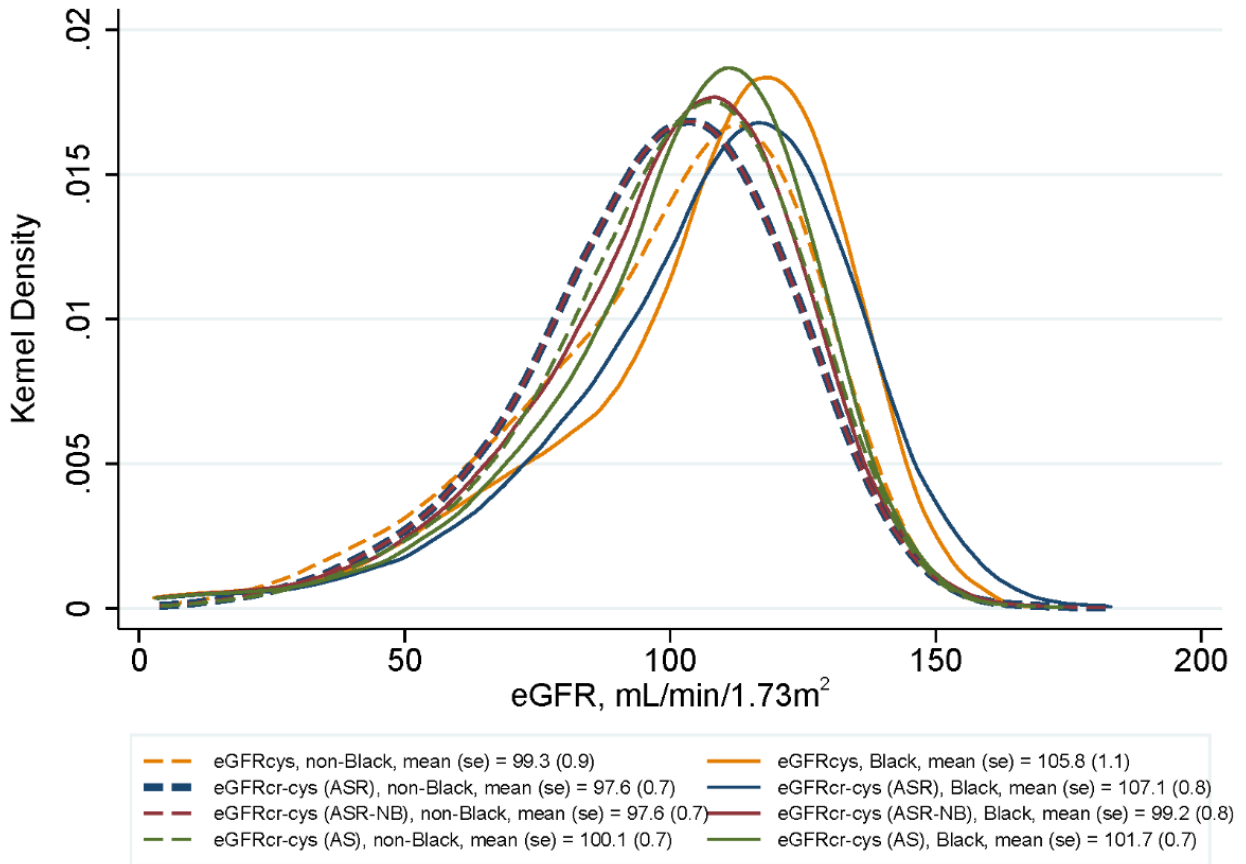

**Table S1:** Methods to measure GFR in each study in the 2009 and 2012 development and 2021 External Validation Datasets

| Study                    | Datasets                         |                                  |                                                       |
|--------------------------|----------------------------------|----------------------------------|-------------------------------------------------------|
|                          | 2009 Creatinine Development      | 2012 Cystatin C Development      | 2021 External Validation                              |
| AASK <sup>33</sup>       | Urinary clearance of iothalamate | Urinary clearance of iothalamate | -                                                     |
| MDRD <sup>34</sup>       | Urinary clearance of iothalamate | Urinary clearance of iothalamate | -                                                     |
| DCCT <sup>35</sup>       | Urinary clearance of iothalamate | Urinary clearance of iothalamate | -                                                     |
| DRDS <sup>36</sup>       | Urinary clearance of iothalamate | -                                | -                                                     |
| CSG <sup>37</sup>        | Urinary clearance of iothalamate | Urinary clearance of iothalamate | -                                                     |
| CRIC <sup>38</sup>       | Urinary clearance of iothalamate | Urinary clearance of iothalamate | -                                                     |
| CCF <sup>39</sup>        | Urinary clearance of iothalamate | Urinary clearance of iothalamate | -                                                     |
| Mayo <sup>40</sup>       | Urinary clearance of iothalamate | Urinary clearance of iothalamate | -                                                     |
| CRISP <sup>41</sup>      | -                                | Urinary clearance of iothalamate | -                                                     |
| Groningen <sup>42</sup>  | -                                | Urinary clearance of iothalamate | -                                                     |
| RASS <sup>43</sup>       |                                  | Urinary clearance of iothalamate | Plasma clearance of iohexol* <sup>12</sup>            |
| AGES <sup>44</sup>       | -                                | -                                | Plasma clearance of iohexol* <sup>12</sup>            |
| STENO <sup>45-48</sup>   | -                                | -                                | Plasma clearance of <sup>51</sup> Cr-EDTA             |
| UMN Donor                | -                                | -                                | Plasma clearance of iohexol* <sup>12</sup>            |
| Lund <sup>49</sup>       | -                                | -                                | Plasma clearance of iohexol* <sup>12</sup>            |
| HIV <sup>50</sup>        | -                                | -                                | Plasma clearance of iohexol* <sup>12</sup>            |
| MACS <sup>51</sup>       | -                                | -                                | Plasma clearance of iohexol* <sup>12</sup>            |
| PERL <sup>52</sup>       | -                                | -                                | Plasma clearance of iohexol* <sup>12</sup>            |
| MESA <sup>53</sup>       | -                                | -                                | Plasma clearance of iohexol* <sup>12</sup>            |
| ALTOLD <sup>54</sup>     | -                                | -                                | Plasma clearance of iohexol* <sup>12</sup>            |
| NephroTest <sup>55</sup> | -                                | -                                | Plasma and urinary clearance of <sup>51</sup> Cr-EDTA |

Abbreviations: MDRD Study, Modification of Diet in Renal Disease Study; AASK, African American Study of Kidney Diseases and Hypertension; DCCT, Diabetes Control and Complications Trial; DRDS, Diabetic Renal Disease Study; CSG, Collaborative Study Group: Captopril in Diabetic Nephropathy Study; CRIC, Chronic Renal Insufficiency Cohort Study; CCF, Cleveland Clinic Foundation; MACS, Multicenter Aids Cohort Study; PERL, Preventing Early Renal Loss in Diabetes; CCF, Cleveland Clinic Foundation; MESA, Multi-Ethnic Study of Atherosclerosis; ALTOLD, Assessing Long Term Outcome of Living Kidney Donors; CRIC, Chronic Renal Insufficiency Cohort Study; AGES, Age, Gene/Environment Susceptibility-Reykjavik Study; UMN, University of Minnesota; RASS, Renin Angiotensin System Study, <sup>51</sup>Cr-EDTA, <sup>51</sup>Cr-ethylenediaminetetraacetic acid

\* Calibrated to urinary clearance of iothalamate by reducing the assigned value of other methods by 5%, based on a systematic comparison of all methods. See supplemental methods for additional details

**Table S2:** Equations to estimate GFR with their filtration markers and demographics, and datasets used for their development and validation

| Equations                           | Predictors used in model fitting |                                        | Demographics used in computation of eGFR | Datasets            |                    |
|-------------------------------------|----------------------------------|----------------------------------------|------------------------------------------|---------------------|--------------------|
|                                     | Filtration Markers               | Demographics used in model development |                                          | Development Dataset | Validation Dataset |
| eGFRcr (ASR) ( <i>current</i> )     | Creatinine                       | Age, Sex, Race                         | Age, Sex, Race                           | 2009 Development    | 2021 Validation    |
| eGFRcr (ASR-NB) ( <i>new</i> )      | Creatinine                       | Age, Sex, Race                         | Age, Sex                                 | 2009 Development    | 2021 Validation    |
| eGFRcr (AS) ( <i>new</i> )          | Creatinine                       | Age, Sex                               | Age, Sex                                 | 2009 Development    | 2021 Validation    |
| eGFRcys (AS) ( <i>current</i> )     | Cystatin C                       | Age, Sex                               | Age, Sex                                 | 2012 Development    | 2021 Validation    |
| eGFRcr-cys (ASR) ( <i>current</i> ) | creatinine, cystatin C           | Age, Sex, Race                         | Age, Sex, Race                           | 2012 Development    | 2021 Validation    |
| eGFRcr-cys (ASR-NB) ( <i>new</i> )  | creatinine, cystatin C           | Age, Sex, Race                         | Age, Sex                                 | 2012 Development    | 2021 Validation    |
| eGFRcr-cys (AS) ( <i>new</i> )      | creatinine, cystatin C           | Age, Sex                               | Age, Sex                                 | 2012 Development    | 2021 Validation    |

Abbreviations: eGFR, estimated glomerular filtration rate; eGFRcr, estimating GFR using creatinine; eGFRcys, estimating GFR using cystatin c; eGFRcr-cys, estimating GFR using creatinine and cystatin c; ASR, age, sex and race; ASR-NB, age, sex and race, non-black



**Table S3:** Race group ascertainment by study

| Study | Race/ethnicity groups identified in cohort                                                                                                                                                                                                           | Ascertainment and notes                                          | Reference                         |
|-------|------------------------------------------------------------------------------------------------------------------------------------------------------------------------------------------------------------------------------------------------------|------------------------------------------------------------------|-----------------------------------|
| MDRD  | F04Q10: race/population group<br>White<br>Black<br>Hispanic<br>Asian<br>Native American<br>Pacific islander<br>Other<br>Unknown                                                                                                                      | Self-identified, No definition provided                          | Case Form 1 <sup>1</sup>          |
| AASK  | All African American                                                                                                                                                                                                                                 | Over the phone or chart review                                   | Case Form 16, 45, 51 <sup>2</sup> |
| DCCT  | Q: Predominant Race/Ethnicity<br>White, not of Hispanic Origins<br>Black, not of Hispanic Origins<br>Hispanic<br>Asian, or Pacific Islander<br>Native American or Alaskan Native                                                                     | Self-identified in Medical History and Physical Examination Form | Case Form 002.4 <sup>3</sup>      |
| DRDS  | Identified through Pima Indian tribal heritage                                                                                                                                                                                                       | Must be $\geq 1/2$ Pima Indian to participate in study           | Inclusion criteria <sup>4</sup>   |
| CSG   | Q: Race<br>Caucasian (not Hispanic)<br>Hispanic<br>Black<br>Oriental<br>American Indian<br>Polynesian/Filipino<br>Other, Specify                                                                                                                     | Self-identified in baseline demographic forms                    | Case Form <sup>5</sup>            |
| CRIC  | Q: Using the categories below, what do you consider to be your racial background? (check yes/no)<br>American Indian/Alaskan Native<br>Asian/Asian American<br>Black/African American<br>Native Hawaiian/Other<br>Pacific Islander<br>White/Caucasian | Race was Self-Identified in Demographic Information Form         | Case Form <sup>6</sup>            |

|                   |                                                                                                                                                                                                                                                                                                                                                                                                                                                                                                                                                                                                                                                                                                                                                                                                                                                                                                                                                                                                                |                                           |                     |
|-------------------|----------------------------------------------------------------------------------------------------------------------------------------------------------------------------------------------------------------------------------------------------------------------------------------------------------------------------------------------------------------------------------------------------------------------------------------------------------------------------------------------------------------------------------------------------------------------------------------------------------------------------------------------------------------------------------------------------------------------------------------------------------------------------------------------------------------------------------------------------------------------------------------------------------------------------------------------------------------------------------------------------------------|-------------------------------------------|---------------------|
|                   | <p>Q: If Asian/Asian American, do you consider yourself to be (check all that apply)</p> <ul style="list-style-type: none"> <li>Chinese</li> <li>East Indian/South Asian</li> <li>Japanese</li> <li>Filipino</li> <li>Korean Southeast Asian</li> <li>Other</li> <li>Don't know</li> </ul> <p>Q: If Black or African American, do you consider yourself to be (check all that apply)</p> <ul style="list-style-type: none"> <li>American</li> <li>African</li> <li>Haitian</li> <li>Jamaican</li> <li>Cuban</li> <li>Puerto Rican</li> <li>Dominican</li> <li>Other Caribbean Island Central/South American</li> <li>Other</li> <li>Don't know</li> </ul> <p>If you checked Hispanic/Latino, do you consider yourself to be (check all that apply)</p> <ul style="list-style-type: none"> <li>Mexican American/Mexican</li> <li>Central American</li> <li>South American</li> <li>Puerto Rican</li> <li>Cuban</li> <li>Dominican</li> <li>Spaniard or Portuguese</li> <li>Other</li> <li>Don't Know</li> </ul> |                                           |                     |
| CCF<br>CKD/Donor  | Race categories in *<br>White<br>Black<br>Hispanic<br>Asian<br>Native American                                                                                                                                                                                                                                                                                                                                                                                                                                                                                                                                                                                                                                                                                                                                                                                                                                                                                                                                 | Self-identified                           | Clinical Population |
| Mayo<br>CKD/Donor | Race categories in *<br>White<br>Black<br>Hispanic                                                                                                                                                                                                                                                                                                                                                                                                                                                                                                                                                                                                                                                                                                                                                                                                                                                                                                                                                             | Self-identified from patient registration | Clinical Population |

|           |                                                                                                                                                       |                                                                                                        |                                         |
|-----------|-------------------------------------------------------------------------------------------------------------------------------------------------------|--------------------------------------------------------------------------------------------------------|-----------------------------------------|
|           | Asian<br>Native American                                                                                                                              |                                                                                                        |                                         |
| CRISP     | Q4. Race/population<br>(circle one)<br>Caucasian<br>African American<br>Asian<br>Hispanic<br>Native American<br>Pacific Islander<br>Unknown<br>Other  | Race was identified on the Registration Form at the participant's first clinical visit during baseline | Case Form 25 <sup>7</sup>               |
| Groningen | Race categories in *<br>White<br>Black                                                                                                                | Self-identified                                                                                        | Clinical Population                     |
| RASS      | Race categories in *<br>Caucasian<br>Black                                                                                                            | Self-identified                                                                                        |                                         |
| STENO     | Race categories in *<br>White                                                                                                                         | Self-reported and noted in electronic medical record                                                   | Clinical Population                     |
| UMN Donor | Race categories in *<br>White<br>AA/Black<br>Asian<br>Indian<br>LatinX/Hispanic<br>American Indian/Alaskan<br>Indian                                  | Self-identified                                                                                        | Clinical Population                     |
| Lund      | White                                                                                                                                                 | Race not obtained - Swedish population                                                                 | Clinical Population                     |
| HIV       | Q: Race:<br>White<br>Black<br>Native American<br>Asian Japanese<br>Asian Chinese<br>Asian other<br>Other<br>Q: Ethnicity:<br>Hispanic<br>non-Hispanic | Self-identified on the Health Screening Visit Flow Sheet                                               | Case Form <sup>8</sup>                  |
| MACS      | Q: Which of the following best describes your racial background?<br>White, Non-Hispanic<br>White, Hispanic<br>Black, Non-Hispanic<br>Black, Hispanic  | Self-identified                                                                                        | Demographics questionnaire <sup>9</sup> |

|      |                                                                                                                                                                                                                                                                                                                                                                                                                                                                                                                                                                                  |                                                                                                                                                                                                                                                                                                                                                                                                                                                                                                                                     |                                          |
|------|----------------------------------------------------------------------------------------------------------------------------------------------------------------------------------------------------------------------------------------------------------------------------------------------------------------------------------------------------------------------------------------------------------------------------------------------------------------------------------------------------------------------------------------------------------------------------------|-------------------------------------------------------------------------------------------------------------------------------------------------------------------------------------------------------------------------------------------------------------------------------------------------------------------------------------------------------------------------------------------------------------------------------------------------------------------------------------------------------------------------------------|------------------------------------------|
|      | <p>American Indian or Alaskan Native</p> <p>Asian or Pacific Islander</p> <p>Other (write in option)</p>                                                                                                                                                                                                                                                                                                                                                                                                                                                                         |                                                                                                                                                                                                                                                                                                                                                                                                                                                                                                                                     |                                          |
| PERL | <p>Q: Ethnicity</p> <p>Hispanic or Latino</p> <p>Non-Hispanic or Non- Latino</p> <p>Prefer Not to answer</p> <p>Q: Race (Please select all that apply)</p> <p>American Indian or Alaska Native</p> <p>Asian</p> <p>Native Hawaiian or Other Pacific Islander</p> <p>African American or Black</p> <p>White</p> <p>Unknown or not reported</p> <p>Prefer not to answer</p>                                                                                                                                                                                                        | Self-identified                                                                                                                                                                                                                                                                                                                                                                                                                                                                                                                     | Case form <sup>10</sup>                  |
| MESA | <p>Q: Are you Spanish/Hispanic/Latino?<br/>If yes:</p> <p>Mexican, Chicano, Mexican-American</p> <p>Dominican</p> <p>Puerto Rican</p> <p>Cuban</p> <p>Q: Which of the following best describes you?</p> <p>African-American or Black</p> <p>Asian</p> <p>Chinese</p> <p>Filipino</p> <p>Japanese</p> <p>Korean</p> <p>Vietnamese</p> <p>Asian Indian</p> <p>Caucasian or White</p> <p>Native Hawaiian or other Pacific Islander</p> <p>Guamanian or Chamorro</p> <p>Samoan</p> <p>Micronesia</p> <p>Tahitian</p> <p>American Indian or Alaska Native</p> <p>Did not identify</p> | <p>As part of the study design, approximately 38% of the recruited participants are white, 28% African-American, 22% Hispanic, and 12% Asian, predominantly of Chinese descent.</p> <p>Race was identified as self-report on the Screening/Recruitment form. Separate questions for Hispanic other groups, and if respondent names a Spanish/Hispanic/Latino group instead of the race classification question, wording for interviewers to state that “Some Hispanics also identify themselves with one of these other groups”</p> | Screening/Recruitment form <sup>11</sup> |

|            |                                                                                 |                                             |                         |
|------------|---------------------------------------------------------------------------------|---------------------------------------------|-------------------------|
| AGES       | White                                                                           | Race not obtained – Icelandic population    | Clinical Population     |
| ALTOLD     | Q: Ethnicity<br>White<br>Black<br>Hispanic<br>Asian<br>Native American<br>Other | Race was identified on Screening Visit form | Case Form <sup>12</sup> |
| NephroTest | Race categories in *<br>White<br>Black<br>Asian                                 | Self-identified                             | Clinical Population     |
| DNA        | Race categories in *<br>White<br>Black<br>Hispanic<br>Asian<br>Native American  | Self-identified                             | Clinical Population     |
| Baylor     | Race categories in *<br>White<br>Black<br>Asian<br>Native American              | Self-identified                             | Clinical Population     |

\* Race categories in the dataset provided to CKD-EPI

1. The National Institute of Diabetes and Digestive and Kidney Diseases. Modification of Diet in Renal Disease, Index of Forms. [https://repository.niddk.nih.gov/media/studies/mdrd/Forms/MDRD\\_Forms.pdf](https://repository.niddk.nih.gov/media/studies/mdrd/Forms/MDRD_Forms.pdf). Accessed 2021.
2. The National Institute of Diabetes and Digestive and Kidney Diseases. African American Study of Kidney Disease and Hypertension Cohort Study, Index of Forms. <https://repository.niddk.nih.gov/studies/aask-cohort/forms/>. Accessed 2021.
3. Diabetes Control and Complications Trial. Baseline Medical History and Physical Examination Form. In: Inker LA, ed1987. Personal Communication.
4. Nelson RG, Bennett PH, Beck GJ, et al. Development and progression of renal disease in Pima Indians with non-insulin-dependent diabetes mellitus. Diabetic Renal Disease Study Group. New England Journal Medicine 1996;335:1636-42.
5. Collaborative Study Group: Captopril in Diabetic Nephropathy Study. Baseline Medical Inventory. In: Inker LA, ed1987. Personal Communication
6. The National Institute of Diabetes and Digestive and Kidney Diseases. Chronic Renal Insufficiency Cohort Study, Index of Forms, Demographic Information. [https://repository.niddk.nih.gov/media/studies/cric/forms/demographic\\_information.pdf](https://repository.niddk.nih.gov/media/studies/cric/forms/demographic_information.pdf). Accessed 2021.
7. The National Institute of Diabetes and Digestive and Kidney Diseases. Consortium for Radiologic Imaging Studies of Polycystic Kidney Disease, Index of Forms, Registration Form. [https://repository.niddk.nih.gov/media/studies/crisp1/Forms/CRISP\\_1\\_Forms/registration.pdf](https://repository.niddk.nih.gov/media/studies/crisp1/Forms/CRISP_1_Forms/registration.pdf). Accessed 2021.
8. Evaluation of the Performance of GFR Estimating Equations in HIV Positive Patients. Health Screening Visit Flow Sheet. In: Inker LA, ed2009. Personal Communication.
9. Multicenter AIDS Cohort Study. Demographic Form. [https://statepi.jhsph.edu/macs/Questionnaires/S2-3forms/v01\\_s2-3.pdf](https://statepi.jhsph.edu/macs/Questionnaires/S2-3forms/v01_s2-3.pdf)

10. Preventing Early Renal Loss in Diabetes. In: Inker LA, Couture SJ, ed2021. Personal Communication
11. The Multi-Ethnic Study of Atherosclerosis Study. Screening and Recruitment Form. <https://www.mesa-nhlbi.org/PublicDocs/010101-011231/MESABaselineExamForms/screener.pdf>. Accessed 2021.
12. The National Institute of Diabetes and Digestive and Kidney Diseases. Assessing Long Term Outcomes in Living Kidney Donors, Forms. <https://repository.niddk.nih.gov/studies/altold/>. Accessed 2021.

**Table S4:** Baseline characteristics, National Health and Nutrition Examination Survey

|                                                                                                                                                                                                                                                                                                                    | <b>Overall</b> | <b>Non-Black</b> | <b>Black</b> |
|--------------------------------------------------------------------------------------------------------------------------------------------------------------------------------------------------------------------------------------------------------------------------------------------------------------------|----------------|------------------|--------------|
| Unweighted N                                                                                                                                                                                                                                                                                                       | 4563           | 3728             | 835          |
| Mean (SE) serum creatinine, mg/dL                                                                                                                                                                                                                                                                                  | 0.90 (0.01)    | 0.89 (0.01)      | 1.00 (0.02)  |
| Mean (SE) age, year                                                                                                                                                                                                                                                                                                | 45.99 (0.40)   | 46.31 (0.45)     | 43.36 (0.68) |
| 20-44, % (SE)                                                                                                                                                                                                                                                                                                      | 51.5 (1.3)     | 50.7 (1.4)       | 58.3 (2.2)   |
| 45-64, % (SE)                                                                                                                                                                                                                                                                                                      | 31.7 (1.2)     | 31.9 (1.4)       | 30.0 (1.8)   |
| 65-80, % (SE)                                                                                                                                                                                                                                                                                                      | 16.8 (0.6)     | 17.4 (0.7)       | 11.7 (1.0)   |
| Female, % (SE)                                                                                                                                                                                                                                                                                                     | 52.2 (1.1)     | 51.8 (1.2)       | 55.8 (2.9)   |
| PIR tertile, % (SE)                                                                                                                                                                                                                                                                                                |                |                  |              |
| Tertile 1                                                                                                                                                                                                                                                                                                          | 16.9 (1.4)     | 15.5 (1.7)       | 27.8 (2.5)   |
| Tertile 2                                                                                                                                                                                                                                                                                                          | 27.9 (1.5)     | 27.7 (1.6)       | 29.7 (2.0)   |
| Tertile 3                                                                                                                                                                                                                                                                                                          | 47.7 (1.5)     | 49.7 (1.8)       | 31.9 (3.0)   |
| Missing                                                                                                                                                                                                                                                                                                            | 7.5 (0.9)      | 7.1 (1.0)        | 10.6 (1.2)   |
| Education, % (SE)                                                                                                                                                                                                                                                                                                  |                |                  |              |
| <High school                                                                                                                                                                                                                                                                                                       | 6.8 (0.5)      | 6.8 (0.6)        | 6.7 (1.0)    |
| High school degree                                                                                                                                                                                                                                                                                                 | 42.1 (1.7)     | 40.7 (1.9)       | 53.8 (2.0)   |
| >High school degree                                                                                                                                                                                                                                                                                                | 51.1 (1.7)     | 52.5 (1.9)       | 39.5 (2.2)   |
| Self-reported hypertension, % (SE)                                                                                                                                                                                                                                                                                 | 26.4 (1.2)     | 25.1 (1.2)       | 36.9 (3.0)   |
| Diabetes, % (SE)                                                                                                                                                                                                                                                                                                   | 8.4 (0.5)      | 7.8 (0.6)        | 13.3 (1.5)   |
| Mean (SE) urine ACR, mg/g, log10 scale                                                                                                                                                                                                                                                                             | 0.89 (0.01)    | 0.87 (0.01)      | 0.99 (0.03)  |
| <30, % (SE)                                                                                                                                                                                                                                                                                                        | 89.7 (0.7)     | 90.4 (0.7)       | 84.6 (1.5)   |
| 30-<300, % (SE)                                                                                                                                                                                                                                                                                                    | 8.6 (0.7)      | 8.1 (0.7)        | 12.3 (1.5)   |
| ≥300, % (SE)                                                                                                                                                                                                                                                                                                       | 1.7 (0.2)      | 1.5 (0.3)        | 3.1 (0.5)    |
| NHANES 1999-2002 adults (age 20+), with complete data of age, sex, race, serum creatinine and cystatin C. We also used the same methods to analyze NHANES 1999-2018 participants with creatinine data (N=49,015) to confirm limiting the analysis to individuals with cystatin C data did not change the inference |                |                  |              |
| SE, standard error; PIR, poverty income ratio                                                                                                                                                                                                                                                                      |                |                  |              |

**Table S5: Race ascertainment in NHANES and Chronic Kidney Disease-Prognosis Consortium**

| Cohorts                                                                                                                                                                                                                                  | Race/ethnicity groups identified in cohort                                                                                                                 | Ascertainment and notes                                                                                                                                                                                                                                                                                                                                                                                                                                                                                                                                                                                                                                                                                                                                                                                                                 | Reference                |
|------------------------------------------------------------------------------------------------------------------------------------------------------------------------------------------------------------------------------------------|------------------------------------------------------------------------------------------------------------------------------------------------------------|-----------------------------------------------------------------------------------------------------------------------------------------------------------------------------------------------------------------------------------------------------------------------------------------------------------------------------------------------------------------------------------------------------------------------------------------------------------------------------------------------------------------------------------------------------------------------------------------------------------------------------------------------------------------------------------------------------------------------------------------------------------------------------------------------------------------------------------------|--------------------------|
| NHANES 1999-2002                                                                                                                                                                                                                         | Race-ethnicity variable: RIDRETH1<br>Mexican-American<br>Other Hispanic<br>Non-Hispanic White<br>Non-Hispanic Black<br>Other Race – Including Multi-Racial | In this analysis, ‘RIDRETH1 Race/Ethnicity’ was used to identify black vs. non-black. Non-Hispanic black was called ‘black’ and all other race/ethnicity was called ‘non-black’.<br><br>Race-ethnicity<br>This race/ethnicity variable is derived by combining responses to questions on race and Hispanic origin. Respondents who self-identified as “Mexican American” were coded as such (i.e., RIDRETH1=1) regardless of their other race-ethnicity identities. Otherwise, self-identified “Hispanic” ethnicity would result in code “2, Other Hispanic” in the RIDRETH1 variable. All other non-Hispanic participants would then be categorized based on their self-reported races: non-Hispanic white (RIDRETH1=3), non-Hispanic black (RIDRETH1=4), and other non-Hispanic race including non-Hispanic multiracial (RIDRETH1=5). | NHANES link <sup>1</sup> |
| 1. National Health and Nutrition Examination Survey. 1999-2000 Data Documentation, Codebook, and Frequencies. DEMO <a href="https://wwwn.cdc.gov/Nchs/Nhanes/1999-2000/DEMO.htm">https://wwwn.cdc.gov/Nchs/Nhanes/1999-2000/DEMO.htm</a> |                                                                                                                                                            |                                                                                                                                                                                                                                                                                                                                                                                                                                                                                                                                                                                                                                                                                                                                                                                                                                         |                          |



**Table S6:** Characteristics of the creatinine 2009 development and internal validation dataset by study

|                                         | MDRD <sup>34</sup> |             |              | AASK <sup>33</sup> | DCCT <sup>35</sup> |              |               | DRDS <sup>36</sup>  |
|-----------------------------------------|--------------------|-------------|--------------|--------------------|--------------------|--------------|---------------|---------------------|
|                                         | Overall            | Black       | Non-Black    | Black (Overall)    | Overall            | Black        | Non-Black     | Non-Black (Overall) |
| N                                       | 1628               | 197 (12.1%) | 1431 (87.9%) | 1807 (100%)        | 1176               | 38 (3.2%)    | 1138 (96.8%)  | 190 (100%)          |
| Age, years                              | 50.6 (12.7)        | 48.9 (12.0) | 50.8 (12.8)  | 54.0 (10.5)        | 28.7 (5.7)         | 29.3 (5.4)   | 28.6 (5.7)    | 41.2 (10.9)         |
| <40                                     | 370 (22.7%)        | 53 (26.9%)  | 317 (22.2%)  | 179 (9.9%)         | 1176 (100%)        | 38 (100.0%)  | 1138 (100.0%) | 84 (44.2%)          |
| 40-65                                   | 1046 (64.3%)       | 132 (67.0%) | 914 (63.9%)  | 1356 (75.0 %)      | 0 (0.0%)           | 0 (0.0%)     | 0 (0.0%)      | 106 (55.8%)         |
| >65                                     | 212 (13.0%)        | 12 (6.1%)   | 200 (14.0%)  | 272 (15.1%)        | 0 (0.0%)           | 0 (0.0%)     | 0 (0.0%)      | 0 (0.0%)            |
| Female                                  | 645 (39.6%)        | 84 (42.6%)  | 561 (39.2%)  | 644 (35.6%)        | 541 (46.0%)        | 17 (44.7%)   | 524 (46.1%)   | 110 (57.9%)         |
| BMI, kg/m <sup>2</sup>                  | 27.2 (4.7)         | 28.7 (5.0)  | 27.0 (4.6)   | 30.6 (6.7)         | 24.5 (3.0)         | 24.1 (2.4)   | 24.5 (3.0)    | 34.3 (8.0)          |
| <20                                     | 58 (3.6%)          | 3 (1.5%)    | 55 (3.8%)    | 42 (2.3%)          | 47 (4.0%)          | 1 (2.6%)     | 46 (4.0%)     | 0 (0.0%)            |
| 20-<25                                  | 510 (31.3%)        | 45 (22.8%)  | 465 (32.5%)  | 301 (16.7%)        | 655 (55.7%)        | 24 (63.2%)   | 631 (55.5%)   | 18 (9.5%)           |
| 25-<30                                  | 649 (39.9%)        | 76 (38.6%)  | 573 (40.0%)  | 611 (33.8%)        | 418 (35.5%)        | 12 (31.6%)   | 406 (35.7%)   | 39 (20.5%)          |
| ≥30                                     | 411 (25.3%)        | 73 (37.1%)  | 338 (23.6%)  | 853 (47.2%)        | 56 (4.8%)          | 1 (2.6%)     | 55 (4.8%)     | 133 (70.0%)         |
| Diabetes                                | 99 (6.1%)          | 22 (11.2%)  | 77 (5.4%)    | 0 (0.0%)           | 1176 (100%)        | 38 (100%)    | 1138 (100%)   | 159 (83.7%)         |
| Kidney donor candidates                 | 0 (0.0%)           | 0 (0.0%)    | 0 (0.0%)     | 0 (0.0%)           | 0 (0.0%)           | 0 (0.0%)     | 0 (0.0%)      | 0 (0.0%)            |
| Measured GFR, ml/min/1.73m <sup>2</sup> | 39.8 (21.2)        | 43.6 (21.4) | 39.2 (21.1)  | 57.3 (23.6)        | 124.0 (20.5)       | 124.6 (21.3) | 124.0 (20.5)  | 118.2 (28.7)        |
| <30                                     | 621 (38.1%)        | 60 (30.5%)  | 561 (39.2%)  | 250 (13.8%)        | 1 (0.1%)           | 0 (0.0%)     | 1 (0.1%)      | 0 (0.0%)            |
| 30-<60                                  | 747 (45.9%)        | 91 (46.2%)  | 656 (45.8%)  | 765 (42.3%)        | 3 (0.3%)           | 0 (0.0%)     | 3 (0.3%)      | 3 (1.6%)            |
| 60-<90                                  | 226 (13.9%)        | 44 (22.3%)  | 182 (12.7%)  | 639 (35.4%)        | 29 (2.5%)          | 2 (5.3%)     | 27 (2.4%)     | 31 (16.3%)          |
| ≥90                                     | 34 (2.1%)          | 2 (1.0%)    | 32 (2.2%)    | 153 (8.5%)         | 1143 (97.2%)       | 36 (94.7%)   | 1107 (97.3%)  | 156 (82.1%)         |
| Creatinine, mg/dL                       | 2.14 (1.11)        | 2.28 (1.24) | 2.12 (1.09)  | 1.70 (0.81)        | 0.76 (0.13)        | 0.78 (0.17)  | 0.76 (0.13)   | 0.67 (0.17)         |

|                                         | CSG <sup>37</sup> |             |             | CRIC <sup>38</sup> |             |             | CCF CKD <sup>39</sup> |             |             |
|-----------------------------------------|-------------------|-------------|-------------|--------------------|-------------|-------------|-----------------------|-------------|-------------|
|                                         | Overall           | Black       | Non-Black   | Overall            | Black       | Non-Black   | Overall               | Black       | Non-Black   |
| N                                       | 399               | 32 (8.0%)   | 367 (92.0%) | 669                | 289 (43.2%) | 380 (56.8%) | 1037                  | 169 (16.3%) | 868 (83.7%) |
| Age, years                              | 34.1 (7.6)        | 37.2 (9.8)  | 33.8 (7.3)  | 54.9 (13.4)        | 54.9 (13.1) | 54.8 (13.7) | 54.3 (15.4)           | 54.8 (14.3) | 54.2 (15.7) |
| <40                                     | 298 (74.7%)       | 14 (43.8%)  | 284 (77.4%) | 112 (16.7%)        | 46 (15.9%)  | 66 (17.4%)  | 195 (18.8%)           | 28 (16.6%)  | 167 (19.2%) |
| 40-65                                   | 101 (25.3%)       | 18 (56.3%)  | 83 (22.6%)  | 373 (55.8%)        | 166 (57.4%) | 207 (54.5%) | 575 (55.5%)           | 105 (62.1%) | 470 (54.2%) |
| >65                                     | 0 (0.0%)          | 0 (0.0%)    | 0 (0.0%)    | 184 (27.5%)        | 77 (26.6%)  | 107 (28.2%) | 267 (25.8%)           | 36 (21.3%)  | 231 (26.6%) |
| Female                                  | 186 (46.6%)       | 17 (53.1%)  | 169 (46.1%) | 307 (45.9%)        | 143 (49.5%) | 164 (43.2%) | 438 (42.2%)           | 83 (49.1%)  | 355 (40.9%) |
| BMI, kg/m <sup>2</sup>                  | 25.2 (4.1)        | 27.5 (6.8)  | 25.0 (3.8)  | 31.7 (7.7)         | 33.5 (7.5)  | 30.3 (7.5)  | 28.4 (6.3)            | 30.2 (7.1)  | 28.0 (6.1)  |
| <20                                     | 21 (5.3%)         | 1 (3.1%)    | 20 (5.5%)   | 21 (3.1%)          | 7 (2.4%)    | 14 (3.7%)   | 56 (5.4%)             | 5 (3.0%)    | 51 (5.9%)   |
| 20-<25                                  | 204 (51.1%)       | 12 (37.5%)  | 192 (52.3%) | 100 (15.0%)        | 26 (9.0%)   | 74 (19.5%)  | 282 (27.2%)           | 36 (21.3%)  | 246 (28.3%) |
| 25-<30                                  | 137 (34.3%)       | 12 (37.5%)  | 125 (34.1%) | 190 (28.4%)        | 66 (22.8%)  | 124 (32.6%) | 341 (32.9%)           | 52 (30.8%)  | 289 (33.3%) |
| ≥30                                     | 37 (9.3%)         | 7 (21.9%)   | 30 (8.2%)   | 358 (53.5%)        | 190 (65.7%) | 168 (44.2%) | 358 (34.5%)           | 76 (45.0%)  | 282 (32.5%) |
| Diabetes                                | 399 (100%)        | 32 (100%)   | 367 (100%)  | 302 (45.1%)        | 136 (47.1%) | 166 (43.7%) | 249 (24.0%)           | 69 (40.8%)  | 180 (20.7%) |
| Kidney donor candidates                 | 0 (0.0%)          | 0 (0.0%)    | 0 (0.0%)    | 0 (0.0%)           | 0 (0.0%)    | 0 (0.0%)    | 0 (0.0%)              | 0 (0.0%)    | 0 (0.0%)    |
| Measured GFR, ml/min/1.73m <sup>2</sup> | 76.9 (32.0)       | 58.8 (26.1) | 78.5 (32.0) | 49.6 (21.4)        | 47.9 (20.6) | 50.9 (21.9) | 34.6 (28.1)           | 27.4 (26.6) | 36.0 (28.2) |
| <30                                     | 19 (4.8%)         | 6 (18.8%)   | 13 (3.5%)   | 123(18.4%)         | 66 (22.8%)  | 57 (15.0%)  | 625 (60.3%)           | 131 (77.5%) | 494 (56.9%) |
| 30-<60                                  | 108 (27.1%)       | 9 (28.1%)   | 99 (27.0%)  | 361 (54.0%)        | 144 (49.8%) | 217 (57.1%) | 211 (20.4%)           | 16 (9.5%)   | 195 (22.5%) |
| 60-<90                                  | 145 (36.3%)       | 12 (37.5%)  | 133 (36.2%) | 151 (22.6%)        | 69 (23.9%)  | 82 (21.6%)  | 144 (13.9%)           | 12 (7.1%)   | 132 (15.2%) |
| ≥90                                     | 127 (31.8%)       | 5 (15.6%)   | 122 (33.2%) | 34 (5.1%)          | 10 (3.5%)   | 24 (6.3%)   | 57 (5.5%)             | 10 (5.9%)   | 47 (5.4%)   |
| Creatinine, mg/dL                       | 1.26 (0.40)       | 1.44 (0.44) | 1.25 (0.39) | 1.73 (0.59)        | 1.88 (0.65) | 1.62 (0.52) | 2.90 (1.80)           | 3.76 (2.00) | 2.74 (1.71) |

|                                         | CCF Donors <sup>39</sup> |              |              | Mayo CKD <sup>40</sup> | Mayo Donors <sup>40</sup> |             |              |
|-----------------------------------------|--------------------------|--------------|--------------|------------------------|---------------------------|-------------|--------------|
|                                         | Overall                  | Black        | Non-Black    | Overall (Non-Black)    | Overall                   | Black       | Non-Black    |
| N                                       | 457                      | 63 (13.8%)   | 394 (86.2%)  | 318 (100.0%)           | 573                       | 6 (1.0%)    | 567 (99.0%)  |
| Age, years                              | 41.8 (10.1)              | 38.2 (10.1)  | 42.3 (10.0)  | 53.2 (14.5)            | 41.4 (11.2)               | 42.8 (18.6) | 41.4 (11.1)  |
| <40                                     | 191 (41.8%)              | 36 (57.1%)   | 155 (39.3%)  | 60 (18.9%)             | 256 (44.7%)               | NS          | 253 (44.6%)  |
| 40-65                                   | 266 (58.2%)              | 27 (42.9%)   | 239 (60.7%)  | 183 (57.6%)            | 303 (52.9%)               |             | 300 (52.9%)  |
| >65                                     | 0 (0.0%)                 | 0 (0.0%)     | 0 (0.0%)     | 75 (23.6%)             | 14 (2.4%)                 |             | 14 (2.5%)    |
| Female                                  | 280 (61.3%)              | 37 (58.7%)   | 243 (61.7%)  | 125 (39.3%)            | 330 (57.6%)               | NS          | 329 (58.0%)  |
| BMI, kg/m <sup>2</sup>                  | 27.2 (4.3)               | 27.8 (3.9)   | 27.1 (4.3)   | 28.8 (6.2)             | 27.8 (5.3)                | 30.9 (2.7)  | 27.8 (5.3)   |
| <20                                     | 14 (3.1%)                | 1 (1.6%)     | 13 (3.3%)    | 10 (3.1%)              | 16 (2.8%)                 | NS          | 16 (2.8%)    |
| 20-<25                                  | 136 (29.8%)              | 13 (20.6%)   | 123 (31.2%)  | 79 (24.8%)             | 161 (28.1%)               |             | 161 (28.4%)  |
| 25-<30                                  | 187 (40.9%)              | 30 (47.6%)   | 157 (39.9%)  | 116 (36.5%)            | 235 (41.0%)               |             | 232 (40.9%)  |
| ≥30                                     | 120 (26.3%)              | 19 (30.2%)   | 101 (25.6%)  | 113 (35.5%)            | 161 (28.1%)               |             | 158 (27.9%)  |
| Diabetes                                | 0 (0.0%)                 | 0 (0.0%)     | 0 (0.0%)     | 22 (6.9%)              | 0 (0.0%)                  | NS          | 0 (0.0%)     |
| Kidney donor candidates                 | 457 (100.0%)             | 63 (100.0%)  | 394 (100.0%) | 0 (0%)                 | 573 (100.0%)              | 6 (100.0%)  | 567 (100.0%) |
| Measured GFR, ml/min/1.73m <sup>2</sup> | 106.0 (18.4)             | 103.8 (18.4) | 106.3 (18.4) | 48.5 (25.2)            | 101.2 (16.5)              | 99.0 (18.5) | 101.2 (16.5) |
| <30                                     | 0 (0.0%)                 | 0 (0.0%)     | 0 (0.0%)     | 83 (26.1%)             | 0 (0.0%)                  | NS          | 0 (0.0%)     |
| 30-<60                                  | 2 (0.4%)                 | 1 (1.6%)     | 1 (0.3%)     | 134 (42.1%)            | 0 (0.0%)                  |             | 0 (0.0%)     |
| 60-<90                                  | 78 (17.1%)               | 13 (20.6%)   | 65 (16.5%)   | 76 (23.9%)             | 150 (26.2%)               |             | 148 (26.1%)  |
| ≥90                                     | 377 (82.5%)              | 49 (77.8%)   | 328 (83.3%)  | 25 (7.9%)              | 423 (73.8%)               |             | 419 (73.9%)  |
| Creatinine, mg/dL                       | 0.83 (0.16)              | 0.89 (0.17)  | 0.82 (0.16)  | 1.72 (0.97)            | 0.84 (0.16)               | 0.88 (0.12) | 0.84 (0.16)  |

Abbreviations: MDRD Study, Modification of Diet in Renal Disease Study; AASK, African American Study of Kidney Diseases and Hypertension; DCCT, Diabetes Control and Complications Trial; DRDS, Diabetic Renal Disease Study; CSG, Collaborative Study Group: Captopril in Diabetic Nephropathy Study; CRIC, Chronic Renal Insufficiency Cohort Study; CCF, Cleveland Clinic Foundation; GFR, glomerular filtration rate; BMI, body mass index; SD, standard deviation; Scr, serum creatinine, NS, number too small for the group or subgroup to present descriptive data. To convert GFR from mL/min/1.73 m<sup>2</sup> to mL/s/m<sup>2</sup>, multiply by 0.0167. To convert serum creatinine from mg/dL to μmol/L, multiply by 88.4.

**Table S7:** Characteristics of the cystatin 2012 development and internal validation dataset by study

|                                         | MDRD <sup>34</sup> |             |             | AASK <sup>33</sup> | CRIC <sup>38</sup> |             |             |
|-----------------------------------------|--------------------|-------------|-------------|--------------------|--------------------|-------------|-------------|
|                                         | Overall            | Black       | Non-Black   | Black (Overall)    | Overall            | Black       | Non-Black   |
| N                                       | 1046               | 102 (9.8%)  | 944 (90.2%) | 1647 (100.0%)      | 653                | 283 (43.3%) | 370 (56.7%) |
| Age, years                              | 51.5 (12.5)        | 50.4 (11.7) | 51.6 (12.6) | 53.9 (10.5)        | 54.9 (13.5)        | 54.9 (13.1) | 54.8 (13.8) |
| <40                                     | 215 (20.6%)        | 25 (24.5%)  | 190 (20.1%) | 168 (10.2%)        | 115 (17.6%)        | 47 (16.6%)  | 68 (18.4%)  |
| 40-65                                   | 660 (63.1%)        | 68 (66.7%)  | 592 (62.7%) | 1211 (73.5%)       | 345 (52.8%)        | 153 (54.1%) | 192 (51.9%) |
| >65                                     | 171 (16.4%)        | 9 (8.8%)    | 162 (17.2%) | 268 (16.3%)        | 193 (29.6%)        | 83 (29.3%)  | 110 (29.7%) |
| Female                                  | 408 (39.0%)        | 44 (43.1%)  | 364 (38.6%) | 592 (35.9%)        | 301 (46.1%)        | 140 (49.5%) | 161 (43.5%) |
| BMI, kg/m <sup>2</sup>                  | 27.1 (4.4)         | 28.8 (5.1)  | 26.9 (4.3)  | 30.7 (6.7)         | 31.7 (7.7)         | 33.5 (7.5)  | 30.3 (7.6)  |
| <20                                     | 40 (3.8%)          | 3 (2.9%)    | 37 (3.9%)   | 38 (2.3%)          | 21 (3.2%)          | 7 (2.5%)    | 14 (3.8%)   |
| 20-<25                                  | 327 (31.3%)        | 25 (24.5%)  | 302 (32.0%) | 269 (16.3%)        | 98 (15.0%)         | 25 (8.8%)   | 73 (19.7%)  |
| 25-<30                                  | 431 (41.2%)        | 34 (33.3%)  | 397 (42.1%) | 555 (33.7%)        | 185 (28.3%)        | 65 (23.0%)  | 120 (32.4%) |
| ≥30                                     | 248 (23.7%)        | 40 (39.2%)  | 208 (22.0%) | 785 (47.7%)        | 349 (53.5%)        | 186 (65.7%) | 163 (44.1%) |
| Diabetes                                | 60 (5.7%)          | 15 (14.7%)  | 45 (4.8%)   | 0 (0.0%)           | 294 (45.0%)        | 133 (47.0%) | 161 (43.5%) |
| Kidney donor candidates                 | 0 (0.0%)           | 0 (0.0%)    | 0 (0.0%)    | 0 (0.0%)           | 0 (0.0%)           | 0 (0.0%)    | 0 (0.0%)    |
| Measured GFR, ml/min/1.73m <sup>2</sup> | 33.1 (14.2)        | 35.6 (15.4) | 32.8 (14.1) | 57.1 (23.4)        | 49.8 (21.5)        | 48.1 (20.5) | 51.0 (22.1) |
| <30                                     | 479 (45.8%)        | 38 (37.3%)  | 441 (46.7%) | 223 (13.5%)        | 120 (18.4%)        | 64 (22.6%)  | 56 (15.1%)  |
| 30-<60                                  | 532 (50.9%)        | 57 (55.9%)  | 475 (50.3%) | 705 (42.8%)        | 351 (53.8%)        | 141 (49.8%) | 210 (56.8%) |
| 60-<90                                  | 34 (3.3%)          | 7 (6.9%)    | 27 (2.9%)   | 584 (35.5%)        | 148 (22.7%)        | 68 (24.0%)  | 80 (21.6%)  |
| ≥90                                     | 1 (0.1%)           | 0 (0.0%)    | 1 (0.1%)    | 135 (8.2%)         | 34 (5.2%)          | 10 (3.5%)   | 24 (6.5%)   |
| Creatinine, mg/dL                       | 2.34 (1.09)        | 2.55 (1.24) | 2.32 (1.07) | 1.71 (0.82)        | 1.73 (0.59)        | 1.88 (0.65) | 1.62 (0.52) |
| Cystatin C, mg/L                        | 2.08 (0.69)        | 2.02 (0.78) | 2.09 (0.68) | 1.46 (0.61)        | 1.61 (0.52)        | 1.65 (0.55) | 1.57 (0.50) |

|                                         | DCCT <sup>35</sup> |              |              | CSG <sup>37</sup> |             |             | CRISP <sup>41</sup> |              |             |
|-----------------------------------------|--------------------|--------------|--------------|-------------------|-------------|-------------|---------------------|--------------|-------------|
|                                         | Overall            | Black        | Non-Black    | Overall           | Black       | Non-Black   | Overall             | Black        | Non-Black   |
| N                                       | 985                | 27 (2.7%)    | 958 (97.3%)  | 285               | 23 (8.1%)   | 262 (91.9%) | 197                 | 21 (10.7%)   | 176 (89.3%) |
| Age, years                              | 28.7 (5.7)         | 29.2 (5.5)   | 28.7 (5.7)   | 34.0 (7.8)        | 36.1 (10.9) | 33.8 (7.5)  | 33.5 (7.8)          | 34.2 (8.9)   | 33.5 (7.7)  |
| <40                                     | 985 (100%)         | 27 (100%)    | 958 (100%)   | 210 (73.7%)       | 10 (43.5%)  | 200 (76.3%) | 145 (73.6%)         | 13 (61.9%)   | 132 (75.0%) |
| 40-65                                   | 0 (0.0%)           | 0 (0.0%)     | 0 (0.0%)     | 75 (26.3%)        | 13 (56.5%)  | 62 (23.7%)  | 52 (26.4%)          | 8 (38.1%)    | 44 (25.0%)  |
| >65                                     | 0 (0.0%)           | 0 (0.0%)     | 0 (0.0%)     | 0 (0.0%)          | 0 (0.0%)    | 0 (0.0%)    | 0 (0.0%)            | 0 (0.0%)     | 0 (0.0%)    |
| Female                                  | 450 (45.7%)        | 10 (37.0%)   | 440 (45.9%)  | 126 (44.2%)       | 11 (47.8%)  | 115 (43.9%) | 117 (59.4%)         | 16 (76.2%)   | 101 (57.4%) |
| BMI, kg/m <sup>2</sup>                  | 24.5 (3.0)         | 23.9 (2.2)   | 24.5 (3.0)   | 25.8 (5.6)        | 26.4 (8.7)  | 25.7 (5.3)  | 26.1 (5.3)          | 26.7 (5.3)   | 26.1 (5.3)  |
| <20                                     | 37 (3.8%)          | 1 (3.7%)     | 36 (3.8%)    | 42 (14.8%)        | 3 (13.0%)   | 39 (14.9%)  | 15 (7.6%)           | 1 (4.8%)     | 14 (8.0%)   |
| 20-<25                                  | 557 (56.6%)        | 18 (66.7%)   | 539 (56.3%)  | 94 (33.1%)        | 9 (39.1%)   | 85 (32.6%)  | 78 (39.6%)          | 6 (28.6%)    | 72 (40.9%)  |
| 25-<30                                  | 343 (34.8%)        | 8 (29.6%)    | 335 (35.0%)  | 98 (34.5%)        | 7 (30.4%)   | 91 (34.9%)  | 69 (35.0%)          | 10 (47.6%)   | 59 (33.5%)  |
| ≥30                                     | 48 (4.9%)          | 0 (0.0%)     | 48 (5.0%)    | 50 (17.6%)        | 4 (17.4%)   | 46 (17.6%)  | 35 (17.8%)          | 4 (19.1%)    | 31 (17.6%)  |
| Diabetes                                | 985 (100%)         | 27 (100%)    | 958 (100%)   | 285 (100%)        | 23 (100%)   | 262 (100%)  | 0 (0.0%)            | 0 (0.0%)     | 0 (0.0%)    |
| Kidney donor candidates                 | 0 (0.0%)           | 0 (0.0%)     | 0 (0.0%)     | 0 (0.0%)          | 0 (0.0%)    | 0 (0.0%)    | 0 (0.0%)            | 0 (0.0%)     | 0 (0.0%)    |
| Measured GFR, ml/min/1.73m <sup>2</sup> | 123.6 (19.5)       | 121.6 (21.3) | 123.7 (19.5) | 71.8 (32.7)       | 67.1 (38.9) | 72.2 (32.2) | 95.2 (23.4)         | 102.1 (26.4) | 94.4 (23.0) |
| <30                                     | 1 (0.1%)           | 0 (0.0%)     | 1 (0.1%)     | 36 (12.6%)        | 4 (17.4%)   | 32 (12.2%)  | 0 (0.0%)            | 0 (0.0%)     | 0 (0.0%)    |
| 30-<60                                  | 1 (0.1%)           | 0 (0.0%)     | 1 (0.1%)     | 72 (25.3%)        | 8 (34.8%)   | 64 (24.4%)  | 7 (3.6%)            | 0 (0.0%)     | 7 (4.0%)    |
| 60-<90                                  | 21 (2.1%)          | 2 (7.4%)     | 19 (2.0%)    | 94 (33.0%)        | 5 (21.7%)   | 89 (34.0%)  | 87 (44.2%)          | 8 (38.1%)    | 79 (44.9%)  |
| ≥90                                     | 962 (97.7%)        | 25 (92.6%)   | 937 (97.8%)  | 83 (29.1%)        | 6 (26.1%)   | 77 (29.4%)  | 103 (52.3%)         | 13 (61.9%)   | 90 (51.1%)  |
| Creatinine, mg/dL                       | 0.76 (0.13)        | 0.82 (0.16)  | 0.76 (0.13)  | 1.38 (0.64)       | 1.42 (0.78) | 1.37 (0.63) | 0.93 (0.21)         | 0.92 (0.18)  | 0.93 (0.21) |
| Cystatin C, mg/L                        | 0.74 (0.10)        | 0.75 (0.13)  | 0.74 (0.10)  | 1.33 (0.61)       | 1.42 (0.73) | 1.32 (0.60) | 0.94 (0.17)         | 0.87 (0.13)  | 0.95 (0.17) |

|                                         | Mayo CKD <sup>40</sup> |          |             | Mayo Donor <sup>40</sup> | CCFP CKD <sup>39</sup> |             |             |
|-----------------------------------------|------------------------|----------|-------------|--------------------------|------------------------|-------------|-------------|
|                                         | Overall                | Black    | Non-Black   | Nonblack (Overall)       | Overall                | Black       | Non-Black   |
| N                                       | 203                    | 1 (0.5%) | 202 (99.5%) | 50 (100%)                | 88                     | 7 (8.0%)    | 81 (92.0%)  |
| Age, years                              | 55.2 (16.0)            | NS       | 55.2 (16.0) | 41.3 (10.5)              | 53.7 (13.3)            | 55.4 (12.9) | 53.6 (13.4) |
| <40                                     | 39 (19.2%)             |          | 39 (19.3%)  | 19 (38.0%)               | 12 (13.6%)             | NS          | 11 (13.6%)  |
| 40-65                                   | 103 (50.7%)            |          | 102 (50.5%) | 30 (60.0%)               | 58 (65.9%)             |             | 53 (65.4%)  |
| >65                                     | 61 (30.1%)             |          | 61 (30.2%)  | 1 (2.0%)                 | 18 (20.5%)             |             | 17 (21.0%)  |
| Female                                  | 91 (44.8%)             | NS       | 91 (45.1%)  | 34 (68.0%)               | 33 (37.5%)             |             | 29 (35.8%)  |
| BMI, kg/m <sup>2</sup>                  | 29.5 (6.9)             | NS       | 29.5 (6.9)  | 28.4 (5.7)               | 28.4 (6.3)             | 28.2 (4.8)  | 28.4 (6.5)  |
| <20                                     | 7 (3.5%)               |          | 7 (3.5%)    | 1 (2.0%)                 | 4 (4.6%)               | NS          | 4 (4.9%)    |
| 20-<25                                  | 44 (21.7%)             |          | 44 (21.8%)  | 14 (28.0%)               | 23 (26.1%)             |             | 21 (25.9%)  |
| 25-<30                                  | 73 (36.0%)             |          | 73 (36.1%)  | 20 (40.0%)               | 32 (36.4%)             |             | 28 (34.6%)  |
| ≥30                                     | 79 (38.9%)             |          | 78 (38.6%)  | 15 (30.0%)               | 29 (33.0%)             |             | 28 (34.6%)  |
| Diabetes                                | 37 (18.2%)             | NS       | 37 (18.3%)  | 0 (0.0%)                 | 18 (20.5%)             | NS          | 18 (22.2%)  |
| Kidney donor candidates                 | 0 (0.0%)               | NS       | 0 (0.0%)    | 50 (100%)                | 0 (0.0%)               | NS          | 0 (0.0%)    |
| Measured GFR, ml/min/1.73m <sup>2</sup> | 51.0 (29.2)            | NS       | 50.9 (29.3) | 100.5 (16.2)             | 53.1 (31.1)            | 52.9 (33.5) | 53.1 (31.1) |
| <30                                     | 63 (31.0%)             |          | 63 (31.2%)  | 0 (0.0%)                 | 20 (22.7%)             | NS          | 18 (22.2%)  |
| 30-<60                                  | 59 (29.1%)             |          | 59 (29.2%)  | 0 (0.0%)                 | 33 (37.5%)             |             | 31 (38.3%)  |
| 60-<90                                  | 56 (27.6%)             |          | 55 (27.2%)  | 12 (24.0%)               | 27 (30.7%)             |             | 25 (30.9%)  |
| ≥90                                     | 25 (12.3%)             |          | 25 (12.4%)  | 38 (76.0%)               | 8 (9.1%)               |             | 7 (8.6%)    |
| Creatinine, mg/dL                       | 1.62 (1.17)            | NS       | 1.62 (1.17) | 0.68 (0.16)              | 1.68 (1.15)            | 1.52 (1.12) | 1.69 (1.15) |
| Cystatin C, mg/L                        | 1.76 (0.81)            | NS       | 1.76 (0.81) | 0.93 (0.15)              | 1.69 (0.93)            | 1.49 (0.73) | 1.70 (0.94) |

|                                         | CCFP Donor <sup>39</sup> |              |              | Groningen <sup>42</sup> |          |             | Groningen Donors <sup>56</sup> | RASS <sup>43</sup> |          |              |
|-----------------------------------------|--------------------------|--------------|--------------|-------------------------|----------|-------------|--------------------------------|--------------------|----------|--------------|
|                                         | Overall                  | Black        | Non-Black    | Overall                 | Black    | Non-Black   | Nonblack (overall)             | Overall            | Black    | Non-Black    |
| N                                       | 96                       | 10 (10.4%)   | 86 (89.6%)   | 29                      | 1 (3.4%) | 28 (96.6%)  | 34 (100%)                      | 39                 | 1 (2.6%) | 38 (97.4%)   |
| Age, years                              | 42.9 (11.9)              | 36.2 (10.2)  | 43.7 (11.8)  | 40.9 (14.4)             | NS       | 40.9 (14.7) | 51.9 (12.7)                    | 24.2 (5.0)         | NS       | 23.9 (4.8)   |
| <40                                     | 38 (39.6%)               | NS           | 31 (36.1%)   | 17 (58.6%)              |          | 17 (60.7%)  | 6 (17.7%)                      | 39 (100%)          |          | 38 (100%)    |
| 40-65                                   | 57 (59.4%)               |              | 54 (62.8%)   | 12 (41.4%)              |          | 11 (39.3%)  | 22 (64.7%)                     | 0 (0.0%)           |          | 0 (0.0%)     |
| >65                                     | 1 (1.0%)                 |              | 1 (1.2%)     | 0 (0.0%)                |          | 0 (0.0%)    | 6 (17.7%)                      | 0 (0.0%)           |          | 0 (0.0%)     |
| Female                                  | 48 (50.0%)               | NS           | 44 (51.2%)   | 17 (58.6%)              | NS       | 16 (57.1%)  | 13 (38.2%)                     | 15 (38.5%)         | NS       | 15 (39.5%)   |
| BMI, kg/m <sup>2</sup>                  | 26.4 (4.2)               | 26.5 (3.5)   | 26.4 (4.3)   | 24.4 (3.3)              | NS       | 24.5 (3.3)  | 26.3 (4.2)                     | 25.5 (3.6)         | NS       | 25.5 (3.6)   |
| <20                                     | 6 (6.3%)                 | NS           | 6 (7.0%)     | 2 (6.9%)                |          | 2 (7.1%)    | 1 (2.9%)                       | 0 (0.0%)           |          | 0 (0.0%)     |
| 20-<25                                  | 34 (35.4%)               |              | 29 (33.7%)   | 16 (55.2%)              |          | 15 (53.6%)  | 12 (35.3%)                     | 19 (48.7%)         |          | 19 (50.0%)   |
| 25-<30                                  | 36 (37.5%)               |              | 34 (39.5%)   | 10 (34.5%)              |          | 10 (35.7%)  | 13 (38.2%)                     | 16 (41.0%)         |          | 15 (39.5%)   |
| ≥30                                     | 20 (20.8%)               |              | 17 (19.8%)   | 1 (3.5%)                |          | 1 (3.6%)    | 8 (23.5%)                      | 4 (10.3%)          | NS       | 4 (10.5%)    |
| Diabetes                                | 3 (3.1%)                 | NS           | 3 (3.5%)     | 5 (17.2%)               | NS       | 5 (17.9%)   | 0 (0.0%)                       | 39 (100%)          | NS       | 38 (100%)    |
| Kidney donor candidates                 | 96 (100%)                | NS           | 86 (100%)    | 0 (0.0%)                | NS       | 0 (0.0%)    | 34 (100%)                      | 0 (0.0%)           | NS       | 0 (0.0%)     |
| Measured GFR, ml/min/1.73m <sup>2</sup> | 102.1 (18.3)             | 102.8 (11.6) | 102.0 (19.0) | 81.6 (33.1)             | NS       | 81.9 (33.6) | 102.8 (19.3)                   | 143.0 (18.6)       | NS       | 142.4 (18.5) |
| <30                                     | 0 (0.0%)                 | NS           | 0 (0.0%)     | 3 (10.3%)               |          | 3 (10.7%)   | 0 (0.0%)                       | 0 (0.0%)           |          | 0 (0.0%)     |
| 30-<60                                  | 1 (1.0%)                 |              | 1 (1.2%)     | 4 (13.8%)               |          | 4 (14.3%)   | 0 (0.0%)                       | 0 (0.0%)           |          | 0 (0.0%)     |
| 60-<90                                  | 22 (22.9%)               |              | 21 (24.4%)   | 9 (31.0%)               |          | 8 (28.6%)   | 11 (32.4%)                     | 0 (0.0%)           |          | 0 (0.0%)     |
| ≥90                                     | 73 (76.0%)               |              | 64 (74.4%)   | 13 (44.8%)              |          | 13 (46.4%)  | 23 (67.7%)                     | 39 (100%)          |          | 38 (100%)    |
| Creatinine, mg/dL                       | 0.82 (0.16)              | 0.93 (0.14)  | 0.81 (0.15)  | 1.12 (0.78)             | NS       | 1.14 (0.80) | 0.89 (0.15)                    | 0.77 (0.14)        | NS       | 0.77 (0.14)  |
| Cystatin C, mg/L                        | 0.84 (0.11)              | 0.81 (0.10)  | 0.85 (0.11)  | 1.42 (0.70)             | NS       | 1.41 (0.71) | 0.98 (0.14)                    | 0.76 (0.07)        | NS       | 0.76 (0.07)  |

Abbreviations: MDRD Study, Modification of Diet in Renal Disease Study; AASK, African American Study of Kidney Diseases and Hypertension; DCCT, Diabetes Control and Complications Trial; CSG, Collaborative Study Group: Captopril in Diabetic Nephropathy Study; CRIC, Chronic Renal Insufficiency Cohort Study; CCF, Cleveland Clinic Foundation; GFR, glomerular filtration rate; BMI, body mass index; SD, standard deviation, NS, number too small for the group or subgroup to present descriptive data. To convert GFR from mL/min/1.73 m<sup>2</sup> to mL/s/m<sup>2</sup>, multiply by 0.0167. To convert serum creatinine from mg/dL to μmol/L, multiply by 88.4.

**Table S8:** Characteristics of the 2021 validation dataset by study

|                                         | AGES <sup>44</sup> | RASS <sup>43</sup> |          |              | UMN Donor   |             |             |
|-----------------------------------------|--------------------|--------------------|----------|--------------|-------------|-------------|-------------|
|                                         | Nonblack (Overall) | Overall            | Black    | Non-Black    | Overall     | Black       | Non-Black   |
| N                                       | 805 (100%)         | 211                | 5 (2.4%) | 206 (97.6%)  | 288         | 10 (3.5%)   | 278 (96.5%) |
| Age, years                              | 80.0 (4.0)         | 32.6 (9.0)         | NS       | 32.5 (9.0)   | 40.4 (12.5) | 37.3 (14.2) | 40.5 (12.4) |
| <40                                     | 0 (0.0%)           | 161 (76.3%)        |          | 157 (76.2%)  | 144 (50.0%) | NS          | 138 (49.6%) |
| 40-65                                   | 0 (0.0%)           | 50 (23.7%)         |          | 49 (23.8%)   | 139 (48.3%) |             | 135 (48.6%) |
| >65                                     | 805 (100%)         | 0 (0.0%)           |          | 0 (0.0%)     | 5 (1.7%)    |             | 5 (1.8%)    |
| Female                                  | 450 (55.9%)        | 109 (51.7%)        | NS       | 106 (51.5%)  | 186 (64.6%) | 6 (60.0%)   | 180 (64.8%) |
| BMI, kg/m <sup>2</sup>                  | 27.3 (4.2)         | 25.8 (3.7)         | NS       | 25.8 (3.7)   | 26.6 (3.8)  | 23.9 (3.5)  | 26.7 (3.8)  |
| <20                                     | 19 (2.4%)          | 0 (0.0%)           |          | 0 (0.0%)     | 9 (3.1%)    | NS          | 8 (2.9%)    |
| 20-<25                                  | 221 (27.5%)        | 98 (46.5%)         |          | 96 (46.6%)   | 90 (31.3%)  |             | 85 (30.6%)  |
| 25-<30                                  | 385 (47.8%)        | 84 (39.8%)         |          | 81 (39.3%)   | 135 (46.9%) |             | 131 (47.1%) |
| ≥30                                     | 180 (22.4%)        | 29 (13.7%)         |          | 29 (14.1%)   | 54 (18.8%)  |             | 54 (19.4%)  |
| Diabetes                                | 83 (10.4%)         | 211 (100%)         | NS       | 206 (100%)   | 0 (0.0%)    | NS          | 0 (0.0%)    |
| Kidney donor candidates                 | 0 (0.0%)           | 0 (0.0%)           | NS       | 0 (0.0%)     | 288 (100%)  | NS          | 278 (100%)  |
| Measured GFR, ml/min/1.73m <sup>2</sup> | 62.4 (16.5)        | 128.1 (18.9)       | NS       | 128.2 (19.1) | 93.8 (13.8) | 96.1 (19.4) | 93.7 (13.6) |
| <30                                     | 28 (3.5%)          | 0 (0.0%)           |          | 0 (0.0%)     | 0 (0.0%)    | NS          | 0 (0.0%)    |
| 30-<60                                  | 286 (35.5%)        | 0 (0.0%)           |          | 0 (0.0%)     | 3 (1.0%)    |             | 3 (1.1%)    |
| 60-<90                                  | 458 (56.9%)        | 0 (0.0%)           |          | 0 (0.0%)     | 114 (39.6%) |             | 110 (39.6%) |
| ≥90                                     | 33 (4.1%)          | 211 (100%)         |          | 206 (100%)   | 171 (59.4%) |             | 165 (59.4%) |
| Creatinine, mg/dL                       | 1.00 (0.37)        | 0.77 (0.14)        | NS       | 0.77 (0.14)  | 0.79 (0.15) | 0.72 (0.15) | 0.80 (0.15) |
| Cystatin C, mg/L                        | 1.19 (0.38)        | 0.77 (0.10)        | NS       | 0.77 (0.10)  | 0.78 (0.11) | 0.74 (0.14) | 0.78 (0.11) |



|                                         | HIV <sup>50</sup> |             |             | MACS <sup>51</sup> |             |             | STENO <sup>45-48</sup> |
|-----------------------------------------|-------------------|-------------|-------------|--------------------|-------------|-------------|------------------------|
|                                         | Overall           | Black       | Non-Black   | Overall            | Black       | Non-Black   | Overall (Non-Black)    |
| N                                       | 200               | 104 (52.0%) | 96 (48.0%)  | 691                | 235 (34.0%) | 456 (66.0%) | 245 (100%)             |
| Age, years                              | 47.8 (8.2)        | 47.3 (8.8)  | 48.3 (7.6)  | 52.5 (8.7)         | 50.0 (7.0)  | 53.8 (9.1)  | 42.5 (9.1)             |
| <40                                     | 26 (13.0%)        | 16 (15.4%)  | 10 (10.4%)  | 41 (5.9%)          | 11 (4.7%)   | 30 (6.6%)   | 110 (44.9%)            |
| 40-65                                   | 169 (84.5%)       | 86 (82.7%)  | 83 (86.5%)  | 600 (86.8%)        | 218 (92.8%) | 382 (83.8%) | 134 (54.7%)            |
| >65                                     | 5 (2.5%)          | 2 (1.9%)    | 3 (3.1%)    | 50 (7.2%)          | 6 (2.6%)    | 44 (9.7%)   | 1 (0.4%)               |
| Female                                  | 55 (27.5%)        | 36 (34.6%)  | 19 (19.8%)  | 0 (0.0%)           | 0 (0.0%)    | 0 (0.0%)    | 85 (34.7%)             |
| BMI, kg/m <sup>2</sup>                  | 26.6 (5.9)        | 27.1 (6.0)  | 26.2 (5.8)  | 26.4 (4.7)         | 27.1 (5.6)  | 26.0 (4.1)  | 24.0 (3.3)             |
| <20                                     | 15 (7.5%)         | 8 (7.7%)    | 7 (7.3%)    | 26 (3.8%)          | 8 (3.4%)    | 18 (4.0%)   | 20 (8.2%)              |
| 20-<25                                  | 65 (32.5%)        | 30 (28.9%)  | 35 (36.5%)  | 272 (39.4%)        | 94 (40.0%)  | 178 (39.0%) | 147 (60.0%)            |
| 25-<30                                  | 84 (42.0%)        | 45 (43.3%)  | 39 (40.6%)  | 278 (40.2%)        | 81 (34.5%)  | 197 (43.2%) | 66 (26.9%)             |
| ≥30                                     | 36 (18.0%)        | 21 (20.2%)  | 15 (15.6%)  | 115 (16.6%)        | 52 (22.1%)  | 63 (13.8%)  | 12 (4.9%)              |
| Diabetes                                | 16 (8.0%)         | 9 (8.7%)    | 7 (7.3%)    | 102 (18.6%)        | 48 (26.8%)  | 54 (14.6%)  | 245 (100%)             |
| Kidney donor candidates                 | 0 (0.0%)          | 0 (0.0%)    | 0 (0.0%)    | 0 (0.0%)           | 0 (0.0%)    | 0 (0.0%)    | 0 (0.0%)               |
| Measured GFR, ml/min/1.73m <sup>2</sup> | 87.0 (25.7)       | 87.2 (27.6) | 86.8 (23.6) | 95.9 (21.1)        | 95.4 (21.7) | 96.2 (20.8) | 71.8 (31.0)            |
| <30                                     | 3 (1.5%)          | 2 (1.9%)    | 1 (1.0%)    | 0 (0.0%)           | 0 (0.0%)    | 0 (0.0%)    | 19 (7.8%)              |
| 30-<60                                  | 25 (12.5%)        | 15 (14.4%)  | 10 (10.4%)  | 37 (5.4%)          | 14 (6.0%)   | 23 (5.0%)   | 69 (28.2%)             |
| 60-<90                                  | 87 (43.5%)        | 43 (41.4%)  | 44 (45.8%)  | 231 (33.4%)        | 72 (30.6%)  | 159 (34.9%) | 87 (35.5%)             |
| ≥90                                     | 85 (42.5%)        | 44 (42.3%)  | 41 (42.7%)  | 423 (61.2%)        | 149 (63.4%) | 274 (60.1%) | 70 (28.6%)             |
| Creatinine, mg/dL                       | 1.17 (0.41)       | 1.23 (0.45) | 1.12 (0.36) | 1.00 (0.26)        | 1.08 (0.29) | 0.95 (0.23) | 1.37 (0.80)            |
| Cystatin C, mg/L                        | 1.06 (0.39)       | 1.04 (0.42) | 1.08 (0.36) | 0.99 (0.28)        | 1.01 (0.31) | 0.99 (0.26) | 1.41 (0.66)            |

|                                         | Lund CKD <sup>49</sup> | Lund Donor <sup>49</sup> | PERL <sup>52</sup> |             |             |
|-----------------------------------------|------------------------|--------------------------|--------------------|-------------|-------------|
|                                         | Non-Black (Overall)    | Non-Black (Overall)      | Overall            | Black       | Non-Black   |
| N                                       | 343 (100%)             | 7 (100%)                 | 489                | 57 (11.7%)  | 432 (88.3%) |
| Age, years                              | 57.8 (15.6)            | 49 (10.3)                | 51.4 (11.0)        | 46.0 (10.2) | 52.1 (10.9) |
| <40                                     | 46 (13.4%)             | NS                       | 86 (17.6%)         | 18 (31.6%)  | 68 (15.7%)  |
| 40-65                                   | 182 (53.1%)            |                          | 360 (73.6%)        | 38 (66.7%)  | 322 (74.5%) |
| >65                                     | 115 (33.5%)            |                          | 43 (8.8%)          | 1 (1.8%)    | 42 (9.7%)   |
| Female                                  | 167 (48.7%)            | 5 (71.4%)                | 163 (33.3%)        | 20 (35.1%)  | 143 (33.1%) |
| BMI, kg/m <sup>2</sup>                  | 25.6(5.5)              | 26 (2)                   | 29.4 (5.9)         | 30.1 (6.8)  | 29.3 (5.8)  |
| <20                                     | 39 (11.4%)             | NS                       | 11 (2.3%)          | 3 (5.4%)    | 8 (1.9%)    |
| 20-<25                                  | 139 (40.5%)            |                          | 106 (21.9%)        | 11 (19.6%)  | 95 (22.2%)  |
| 25-<30                                  | 112 (32.7%)            |                          | 166 (34.3%)        | 17 (30.4%)  | 149 (34.8%) |
| ≥30                                     | 53 (15.5%)             |                          | 201 (41.5%)        | 25 (44.6%)  | 176 (41.1%) |
| Diabetes                                | 66 (19.2%)             |                          | 489 (100%)         | 57 (100%)   | 432 (100%)  |
| Kidney donor candidates                 | 0                      | NS                       | 0 (0.0%)           | 0 (0.0%)    | 0 (0.0%)    |
| Measured GFR, ml/min/1.73m <sup>2</sup> | 63.6 (32.6)            | 88.4 (18.2)              | 68.0 (17.0)        | 66.7 (15.3) | 68.2 (17.2) |
| <30                                     | 68 (19.8%)             | NS                       | 4 (0.8%)           | 1 (1.8%)    | 3 (0.7%)    |
| 30-<60                                  | 96 (28%)               |                          | 163 (33.3%)        | 17 (29.8%)  | 146 (33.8%) |
| 60-<90                                  | 96 (28%)               |                          | 277 (56.7%)        | 36 (63.2%)  | 241 (55.8%) |
| ≥90                                     | 83 (24.2%)             |                          | 45 (9.2%)          | 3 (5.3%)    | 42 (9.7%)   |
| Creatinine, mg/dL                       | 1.50 (1.1)             | 0.99 (0.24)              | 1.12 (0.30)        | 1.26 (0.36) | 1.10 (0.29) |
| Cystatin C, mg/L                        | 1.58 (0.8)             | 1.02 (0.25)              | 1.15 (0.33)        | 1.13 (0.35) | 1.15 (0.32) |

|                                         | MESA <sup>53</sup> |             |             | ALTOLD <sup>54</sup> |          |             | NephroTest <sup>55</sup> |             |             |
|-----------------------------------------|--------------------|-------------|-------------|----------------------|----------|-------------|--------------------------|-------------|-------------|
|                                         | Overall            | Black       | Non-Black   | Overall              | Black    | Non-Black   | Overall                  | Black       | Non-Black   |
| N                                       | 294                | 139 (47.3%) | 155 (52.7%) | 164                  | 4 (2.4%) | 160 (97.6%) | 313                      | 25 (8.0%)   | 288 (92.0%) |
| Age, years                              | 70.7 (8.6)         | 69.5 (8.6)  | 71.8 (8.5)  | 44.1 (11.4)          | NS       | 44.2 (11.3) | 58.6 (14.7)              | 55.6 (10.8) | 58.8 (15.0) |
| <40                                     | 0 (0.0%)           | 0 (0.0%)    | 0 (0.0%)    | 61 (37.2%)           |          | 59 (36.9%)  | 38 (12.1%)               | 2 (8.0%)    | 36 (12.5%)  |
| 40-65                                   | 92 (31.3%)         | 52 (37.4%)  | 40 (25.8%)  | 99 (60.4%)           |          | 98 (61.3%)  | 159 (50.8%)              | 17 (68.0%)  | 142 (49.3%) |
| >65                                     | 202 (68.7%)        | 87 (62.6%)  | 115 (74.2%) | 4 (2.4%)             |          | 3 (1.9%)    | 116 (37.1%)              | 6 (24.0%)   | 110 (38.2%) |
| Female                                  | 140 (47.6%)        | 70 (50.4%)  | 70 (45.2%)  | 107 (65.2%)          |          | 105 (65.6%) | 90 (28.8%)               | 3 (12.0%)   | 87 (30.2%)  |
| BMI, kg/m <sup>2</sup>                  | 29.7 (5.4)         | 30.6 (5.8)  | 28.9 (4.9)  | 26.7 (4.2)           | NS       | 26.8 (4.2)  | 25.9 (4.4)               | 24.6 (3.6)  | 26.1 (4.5)  |
| <20                                     | 3 (1.0%)           | 1 (0.7%)    | 2 (1.3%)    | 1 (0.6%)             | NS       | 1 (0.6%)    | 22 (7.0%)                | 2 (8.0%)    | 20 (6.9%)   |
| 20-<25                                  | 47 (16.0%)         | 16 (11.5%)  | 31 (20.0%)  | 62 (38.0%)           |          | 60 (37.7%)  | 117 (37.4%)              | 13 (52.0%)  | 104 (36.1%) |
| 25-<30                                  | 124 (42.2%)        | 55 (39.6%)  | 69 (44.5%)  | 65 (39.9%)           |          | 63 (39.6%)  | 119 (38.0%)              | 8 (32.0%)   | 111 (38.5%) |
| ≥30                                     | 120 (40.8%)        | 67 (48.2%)  | 53 (34.2%)  | 35 (21.5%)           |          | 35 (22.0%)  | 55 (17.6%)               | 2 (8.0%)    | 53 (18.4%)  |
| Diabetes                                | 73 (24.8%)         | 47 (33.8%)  | 26 (16.8%)  | 0 (0.0%)             |          | 0 (0.0%)    | 72 (23.0%)               | 5 (20.0%)   | 67 (23.3%)  |
| Kidney donor candidates                 | 0 (0.0%)           | 0 (0.0%)    | 0 (0.0%)    | 164 (100%)           | NS       | 160 (100%)  | 0 (0.0%)                 | 0 (0.0%)    | 0 (0.0%)    |
| Measured GFR, ml/min/1.73m <sup>2</sup> | 72.6 (18.8)        | 74.2 (19.7) | 71.2 (17.9) | 96.1 (14.3)          | NS       | 95.7 (14.3) | 35.4 (17.7)              | 41.2 (21.9) | 34.8 (17.3) |
| <30                                     | 2 (0.7%)           | 2 (1.4%)    | 0 (0.0%)    | 0 (0.0%)             |          | 0 (0.0%)    | 130 (41.5%)              | 9 (36.0%)   | 121 (42.0%) |
| 30-<60                                  | 66 (22.5%)         | 26 (18.7%)  | 40 (25.8%)  | 0 (0.0%)             |          | 0 (0.0%)    | 151 (48.2%)              | 12 (48.0%)  | 139 (48.3%) |
| 60-<90                                  | 172 (58.5%)        | 82 (59.0%)  | 90 (58.1%)  | 47 (28.7%)           |          | 47 (29.4%)  | 28 (9.0%)                | 3 (12.0%)   | 25 (8.7%)   |
| ≥90                                     | 54 (18.4%)         | 29 (20.9%)  | 25 (16.1%)  | 117 (71.3%)          |          | 113 (70.6%) | 4 (1.3%)                 | 1 (4.0%)    | 3 (1.0%)    |
| Creatinine, mg/dL                       | 0.94 (0.34)        | 0.99 (0.43) | 0.89 (0.23) | 0.79 (0.15)          | NS       | 0.79 (0.15) | 2.44 (1.18)              | 2.61 (1.39) | 2.43 (1.16) |
| Cystatin C, mg/L                        | 1.03 (0.33)        | 1.01 (0.35) | 1.06 (0.30) | 0.80 (0.12)          | NS       | 0.80 (0.12) | 2.01 (0.75)              | 1.78 (0.75) | 2.02 (0.74) |

Abbreviations: MACS, Multicenter Aids Cohort Study; PERL, Preventing Early Rental Loss in Diabetes; CCF, Cleveland Clinic Foundation; MESA, Multi-Ethnic Study of Atherosclerosis; ALTOLD, Assessing Long Term Outcome of Living Kidney Donors; CRIC, Chronic Renal Insufficiency Cohort Study; AGES, Age, Gene/Environment Susceptibility-Reykjavik Study; UMN, University of Minnesota; GFR, glomerular filtration rate; BMI, body mass index; SD, standard deviation, NS, number too small for the group or subgroup to present descriptive data. To convert GFR from mL/min/1.73 m<sup>2</sup> to mL/s/m<sup>2</sup>, multiply by 0.0167. To convert serum creatinine from mg/dL to μmol/L, multiply by 88.4.

\*No Donors was assumed

**Table S9:** Characteristics of the 2009 validation dataset by study

|                                         | Baylor <sup>57</sup> |             |             | STENO <sup>45-48</sup> | RASS <sup>43</sup> |          |              |
|-----------------------------------------|----------------------|-------------|-------------|------------------------|--------------------|----------|--------------|
|                                         | Overall              | Black       | Non-Black   | Nonblack (Overall)     | Overall            | Black    | Non-Black    |
| N                                       | 708                  | 47 (6.6%)   | 661 (93.4%) | 245 (100%)             | 235                | 5 (2.1%) | 230 (97.9%)  |
| Age, years                              | 53.7 (11.0)          | 48.6 (12.7) | 54.0 (10.8) | 42.5 (9.1)             | 31.7 (9.0)         | NS       | 31.6 (9.1)   |
| <40                                     | 68 (9.6%)            | 12 (25.5%)  | 56 (8.5%)   | 110 (44.9%)            | 185 (78.7%)        |          | 181 (78.7%)  |
| 40-65                                   | 535 (75.6%)          | 31 (66.0%)  | 504 (76.3%) | 134 (54.7%)            | 50 (21.3%)         |          | 49 (21.3%)   |
| >65                                     | 105 (14.8%)          | 4 (8.5%)    | 101 (15.3%) | 1 (0.4%)               |                    |          |              |
| Female                                  | 321 (45.3%)          | 27 (57.5%)  | 294 (44.5%) | 85 (34.7%)             | 121 (51.5%)        | NS       | 118 (51.3%)  |
| BMI, kg/m <sup>2</sup>                  | 28.6 (6.5)           | 28.5 (6.4)  | 28.6 (6.5)  | 24.0 (3.3)             | 25.8 (3.7)         | NS       | 25.8 (3.7)   |
| <20                                     | 35 (5.1%)            | 4 (9.1%)    | 31 (4.8%)   | 20 (8.2%)              |                    |          |              |
| 20-<25                                  | 174 (25.3%)          | 11 (25.0%)  | 163 (25.4%) | 147 (60.0%)            | 109 (46.4%)        |          | 107 (46.5%)  |
| 25-<30                                  | 227 (33.0%)          | 13 (29.6%)  | 214 (33.3%) | 66 (26.9%)             | 94 (40.0%)         |          | 91 (39.6%)   |
| ≥30                                     | 251 (36.5%)          | 16 (36.4%)  | 235 (36.6%) | 12 (4.9%)              | 32 (13.6%)         |          | 32 (13.9%)   |
| Diabetes                                | 177 (25.0%)          | 16 (34.0%)  | 161 (24.4%) | 245 (100%)             | 235 (100%)         |          | 230 (100%)   |
| Transplant recipient                    | 708 (100%)           | 47 (100%)   | 661 (100%)  | 0 (0%)                 | 0 (0.0%)           | NS       | 0 (0.0%)     |
| Kidney donor candidates                 | 0 (0.0%)             | 0 (0.0%)    | 0 (0.0%)    | 0 (0.0%)               | 0 (0.0%)           | NS       | 0 (0.0%)     |
| Measured GFR, ml/min/1.73m <sup>2</sup> | 59.2 (27.6)          | 64.7 (28.4) | 58.9 (27.5) | 71.8 (31.0)            | 129.5 (19.4)       | NS       | 129.6 (19.5) |
| <30                                     | 81 (11.4%)           | 3 (6.4%)    | 78 (11.8%)  | 19 (7.8%)              | 0 (0.0%)           |          | 0 (0.0%)     |
| 30-<60                                  | 323 (45.6%)          | 21 (44.7%)  | 302 (45.7%) | 69 (28.2%)             | 0 (0.0%)           |          | 0 (0.0%)     |
| 60-<90                                  | 202 (28.5%)          | 15 (31.9%)  | 187 (28.3%) | 87 (35.5%)             | 0 (0.0%)           |          | 0 (0.0%)     |
| ≥90                                     | 102 (14.4%)          | 8 (17.0%)   | 94 (14.2%)  | 70 (28.6%)             | 235 (100%)         |          | 230 (100%)   |
| Creatinine, mg/dL                       | 1.43 (0.62)          | 1.30 (0.46) | 1.44 (0.63) | 1.48 (0.76)            | 0.82 (0.14)        | NS       | 0.82 (0.14)  |

|                                         | Groningen <sup>42</sup> |          |             | Groningen Donors <sup>56</sup> | Interdiabetes <sup>58</sup> |          |              |
|-----------------------------------------|-------------------------|----------|-------------|--------------------------------|-----------------------------|----------|--------------|
|                                         | Overall                 | Black    | Non-Black   | Nonblack (Overall)             | Overall                     | Black    | Non-Black    |
| N                                       | 422                     | 4 (0.9%) | 418 (99.1%) | 43 (100.0%)                    | 16                          | 1 (6.3%) | 15 (93.8%)   |
| Age, years                              | 48.4 (13.1)             | NS       | 48.5 (13.1) | 51.0 (12.0)                    | 23.9 (5.7)                  | NS       | 23.3 (5.2)   |
| <40                                     | 113 (26.8%)             |          | 110 (26.3%) | 8 (18.6%)                      | 16 (100%)                   |          | 15 (100%)    |
| 40-65                                   | 278 (65.9%)             |          | 277 (66.3%) | 29 (67.4%)                     | 0 (0.0%)                    |          | 0 (0.0%)     |
| >65                                     | 31 (7.4%)               |          | 31 (7.4%)   | 6 (14.0%)                      | 0 (0.0%)                    |          | 0 (0.0%)     |
| Female                                  | 189 (44.8%)             | NS       | 187 (44.7%) | 19 (44.2%)                     | 3 (18.8%)                   | NS       | 3 (20.0%)    |
| BMI, kg/m <sup>2</sup>                  | 25.8 (4.4)              | NS       | 25.9 (4.4)  | 26.8 (4.2)                     | 25.2 (2.7)                  | NS       | 25.0 (2.6)   |
| <20                                     | 33 (7.8%)               |          | 33 (7.9%)   | 1 (2.3%)                       | 0 (0.0%)                    |          | 0 (0.0%)     |
| 20-<25                                  | 155 (36.7%)             |          | 153 (36.6%) | 14 (32.6%)                     | 9 (56.3%)                   |          | 9 (60.0%)    |
| 25-<30                                  | 164 (38.9%)             |          | 162 (38.8%) | 17 (39.5%)                     | 6 (37.5%)                   |          | 5 (33.3%)    |
| ≥30                                     | 70 (16.6%)              |          | 70 (16.8%)  | 11 (25.6%)                     | 1 (6.3%)                    |          | 1 (6.7%)     |
| Diabetes                                | 56 (13.3%)              | NS       | 56 (13.4%)  | 0 (0.0%)                       | 16 (100%)                   |          | 15 (100%)    |
| Transplant recipient                    | 365 (86.5%)             | NS       | 362 (86.6%) | 2 (4.7%)                       | 0 (0.0%)                    | NS       | 0 (0.0%)     |
| Kidney donor candidates                 | 0 (0.0%)                | NS       | 0 (0.0%)    | 43 (100%)                      | 0 (0.0%)                    | NS       | 0 (0.0%)     |
| Measured GFR, ml/min/1.73m <sup>2</sup> | 55.9 (23.5)             | NS       | 56.0 (23.6) | 102.2 (19.3)                   | 149.4 (21.6)                | NS       | 148.3 (21.8) |
| <30                                     | 50 (11.9%)              |          | 49 (11.7%)  | 0 (0.0%)                       | 0 (0.0%)                    |          | 0 (0.0%)     |
| 30-<60                                  | 209 (49.5%)             |          | 208 (49.8%) | 0 (0.0%)                       | 0 (0.0%)                    |          | 0 (0.0%)     |
| 60-<90                                  | 126 (29.9%)             |          | 124 (29.7%) | 14 (32.6%)                     | 0 (0.0%)                    |          | 0 (0.0%)     |
| ≥90                                     | 37 (8.8%)               |          | 37 (8.9%)   | 29 (67.4%)                     | 16 (100%)                   |          | 15 (100%)    |
| Creatinine, mg/dL                       | 1.44 (0.57)             | NS       | 1.44 (0.56) | 0.85 (0.16)                    | 0.80 (0.11)                 | NS       | 0.80 (0.11)  |

|                                         | CCFP CKD <sup>39</sup> |             |             | CCFP Donor <sup>39</sup> |              |              | CRIC <sup>38</sup> |             |             |
|-----------------------------------------|------------------------|-------------|-------------|--------------------------|--------------|--------------|--------------------|-------------|-------------|
|                                         | Overall                | Black       | Non-Black   | Overall                  | Black        | Non-Black    | Overall            | Black       | Non-Black   |
| N                                       | 103                    | 9 (8.7%)    | 94 (91.3%)  | 96                       | 10 (10.4%)   | 86 (89.6%)   | 298                | 127 (42.6%) | 171 (57.4%) |
| Age, years                              | 51.9 (14.3)            | 49.7 (16.8) | 52.1 (14.2) | 42.9 (11.9)              | 36.2 (10.2)  | 43.7 (11.8)  | 56.8 (11.1)        | 57.2 (10.6) | 56.5 (11.5) |
| <40                                     | 17 (16.5%)             | NS          | 15 (16.0%)  | 38 (39.6%)               | NS           | 31 (36.1%)   | 33 (11.1%)         | 14 (11.0%)  | 19 (11.1%)  |
| 40-65                                   | 68 (66.0%)             |             | 62 (66.0%)  | 57 (59.4%)               |              | 54 (62.8%)   | 203 (68.1%)        | 87 (68.5%)  | 116 (67.8%) |
| >65                                     | 18 (17.5%)             |             | 17 (18.1%)  | 1 (1.0%)                 |              | 1 (1.2%)     | 62 (20.8%)         | 26 (20.5%)  | 36 (21.1%)  |
| Female                                  | 37 (35.9%)             |             | 32 (34.0%)  | 48 (50.0%)               |              | 44 (51.2%)   | 112 (37.6%)        | 52 (40.9%)  | 60 (35.1%)  |
| BMI, kg/m <sup>2</sup>                  | 28.1 (6.2)             | 28.4 (5.1)  | 28.0 (6.4)  | 26.4 (4.2)               | 26.5 (3.5)   | 26.4 (4.3)   | 31.1 (6.1)         | 32.9 (6.3)  | 29.8 (5.7)  |
| <20                                     | 5 (4.9%)               | NS          | 5 (5.3%)    | 6 (6.3%)                 | NS           | 6 (7.0%)     | 3 (1.0%)           | 0 (0.0%)    | 3 (1.8%)    |
| 20-<25                                  | 31 (30.1%)             |             | 28 (29.8%)  | 34 (35.4%)               |              | 29 (33.7%)   | 49 (16.4%)         | 13 (10.2%)  | 36 (21.1%)  |
| 25-<30                                  | 34 (33.0%)             |             | 30 (31.9%)  | 36 (37.5%)               |              | 34 (39.5%)   | 90 (30.2%)         | 34 (26.8%)  | 56 (32.8%)  |
| ≥30                                     | 33 (32.0%)             |             | 31 (33.0%)  | 20 (20.8%)               |              | 17 (19.8%)   | 156 (52.4%)        | 80 (63.0%)  | 76 (44.4%)  |
| Diabetes                                | 20 (19.4%)             | NS          | 20 (21.3%)  | 3 (3.1%)                 | NS           | 3 (3.5%)     | 161 (54.0%)        | 68 (53.5%)  | 93 (54.4%)  |
| Transplant recipient                    | 15 (14.6%)             | NS          | 13 (13.8%)  | 0 (0.0%)                 | NS           | 0 (0.0%)     | 0 (0.0%)           | 0 (0.0%)    | 0 (0.0%)    |
| Kidney donor candidates                 | 0 (0.0%)               | NS          | 0 (0.0%)    | 96 (100%)                | NS           | 86 (100%)    | 0 (0.0%)           | 0 (0.0%)    | 0 (0.0%)    |
| Measured GFR, ml/min/1.73m <sup>2</sup> | 52.2 (30.7)            | 52.4 (32.4) | 52.2 (30.7) | 102.1 (18.3)             | 102.8 (11.6) | 102.0 (19.0) | 49.7 (19.8)        | 49.6 (18.9) | 49.8 (20.6) |
| <30                                     | 25 (24.3%)             | NS          | 22 (23.4%)  | 0 (0.0%)                 | NS           | 0 (0.0%)     | 47 (15.8%)         | 17 (13.4%)  | 30 (17.5%)  |
| 30-<60                                  | 39 (37.9%)             |             | 37 (39.4%)  | 1 (1.0%)                 |              | 1 (1.2%)     | 174 (58.4%)        | 79 (62.2%)  | 95 (55.6%)  |
| 60-<90                                  | 29 (28.2%)             |             | 26 (27.7%)  | 22 (22.9%)               |              | 21 (24.4%)   | 63 (21.1%)         | 27 (21.3%)  | 36 (21.1%)  |
| ≥90                                     | 10 (9.7%)              |             | 9 (9.6%)    | 73 (76.0%)               |              | 64 (74.4%)   | 14 (4.7%)          | 4 (3.2%)    | 10 (5.9%)   |
| Creatinine, mg/dL                       | 1.79 (1.22)            | 1.65 (1.44) | 1.80 (1.22) | 0.87 (0.17)              | 1.00 (0.16)  | 0.86 (0.16)  | 1.80 (0.58)        | 1.88 (0.59) | 1.74 (0.57) |

|                                         | CRISP <sup>41</sup> |              |             | DNA Donors   |              |              | DNA CKD     |             |             |
|-----------------------------------------|---------------------|--------------|-------------|--------------|--------------|--------------|-------------|-------------|-------------|
|                                         | Overall             | Black        | Non-Black   | Overall      | Black        | Non-Black    | Overall     | Black       | Non-Black   |
| N                                       | 198                 | 21 (10.6%)   | 177 (89.4%) | 109          | 19 (17.4%)   | 90 (82.6%)   | 209         | 61 (29.2%)  | 148 (70.8%) |
| Age, years                              | 33.6 (7.8)          | 34.2 (8.9)   | 33.5 (7.7)  | 41.5 (11.1)  | 35.9 (9.1)   | 42.7 (11.1)  | 53.4 (13.8) | 51.8 (13.6) | 54.1 (13.9) |
| <40                                     | 145 (73.2%)         | 13 (61.9%)   | 132 (74.6%) | 48 (44.0%)   | 13 (68.4%)   | 35 (38.9%)   | 32 (15.3%)  | 9 (14.8%)   | 23 (15.5%)  |
| 40-65                                   | 53 (26.8%)          | 8 (38.1%)    | 45 (25.4%)  | 61 (56.0%)   | 6 (31.6%)    | 55 (61.1%)   | 137 (65.6%) | 42 (68.9%)  | 95 (64.2%)  |
| >65                                     | 0 (0.0%)            | 0 (0.0%)     | 0 (0.0%)    | 0 (0.0%)     | 0 (0.0%)     | 0 (0.0%)     | 40 (19.1%)  | 10 (16.4%)  | 30 (20.3%)  |
| Female                                  | 118 (59.6%)         | 16 (76.2%)   | 102 (57.6%) | 70 (64.2%)   | 12 (63.2%)   | 58 (64.4%)   | 111 (53.1%) | 34 (55.7%)  | 77 (52.0%)  |
| BMI, kg/m <sup>2</sup>                  | 26.1 (5.3)          | 26.7 (5.3)   | 26.0 (5.3)  | 28.8 (5.9)   | 31.5 (6.8)   | 28.2 (5.6)   | 30.5 (6.8)  | 32.9 (6.7)  | 29.6 (6.7)  |
| <20                                     | 15 (7.6%)           | 1 (4.8%)     | 14 (7.9%)   | 2 (1.8%)     | 0 (0.0%)     | 2 (2.2%)     | 5 (2.4%)    | 0 (0.0%)    | 5 (3.4%)    |
| 20-<25                                  | 79 (39.9%)          | 6 (28.6%)    | 73 (41.2%)  | 30 (27.5%)   | 4 (21.1%)    | 26 (28.9%)   | 40 (19.1%)  | 5 (8.2%)    | 35 (23.7%)  |
| 25-<30                                  | 69 (34.9%)          | 10 (47.6%)   | 59 (33.3%)  | 33 (30.3%)   | 2 (10.5%)    | 31 (34.4%)   | 61 (29.2%)  | 16 (26.2%)  | 45 (30.4%)  |
| ≥30                                     | 35 (17.7%)          | 4 (19.1%)    | 31 (17.5%)  | 44 (40.4%)   | 13 (68.4%)   | 31 (34.4%)   | 103 (49.3%) | 40 (65.6%)  | 63 (42.6%)  |
| Diabetes                                | 0 (0.0%)            | 0 (0.0%)     | 0 (0.0%)    | 0 (0.0%)     | 0 (0.0%)     | 0 (0.0%)     | 2 (1.0%)    | 0 (0.0%)    | 2 (1.4%)    |
| Transplant recipient                    | 0 (0.0%)            | 0 (0.0%)     | 0 (0.0%)    | 0 (0.0%)     | 0 (0.0%)     | 0 (0.0%)     | 0 (0.0%)    | 0 (0.0%)    | 0 (0.0%)    |
| Kidney donor candidates                 | 0 (0.0%)            | 0 (0.0%)     | 0 (0.0%)    | 109 (100%)   | 19 (100%)    | 90 (100%)    | 0 (0.0%)    | 0 (0.0%)    | 0 (0.0%)    |
| Measured GFR, ml/min/1.73m <sup>2</sup> | 95.2 (23.4)         | 102.1 (26.4) | 94.3 (23.0) | 104.0 (19.3) | 105.4 (16.0) | 103.7 (20.0) | 39.2 (28.6) | 35.1 (28.2) | 41.0 (28.6) |
| <30                                     | 0 (0.0%)            | 0 (0.0%)     | 0 (0.0%)    | 0 (0.0%)     | 0 (0.0%)     | 0 (0.0%)     | 107 (51.2%) | 33 (54.1%)  | 74 (50.0%)  |
| 30-<60                                  | 7 (3.5%)            | 0 (0.0%)     | 7 (4.0%)    | 1 (0.9%)     | 0 (0.0%)     | 1 (1.1%)     | 47 (22.5%)  | 15 (24.6%)  | 32 (21.6%)  |
| 60-<90                                  | 88 (44.4%)          | 8 (38.1%)    | 80 (45.2%)  | 24 (22.0%)   | 2 (10.5%)    | 22 (24.4%)   | 40 (19.1%)  | 9 (14.8%)   | 31 (21.0%)  |
| ≥90                                     | 103 (52.0%)         | 13 (61.9%)   | 90 (50.9%)  | 84 (77.1%)   | 17 (89.5%)   | 67 (74.4%)   | 15 (7.2%)   | 4 (6.6%)    | 11 (7.4%)   |
| Creatinine, mg/dL                       | 0.98 (0.20)         | 0.95 (0.23)  | 0.98 (0.20) | 0.83 (0.20)  | 0.91 (0.20)  | 0.81 (0.20)  | 2.66 (1.82) | 3.35 (2.24) | 2.37 (1.54) |

|                                         | NephroTest CKD <sup>55</sup> |             |             | NephroTest Donor <sup>55</sup> |             |             | Lund CKD <sup>49</sup> | Lund Donor <sup>49</sup> |
|-----------------------------------------|------------------------------|-------------|-------------|--------------------------------|-------------|-------------|------------------------|--------------------------|
|                                         | Overall                      | Black       | Non-Black   | Overall                        | Black       | Non-Black   | Non-Black              | Non-Black                |
| N                                       | 313                          | 25 (8.0%)   | 288 (92.0%) | 382                            | 43 (11.3%)  | 339 (88.7%) | 387 (100.0%)           | 7 (100.0%)               |
| Age, years                              | 58.6 (14.7)                  | 55.6 (10.8) | 58.8 (15.0) | 44.9 (12.5)                    | 40.1 (11.6) | 45.5 (12.5) | 57.1 (15.5)            | 49.0 (10.3)              |
| <40                                     | 38 (12.1%)                   | 2 (8.0%)    | 36 (12.5%)  | 143 (37.4%)                    | 22 (51.2%)  | 121 (35.7%) | 56 (14.5%)             | NS                       |
| 40-65                                   | 159 (50.8%)                  | 17 (68.0%)  | 142 (49.3%) | 217 (56.8%)                    | 21 (48.8%)  | 196 (57.8%) | 210 (54.3%)            |                          |
| >65                                     | 116 (37.1%)                  | 6 (24.0%)   | 110 (38.2%) | 22 (5.8%)                      | 0 (0.0%)    | 22 (6.5%)   | 121 (31.3%)            |                          |
| Female                                  | 90 (28.8%)                   | 3 (12.0%)   | 87 (30.2%)  | 215 (56.3%)                    | 23 (53.5%)  | 192 (56.6%) | 187 (48.3%)            |                          |
| BMI, kg/m <sup>2</sup>                  | 25.9 (4.4)                   | 24.6 (3.6)  | 26.1 (4.5)  | 25.5 (4.3)                     | 26.4 (4.5)  | 25.4 (4.2)  | 25.6 (5.4)             | 26.0 (2.0)               |
| <20                                     | 22 (7.0%)                    | 2 (8.0%)    | 20 (6.9%)   | 22 (5.8%)                      | 1 (2.3%)    | 21 (6.2%)   | 45 (11.6%)             | NS                       |
| 20-<25                                  | 117 (37.4%)                  | 13 (52.0%)  | 104 (36.1%) | 164 (42.9%)                    | 15 (34.9%)  | 149 (44.0%) | 154 (39.8%)            |                          |
| 25-<30                                  | 119 (38.0%)                  | 8 (32.0%)   | 111 (38.5%) | 149 (39.0%)                    | 19 (44.2%)  | 130 (38.4%) | 129 (33.3%)            |                          |
| ≥30                                     | 55 (17.6%)                   | 2 (8.0%)    | 53 (18.4%)  | 47 (12.3%)                     | 8 (18.6%)   | 39 (11.5%)  | 59 (15.3%)             |                          |
| Diabetes                                | 72 (23.0%)                   | 5 (20.0%)   | 67 (23.3%)  | 0 (0.0%)                       | 0 (0.0%)    | 0 (0.0%)    | 78 (20.2%)             | NS                       |
| Transplant recipient                    | 0 (0.0%)                     | 0 (0.0%)    | 0 (0.0%)    | 0 (0.0%)                       | 0 (0.0%)    | 0 (0.0%)    | 44 (11.4%)             | NS                       |
| Kidney donor candidates                 | 0 (0.0%)                     | 0 (0.0%)    | 0 (0.0%)    | 353 (92.4%)                    | 43 (100.0%) | 310 (91.5%) | 0 (0.0%)               | NS                       |
| Measured GFR, ml/min/1.73m <sup>2</sup> | 35.4 (17.7)                  | 41.2 (21.9) | 34.8 (17.3) | 96.2 (14.4)                    | 95.9 (14.2) | 96.3 (14.5) | 61.4 (31.9)            | 88.4 (18.2)              |
| <30                                     | 130 (41.5%)                  | 9 (36.0%)   | 121 (42.0%) | 0 (0.0%)                       | 0 (0.0%)    | 0 (0.0%)    | 78 (20.2%)             | NS                       |
| 30-<60                                  | 151 (48.2%)                  | 12 (48.0%)  | 139 (48.3%) | 2 (0.5%)                       | 0 (0.0%)    | 2 (0.6%)    | 124 (32.0%)            |                          |
| 60-<90                                  | 28 (9.0%)                    | 3 (12.0%)   | 25 (8.7%)   | 133 (34.8%)                    | 13 (30.2%)  | 120 (35.4%) | 102 (26.4%)            |                          |
| ≥90                                     | 4 (1.3%)                     | 1 (4.0%)    | 3 (1.0%)    | 247 (64.7%)                    | 30 (69.8%)  | 217 (64.0%) | 83 (21.5%)             |                          |
| Creatinine, mg/dL                       | 2.44 (1.18)                  | 2.61 (1.39) | 2.43 (1.16) | 0.88 (0.15)                    | 0.95 (0.16) | 0.87 (0.15) | 1.45 (1.22)            | 0.85 (0.25)              |

Abbreviations: CCF P, Cleveland Clinic Foundation Prospective; CKD, Chronic Kidney Disease; CRIC, Chronic Renal Insufficiency Cohort; CRISP, Consortium for Radiologic Imaging Studies of Polycystic Kidney Disease; DNA, Dallas Nephrology Associates; Inter Diabetes, International Diabetic Nephropathy Study Group [GFR

measures performed at the same centers as the RASS clinical sites, since it only includes 16 participants, it is grouped with RASS for the remainder of the analyses]; RASS, Renin Angiotensin System Study; GFR, glomerular filtration rate; BMI, body mass index; SD, standard deviation; Scr, serum creatinine. To convert GFR from mL/min/1.73 m<sup>2</sup> to mL/s/m<sup>2</sup>, multiply by 0.0167. To convert serum creatinine from mg/dL to μmol/L, multiply by 88.4.



**Table S10:** Current and new CKD-EPI equations for estimating GFR on the natural scale expressed for specified sex, serum creatinine or serum cystatin C

| Coefficients                                  | Sex    | Serum Creatinine (mg/dL) | Serum Cystatin C (mg/L) | Equation                                                                                                                   |
|-----------------------------------------------|--------|--------------------------|-------------------------|----------------------------------------------------------------------------------------------------------------------------|
| <b>CKD-EPI creatinine equation</b>            |        |                          |                         |                                                                                                                            |
| ASR, current                                  | Female | ≤0.7                     |                         | $GFR = 141 \times (Scr/0.7)^{-0.329} \times 0.9929^{Age} \times 1.159$ [if Black] $\times 1.018$                           |
|                                               |        | >0.7                     |                         | $GFR = 141 \times (Scr/0.7)^{-1.209} \times 0.9929^{Age} \times 1.159$ [if Black] $\times 1.018$                           |
|                                               | Male   | ≤0.9                     |                         | $GFR = 141 \times (Scr/0.9)^{-0.411} \times 0.9929^{Age} \times 1.159$ [if Black]                                          |
|                                               |        | >0.9                     |                         | $GFR = 141 \times (Scr/0.9)^{-1.209} \times 0.9929^{Age} \times 1.159$ [if Black]                                          |
| ASR-NB, new                                   | Female | ≤0.7                     |                         | $GFR = 141 \times (Scr/0.7)^{-0.329} \times 0.9929^{Age} \times 1.018$                                                     |
|                                               |        | >0.7                     |                         | $GFR = 141 \times (Scr/0.7)^{-1.209} \times 0.9929^{Age} \times 1.018$                                                     |
|                                               | Male   | ≤0.9                     |                         | $GFR = 141 \times (Scr/0.9)^{-0.411} \times 0.9929^{Age}$                                                                  |
|                                               |        | >0.9                     |                         | $GFR = 141 \times (Scr/0.9)^{-1.209} \times 0.9929^{Age}$                                                                  |
| AS, new                                       | Female | ≤0.7                     |                         | $GFR = 142 \times (Scr/0.7)^{-0.241} \times 0.9938^{Age} \times 1.012$                                                     |
|                                               |        | >0.7                     |                         | $GFR = 142 \times (Scr/0.7)^{-1.200} \times 0.9938^{Age} \times 1.012$                                                     |
|                                               | Male   | ≤0.9                     |                         | $GFR = 142 \times (Scr/0.9)^{-0.302} \times 0.9938^{Age}$                                                                  |
|                                               |        | >0.9                     |                         | $GFR = 142 \times (Scr/0.9)^{-1.200} \times 0.9938^{Age}$                                                                  |
| <b>CKD-EPI cystatin C equation 2012</b>       |        |                          |                         |                                                                                                                            |
| AS, current                                   |        |                          | ≤0.8                    | $GFR = 133 \times (Scys/0.8)^{-0.499} \times 0.9962^{Age} \times 0.932$ [if Female]                                        |
|                                               |        |                          | >0.8                    | $GFR = 133 \times (Scys/0.8)^{-1.328} \times 0.9962^{Age} \times 0.932$ [if Female]                                        |
| <b>CKD-EPI creatinine-cystatin C equation</b> |        |                          |                         |                                                                                                                            |
| ASR, current                                  | Female | ≤0.7                     | ≤0.8                    | $GFR = 135 \times (Scr/0.7)^{-0.248} \times (Scys/0.8)^{-0.375} \times 0.9952^{Age} \times 1.08$ [if Black] $\times 0.969$ |
|                                               |        |                          | >0.8                    | $GFR = 135 \times (Scr/0.7)^{-0.248} \times (Scys/0.8)^{-0.711} \times 0.9952^{Age} \times 1.08$ [if Black] $\times 0.969$ |
|                                               |        | >0.7                     | ≤0.8                    | $GFR = 135 \times (Scr/0.7)^{-0.601} \times (Scys/0.8)^{-0.375} \times 0.9952^{Age} \times 1.08$ [if Black] $\times 0.969$ |
|                                               |        |                          | >0.8                    | $GFR = 135 \times (Scr/0.7)^{-0.601} \times (Scys/0.8)^{-0.711} \times 0.9952^{Age} \times 1.08$ [if Black] $\times 0.969$ |
|                                               | Male   | ≤0.9                     | ≤0.8                    | $GFR = 135 \times (Scr/0.9)^{-0.207} \times (Scys/0.8)^{-0.375} \times 0.9952^{Age} \times 1.08$ [if Black]                |
|                                               |        |                          | >0.8                    | $GFR = 135 \times (Scr/0.9)^{-0.207} \times (Scys/0.8)^{-0.711} \times 0.9952^{Age} \times 1.08$ [if Black]                |
|                                               |        | >0.9                     | ≤0.8                    | $GFR = 135 \times (Scr/0.9)^{-0.601} \times (Scys/0.8)^{-0.375} \times 0.9952^{Age} \times 1.08$ [if Black]                |
|                                               |        |                          | >0.8                    | $GFR = 135 \times (Scr/0.9)^{-0.601} \times (Scys/0.8)^{-0.711} \times 0.9952^{Age} \times 1.08$ [if Black]                |
| ASR-NB, new                                   | Female | ≤0.7                     | ≤0.8                    | $GFR = 135 \times (Scr/0.7)^{-0.248} \times (Scys/0.8)^{-0.375} \times 0.9952^{Age} \times 0.969$                          |
|                                               |        |                          | >0.8                    | $GFR = 135 \times (Scr/0.7)^{-0.248} \times (Scys/0.8)^{-0.711} \times 0.9952^{Age} \times 0.969$                          |
|                                               |        | >0.7                     | ≤0.8                    | $GFR = 135 \times (Scr/0.7)^{-0.601} \times (Scys/0.8)^{-0.375} \times 0.9952^{Age} \times 0.969$                          |
|                                               |        |                          | >0.8                    | $GFR = 135 \times (Scr/0.7)^{-0.601} \times (Scys/0.8)^{-0.711} \times 0.9952^{Age} \times 0.969$                          |
|                                               | Male   | ≤0.9                     | ≤0.8                    | $GFR = 135 \times (Scr/0.9)^{-0.207} \times (Scys/0.8)^{-0.375} \times 0.9952^{Age}$                                       |
|                                               |        |                          | >0.8                    | $GFR = 135 \times (Scr/0.9)^{-0.207} \times (Scys/0.8)^{-0.711} \times 0.9952^{Age}$                                       |
|                                               |        | >0.9                     | ≤0.8                    | $GFR = 135 \times (Scr/0.9)^{-0.601} \times (Scys/0.8)^{-0.375} \times 0.9952^{Age}$                                       |
|                                               |        |                          | >0.8                    | $GFR = 135 \times (Scr/0.9)^{-0.601} \times (Scys/0.8)^{-0.711} \times 0.9952^{Age}$                                       |
| AS, new                                       | Female | ≤0.7                     | ≤0.8                    | $GFR = 135 \times (Scr/0.7)^{-0.219} \times (Scys/0.8)^{-0.323} \times 0.9961^{Age} \times 0.963$                          |
|                                               |        |                          | >0.8                    | $GFR = 135 \times (Scr/0.7)^{-0.219} \times (Scys/0.8)^{-0.778} \times 0.9961^{Age} \times 0.963$                          |
|                                               |        | >0.7                     | ≤0.8                    | $GFR = 135 \times (Scr/0.7)^{-0.544} \times (Scys/0.8)^{-0.323} \times 0.9961^{Age} \times 0.963$                          |
|                                               |        |                          | >0.8                    | $GFR = 135 \times (Scr/0.7)^{-0.544} \times (Scys/0.8)^{-0.778} \times 0.9961^{Age} \times 0.963$                          |
|                                               | Male   | ≤0.9                     | ≤0.8                    | $GFR = 135 \times (Scr/0.9)^{-0.144} \times (Scys/0.8)^{-0.323} \times 0.9961^{Age}$                                       |
|                                               |        |                          | >0.8                    | $GFR = 135 \times (Scr/0.9)^{-0.144} \times (Scys/0.8)^{-0.778} \times 0.9961^{Age}$                                       |
|                                               |        | >0.9                     | ≤0.8                    | $GFR = 135 \times (Scr/0.9)^{-0.544} \times (Scys/0.8)^{-0.323} \times 0.9961^{Age}$                                       |
|                                               |        |                          | >0.8                    | $GFR = 135 \times (Scr/0.9)^{-0.544} \times (Scys/0.8)^{-0.778} \times 0.9961^{Age}$                                       |

CKD-EPI, Chronic Kidney Disease Epidemiology Collaboration. To convert GFR from mL/min/1.73 m<sup>2</sup> to mL/s/1.73 m<sup>2</sup>, multiply by 0.0167. Serum creatinine is expressed in mg/dl. Serum cystatin C is expressed in mg/L. To convert serum creatinine from mg/dL to μmol/L, multiply by 88.4.

\*\* The CKD-EPI Creatinine Age, Sex, Race Equation (2009), that we developed previously,<sup>1</sup> can be expressed as a single equation  $141 \times \min(\text{Scr}/k, 1)^\alpha \times \max(\text{Scr}/k, 1)^{-1.209} \times 0.9929^{\text{age}} \times 1.018$  [if female]  $\times 1.159$  [if Black] where Scr is serum creatinine k is 0.7 for females and 0.9 males,  $\alpha$  is -0.329 for females and -0.411 for males, min indicates the minimum of Scr/k or 1, max indicates the maximum of Scr/k or 1

\*\* The CKD-EPI Creatinine Age, Sex Equation (2021) can be expressed as a single equation  $142 \times \min(\text{Scr}/k, 1)^\alpha \times \max(\text{Scr}/k, 1)^{-1.200} \times 0.9938^{\text{age}} \times 1.012$  [if female] where Scr is serum creatinine, k is 0.7 for females and 0.9 males,  $\alpha$  is -0.241 for females and -0.302 for males, min indicates the minimum of Scr/k or 1, max indicates the maximum of Scr/k or 1

\*\* The CKD-EPI Cystatin C Age, Sex Equation (2012), that we developed previously,<sup>2</sup> can be expressed as a single equation  $133 \times \min(\text{Scys}/0.8, 1)^{-0.499} \times \max(\text{Scys}/0.8, 1)^{-1.328} \times 0.9962^{\text{age}} \times 0.932$  [if female] where Scys is serum cystatin C

\*\* The CKD-EPI Creatinine-Cystatin C Age, Sex, Race Equation (2012), that we developed previously,<sup>2</sup> can be expressed as a single equation  $135 \times \min(\text{Scr}/k, 1)^\alpha \times \max(\text{Scr}/k, 1)^{-0.601} \times \min(\text{Scys}/0.8, 1)^{-0.375} \times \max(\text{Scys}/0.8, 1)^{-0.711} \times 0.9952^{\text{age}} \times 0.969$  [if female]  $\times 1.08$  [if Black] where Scr is serum creatinine Scys is serum cystatin C, k is 0.7 for females and 0.9 males,  $\alpha$  is -0.248 for females and -0.207 for males, min indicates the minimum of Scr/k or 1, max indicates the maximum of Scr/k or 1.

\*\* The CKD-EPI Creatinine-Cystatin C Age, Sex Equation (2021) can be expressed as a single equation  $135 \times \min(\text{Scr}/k, 1)^\alpha \times \max(\text{Scr}/k, 1)^{-0.544} \times \min(\text{Scys}/0.8, 1)^{-0.323} \times \max(\text{Scys}/0.8, 1)^{-0.778} \times 0.9961^{\text{age}} \times 0.963$  [if female] where Scr is serum creatinine Scys is serum cystatin C, k is 0.7 for females and 0.9 males,  $\alpha$  is -0.219 for females and -0.144 for males, min indicates the minimum of Scr/k or 1, max indicates the maximum of Scr/k or 1

All equations were developed by the CKD-EPI research group.

**Table S11** Estimated GFR using current and new equations for simulated patients at different ages, sex and creatinine or cystatin C levels. Panel a: creatinine levels; Panel b: creatinine and cystatin C equations

**a. Creatinine**

| Race groups | Age                |                                 | 50 years |     |     |    | 75 years |    |     |    |
|-------------|--------------------|---------------------------------|----------|-----|-----|----|----------|----|-----|----|
|             | Creatinine (mg/dl) |                                 | 0.6      | 1   | 1.5 | 2  | 0.6      | 1  | 1.5 | 2  |
| Black       | men                | eGFRcr (ASR) ( <i>current</i> ) | 136      | 101 | 62  | 44 | 114      | 85 | 52  | 37 |
|             |                    | eGFRcr (ASR-NB) ( <i>new</i> )  | 117      | 87  | 54  | 38 | 98       | 73 | 45  | 32 |
|             |                    | eGFRcr (AS) ( <i>new</i> )      | 118      | 92  | 56  | 40 | 101      | 78 | 48  | 34 |
|             | women              | eGFRcr (ASR) ( <i>current</i> ) | 124      | 76  | 47  | 33 | 104      | 64 | 39  | 28 |
|             |                    | eGFRcr (ASR-NB) ( <i>new</i> )  | 107      | 66  | 40  | 28 | 89       | 55 | 34  | 24 |
|             |                    | eGFRcr (AS) ( <i>new</i> )      | 109      | 69  | 42  | 30 | 94       | 59 | 36  | 26 |
| NonBlack    | men                | eGFRcr (ASR) ( <i>current</i> ) | 117      | 87  | 54  | 38 | 98       | 73 | 45  | 32 |
|             |                    | eGFRcr (ASR-NB) ( <i>new</i> )  | 117      | 87  | 54  | 38 | 98       | 73 | 45  | 32 |
|             |                    | eGFRcr (AS) ( <i>new</i> )      | 118      | 92  | 56  | 40 | 101      | 78 | 48  | 34 |
|             | women              | eGFRcr (ASR) ( <i>current</i> ) | 107      | 66  | 40  | 28 | 89       | 55 | 34  | 24 |
|             |                    | eGFRcr (ASR-NB) ( <i>new</i> )  | 107      | 66  | 40  | 28 | 89       | 55 | 34  | 24 |
|             |                    | eGFRcr (AS) ( <i>new</i> )      | 109      | 69  | 42  | 30 | 94       | 59 | 36  | 26 |

Abbreviations: eGFRcr, estimated glomerular filtration rate creatinine equation; A, age; S, sex; R, race; Non-Black (NB) refers to equations in which Black race is removed

**b. Creatinine- Cystatin C equations**

| Cys, mg/L | Race groups | Age                |                                     | 50 years |     |     |    | 75 years |    |     |    |    |
|-----------|-------------|--------------------|-------------------------------------|----------|-----|-----|----|----------|----|-----|----|----|
|           |             | Creatinine (mg/dl) |                                     | 0.6      | 1   | 1.5 | 2  | 0.6      | 1  | 1.5 | 2  |    |
| 1         | Black       | men                | eGFRcr-cys (ASR) ( <i>current</i> ) |          | 105 | 91  | 71 | 60       | 93 | 80  | 63 | 53 |
|           |             |                    | eGFRcr-cys (ASR-NB) ( <i>new</i> )  |          | 98  | 84  | 66 | 55       | 86 | 74  | 58 | 49 |
|           |             |                    | eGFRcr-cys (AS) ( <i>new</i> )      |          | 99  | 88  | 71 | 60       | 90 | 80  | 64 | 55 |
|           |             | women              | eGFRcr-cys (ASR) ( <i>current</i> ) |          | 97  | 76  | 59 | 50       | 86 | 67  | 52 | 44 |
|           |             |                    | eGFRcr-cys (ASR-NB) ( <i>new</i> )  |          | 90  | 70  | 55 | 46       | 80 | 62  | 48 | 41 |
|           |             |                    | eGFRcr-cys (AS) ( <i>new</i> )      |          | 93  | 74  | 59 | 51       | 84 | 67  | 54 | 46 |
|           | NonBlack    | men                | eGFRcr-cys (ASR) ( <i>current</i> ) |          | 98  | 84  | 66 | 55       | 86 | 74  | 58 | 49 |
|           |             |                    | eGFRcr-cys (ASR-NB) ( <i>new</i> )  |          | 98  | 84  | 66 | 55       | 86 | 74  | 58 | 49 |
|           |             |                    | eGFRcr-cys (AS) ( <i>new</i> )      |          | 99  | 88  | 71 | 60       | 90 | 80  | 64 | 55 |
|           |             | women              | eGFRcr-cys (ASR) ( <i>current</i> ) |          | 90  | 70  | 55 | 46       | 80 | 62  | 48 | 41 |
|           |             |                    | eGFRcr-cys (ASR-NB) ( <i>new</i> )  |          | 90  | 70  | 55 | 46       | 80 | 62  | 48 | 41 |
|           |             |                    | eGFRcr-cys (AS) ( <i>new</i> )      |          | 93  | 74  | 59 | 51       | 84 | 67  | 54 | 46 |
| 1.5       | Black       | men                | eGFRcr-cys (ASR) ( <i>current</i> ) |          | 79  | 68  | 53 | 45       | 70 | 60  | 47 | 40 |
|           |             |                    | eGFRcr-cys (ASR-NB) ( <i>new</i> )  |          | 73  | 63  | 49 | 42       | 64 | 56  | 44 | 37 |
|           |             |                    | eGFRcr-cys (AS) ( <i>new</i> )      |          | 72  | 64  | 52 | 44       | 65 | 58  | 47 | 40 |
|           |             | women              | eGFRcr-cys (ASR) ( <i>current</i> ) |          | 73  | 57  | 44 | 37       | 64 | 50  | 39 | 33 |
|           |             |                    | eGFRcr-cys (ASR-NB) ( <i>new</i> )  |          | 68  | 53  | 41 | 35       | 60 | 46  | 36 | 31 |
|           |             |                    | eGFRcr-cys (AS) ( <i>new</i> )      |          | 68  | 54  | 43 | 37       | 62 | 49  | 39 | 34 |
|           | NonBlack    | men                | eGFRcr-cys (ASR) ( <i>current</i> ) |          | 73  | 63  | 49 | 42       | 64 | 56  | 44 | 37 |
|           |             |                    | eGFRcr-cys (ASR-NB) ( <i>new</i> )  |          | 73  | 63  | 49 | 42       | 64 | 56  | 44 | 37 |
|           |             |                    | eGFRcr-cys (AS) ( <i>new</i> )      |          | 72  | 64  | 52 | 44       | 65 | 58  | 47 | 40 |
|           |             | women              | eGFRcr-cys (ASR) ( <i>current</i> ) |          | 68  | 53  | 41 | 35       | 60 | 46  | 36 | 31 |
|           |             |                    | eGFRcr-cys (ASR-NB) ( <i>new</i> )  |          | 68  | 53  | 41 | 35       | 60 | 46  | 36 | 31 |
|           |             |                    | eGFRcr-cys (AS) ( <i>new</i> )      |          | 68  | 54  | 43 | 37       | 62 | 49  | 39 | 34 |

Abbreviations: eGFRcr, estimated glomerular filtration rate creatinine equation; eGFRcys, estimated glomerular filtration rate cystatin C equation; eGFRcr-cys, estimated glomerular filtration rate creatinine equation; A, age; S, sex; R, race; Non-Black (NB) refers to equations in which Black race is removed

**Table S12:** Performance of current and new creatinine GFR estimating equations in development dataset

a. 2009 development dataset

| Equation                        | Log GFR scale           |                      | GFR scale            |
|---------------------------------|-------------------------|----------------------|----------------------|
|                                 | Bias                    | RMSE                 | Bias                 |
| Overall                         |                         |                      |                      |
| eGFRcr (ASR) ( <i>current</i> ) | 0.000 (-0.005, 0.005)   | 0.236 (0.229, 0.242) | 0.40 (0.14, 0.66)    |
| eGFRcr (ASR-NB) ( <i>new</i> )  | 0.046 (0.041, 0.051)    | 0.249 (0.243, 0.256) | 2.31 (2.06, 2.65)    |
| eGFRcr (AS) ( <i>new</i> )      | 0.000 (-0.005, 0.005)   | 0.244 (0.238, 0.251) | 0.28 (0.01, 0.52)    |
| Black                           |                         |                      |                      |
| eGFRcr (ASR) ( <i>current</i> ) | 0.000 (-0.009, 0.009)   | 0.243 (0.232, 0.254) | -0.04 (-0.61, 0.53)  |
| eGFRcr (ASR-NB) ( <i>new</i> )  | 0.146 (0.136, 0.155)    | 0.283 (0.274, 0.293) | 6.10 (5.70, 6.61)    |
| eGFRcr (AS) ( <i>new</i> )      | 0.091 (0.081, 0.1)      | 0.258 (0.248, 0.268) | 4.04 (3.54, 4.49)    |
| Non-Black                       |                         |                      |                      |
| eGFRcr (ASR) ( <i>current</i> ) | 0.000 (-0.006, 0.006)   | 0.232 (0.225, 0.241) | 0.52 (0.25, 0.84)    |
| eGFRcr (ASR-NB) ( <i>new</i> )  | 0.000 (-0.006, 0.006)   | 0.232 (0.225, 0.240) | 0.52 (0.25, 0.84)    |
| eGFRcr (AS) ( <i>new</i> )      | -0.042 (-0.048, -0.036) | 0.238 (0.230, 0.247) | -1.41 (-1.65, -1.11) |

Bias on the log scale is computed as mean of the difference between log measured and log estimated GFR. Bias on the natural scale is computed as the median of the difference between measured and estimated GFR. RMSE, root mean square error, is a measure of model fit and computed on the log scale. Abbreviations: eGFRcr, estimated glomerular filtration rate creatinine equation; A, age; S, sex; R, race; Non-Black (NB) refers to equations in which Black race is removed

b. Performance of new eGFRcr (AS) equation weighted for proportion of Black individuals in the 2009 development dataset

| Equation                                                                                                                                                                                                                                                                                                                                                                                                                                                                                | Log GFR scale           |                      | GFR scale            |
|-----------------------------------------------------------------------------------------------------------------------------------------------------------------------------------------------------------------------------------------------------------------------------------------------------------------------------------------------------------------------------------------------------------------------------------------------------------------------------------------|-------------------------|----------------------|----------------------|
|                                                                                                                                                                                                                                                                                                                                                                                                                                                                                         | Bias                    | RMSE                 | Bias                 |
| <b>Overall</b>                                                                                                                                                                                                                                                                                                                                                                                                                                                                          |                         |                      |                      |
| eGFRcr (AS) (current population of 31%) ( <i>new</i> )                                                                                                                                                                                                                                                                                                                                                                                                                                  | 0.000 (-0.005, 0.005)   | 0.244 (0.238, 0.251) | 0.28 (0.01, 0.52)    |
| <b>Weighted</b>                                                                                                                                                                                                                                                                                                                                                                                                                                                                         |                         |                      |                      |
| eGFRcr (AS-0%)                                                                                                                                                                                                                                                                                                                                                                                                                                                                          | 0.000 (-0.005, 0.005)   | 0.232 (0.224, 0.240) | 0.43 (0.09, 0.77)    |
| eGFRcr (AS-13%)                                                                                                                                                                                                                                                                                                                                                                                                                                                                         | 0.000 (-0.005, 0.005)   | 0.239 (0.231, 0.246) | 0.35 (0.07, 0.61)    |
| eGFRcr (AS-50%)                                                                                                                                                                                                                                                                                                                                                                                                                                                                         | 0.000 (-0.005, 0.005)   | 0.246 (0.239, 0.253) | 0.28 (-0.01, 0.58)   |
| eGFRcr (AS-100%)                                                                                                                                                                                                                                                                                                                                                                                                                                                                        | 0.000 (-0.005, 0.005)   | 0.238 (0.227, 0.250) | 0.32 (-0.11, 0.74)   |
| <b>Black</b>                                                                                                                                                                                                                                                                                                                                                                                                                                                                            |                         |                      |                      |
| eGFRcr (AS) (current population of 31%) ( <i>new</i> )                                                                                                                                                                                                                                                                                                                                                                                                                                  | 0.091 (0.081, 0.1)      | 0.258 (0.248, 0.268) | 4.04 (3.54, 4.49)    |
| <b>Weighted</b>                                                                                                                                                                                                                                                                                                                                                                                                                                                                         |                         |                      |                      |
| eGFRcr (AS-0%)                                                                                                                                                                                                                                                                                                                                                                                                                                                                          | N/A                     | 0.289 (0.279, 0.299) | 6.17 (5.75, 6.77)    |
| eGFRcr (AS-13%)                                                                                                                                                                                                                                                                                                                                                                                                                                                                         | 0.124 (0.115, 0.134)    | 0.273 (0.264, 0.284) | 5.28 (4.67, 5.71)    |
| eGFRcr (AS-50%)                                                                                                                                                                                                                                                                                                                                                                                                                                                                         | 0.062 (0.053, 0.071)    | 0.248 (0.238, 0.259) | 2.92 (2.46, 3.33)    |
| eGFRcr (AS-100%)                                                                                                                                                                                                                                                                                                                                                                                                                                                                        | 0.000 (-0.009, 0.009)   | 0.238 (0.228, 0.250) | 0.32 (-0.12, 0.73)   |
| <b>Non-Black</b>                                                                                                                                                                                                                                                                                                                                                                                                                                                                        |                         |                      |                      |
| eGFRcr (AS)(current population of 31%) ( <i>new</i> )                                                                                                                                                                                                                                                                                                                                                                                                                                   | -0.042 (-0.048, -0.036) | 0.238 (0.230, 0.247) | -1.41 (-1.65, -1.11) |
| <b>Weighted</b>                                                                                                                                                                                                                                                                                                                                                                                                                                                                         |                         |                      |                      |
| eGFRcr (AS-0%)                                                                                                                                                                                                                                                                                                                                                                                                                                                                          | 0.000 (-0.006, 0.006)   | 0.232 (0.224, 0.240) | 0.43 (0.11, 0.78)    |
| eGFRcr (AS-13%)                                                                                                                                                                                                                                                                                                                                                                                                                                                                         | -0.019 (-0.025, -0.013) | 0.233 (0.225, 0.241) | -0.38 (-0.69, -0.06) |
| eGFRcr (AS-50%)                                                                                                                                                                                                                                                                                                                                                                                                                                                                         | -0.062 (-0.068, -0.056) | 0.245 (0.237, 0.254) | -2.34 (-2.62, -2.06) |
| eGFRcr (AS-100%)                                                                                                                                                                                                                                                                                                                                                                                                                                                                        | N/A                     | 0.269 (0.261, 0.278) | -4.56 (-4.86, -4.2)  |
| Bias on the log scale is computed as mean of the difference between log measured and log estimated GFR. Bias on the natural scale is computed as the median of the difference between measured and estimated GFR. RMSE, root mean square error, is a measure of model fit and computed on the log scale. Abbreviations: eGFRcr, estimated glomerular filtration rate creatinine equation; A, age; S, sex; R, race; NB, Non-Black; Weighted, weighted for proportion of Black population |                         |                      |                      |

c. Performance of current and new creatinine-cystatin C GFR estimating equations in the 2012 cystatin C development dataset

| Equation                                                                                                                                                                                                                                                                                                                                                                                                                                                                                                                                                                                                                                    | Log GFR scale          |                      | GFR scale            |
|---------------------------------------------------------------------------------------------------------------------------------------------------------------------------------------------------------------------------------------------------------------------------------------------------------------------------------------------------------------------------------------------------------------------------------------------------------------------------------------------------------------------------------------------------------------------------------------------------------------------------------------------|------------------------|----------------------|----------------------|
|                                                                                                                                                                                                                                                                                                                                                                                                                                                                                                                                                                                                                                             | Bias                   | RMSE                 | Bias                 |
| <b>Overall</b>                                                                                                                                                                                                                                                                                                                                                                                                                                                                                                                                                                                                                              |                        |                      |                      |
| eGFRcys (AS) ( <i>current</i> )                                                                                                                                                                                                                                                                                                                                                                                                                                                                                                                                                                                                             | 0.000 (-0.006, 0.006)  | 0.224 (0.217, 0.231) | 0.31 (-0.07, 0.59)   |
| eGFRcr-cys (ASR) ( <i>current</i> )                                                                                                                                                                                                                                                                                                                                                                                                                                                                                                                                                                                                         | 0.000 (-0.005, 0.005)  | 0.195 (0.188, 0.202) | 0.09 (-0.14, 0.33)   |
| eGFRcr-cys (ASR-NB) ( <i>new</i> )                                                                                                                                                                                                                                                                                                                                                                                                                                                                                                                                                                                                          | 0.031 (0.025, 0.036)   | 0.201 (0.194, 0.207) | 1.60 (1.32, 1.92)    |
| eGFRcr-cys (AS) ( <i>new</i> )                                                                                                                                                                                                                                                                                                                                                                                                                                                                                                                                                                                                              | 0.000 (-0.005, 0.005)  | 0.197 (0.191, 0.204) | 0.04 (-0.27, 0.33)   |
| <b>Black</b>                                                                                                                                                                                                                                                                                                                                                                                                                                                                                                                                                                                                                                |                        |                      |                      |
| eGFRcys (AS) ( <i>current</i> )                                                                                                                                                                                                                                                                                                                                                                                                                                                                                                                                                                                                             | -0.004 (-0.014, 0.006) | 0.235 (0.225, 0.244) | 0.04 (-0.34, 0.52)   |
| eGFRcr-cys (ASR) ( <i>current</i> )                                                                                                                                                                                                                                                                                                                                                                                                                                                                                                                                                                                                         | 0.000 (-0.009, 0.009)  | 0.204 (0.195, 0.214) | 0.25 (-0.29, 0.76)   |
| eGFRcr-cys (ASR-NB) ( <i>new</i> )                                                                                                                                                                                                                                                                                                                                                                                                                                                                                                                                                                                                          | 0.077 (0.069, 0.086)   | 0.218 (0.210, 0.228) | 3.76 (3.30, 4.18)    |
| eGFRcr-cys (AS) ( <i>new</i> )                                                                                                                                                                                                                                                                                                                                                                                                                                                                                                                                                                                                              | 0.036 (0.027, 0.044)   | 0.208 (0.199, 0.217) | 1.89 (1.34, 2.47)    |
| <b>NonBlack</b>                                                                                                                                                                                                                                                                                                                                                                                                                                                                                                                                                                                                                             |                        |                      |                      |
| eGFRcys (AS) ( <i>current</i> )                                                                                                                                                                                                                                                                                                                                                                                                                                                                                                                                                                                                             | 0.003 (-0.005, 0.01)   | 0.216 (0.208, 0.226) | 0.50 (0.01, 0.96)    |
| eGFRcr-cys (ASR) ( <i>current</i> )                                                                                                                                                                                                                                                                                                                                                                                                                                                                                                                                                                                                         | 0.000 (-0.006, 0.006)  | 0.188 (0.180, 0.199) | 0.04 (-0.24, 0.30)   |
| eGFRcr-cys (ASR-NB) ( <i>new</i> )                                                                                                                                                                                                                                                                                                                                                                                                                                                                                                                                                                                                          | 0.000 (-0.006, 0.006)  | 0.188 (0.180, 0.199) | 0.04 (-0.24, 0.30)   |
| eGFRcr-cys (AS) ( <i>new</i> )                                                                                                                                                                                                                                                                                                                                                                                                                                                                                                                                                                                                              | -0.023 (-0.03, -0.017) | 0.191 (0.182, 0.201) | -1.15 (-1.50, -0.84) |
| <p>Bias on the log scale is computed as mean of the difference between log measured and log estimated GFR. Bias on the natural scale is computed as the median of the difference between measured and estimated GFR. RMSE, root mean square error, is a measure of model fit and computed on the log scale.</p> <p>Abbreviations: eGFRcr, estimated glomerular filtration rate creatinine equation; eGFRcys, estimated glomerular filtration rate cystatin C equation; eGFRcr-cys, estimated glomerular filtration rate creatinine equation; A, age; S, sex; R, race, Non-Black (NB) refers to equations in which Black race is removed</p> |                        |                      |                      |

d. Performance of new eGFRcr-cys (AS) equation weighted for proportion of Black individuals in the 2012 development dataset

| Equation                                                                                                                                                                                                                                                                                                                                                                                                                                                                                                                                                                                                                        | Log GFR scale           |                      | GFR scale            |
|---------------------------------------------------------------------------------------------------------------------------------------------------------------------------------------------------------------------------------------------------------------------------------------------------------------------------------------------------------------------------------------------------------------------------------------------------------------------------------------------------------------------------------------------------------------------------------------------------------------------------------|-------------------------|----------------------|----------------------|
|                                                                                                                                                                                                                                                                                                                                                                                                                                                                                                                                                                                                                                 | Bias                    | RMSE                 | Bias                 |
| <b>Overall</b>                                                                                                                                                                                                                                                                                                                                                                                                                                                                                                                                                                                                                  |                         |                      |                      |
| eGFRcr-cys (AS) (current population of 40%) ( <i>new</i> )                                                                                                                                                                                                                                                                                                                                                                                                                                                                                                                                                                      | 0.000 (-0.005, 0.005)   | 0.197 (0.191, 0.204) | 0.04 (-0.27, 0.33)   |
| <b>Weighted</b>                                                                                                                                                                                                                                                                                                                                                                                                                                                                                                                                                                                                                 |                         |                      |                      |
| eGFRcr-cys (AS-0%)                                                                                                                                                                                                                                                                                                                                                                                                                                                                                                                                                                                                              | 0.000 (-0.005, 0.005)   | 0.187 (0.178, 0.198) | -0.03 (-0.46, 0.32)  |
| eGFRcr-cys (AS-13%)                                                                                                                                                                                                                                                                                                                                                                                                                                                                                                                                                                                                             | 0.000 (-0.005, 0.005)   | 0.191 (0.183, 0.200) | -0.06 (-0.38, 0.26)  |
| eGFRcr-cys (AS-50%)                                                                                                                                                                                                                                                                                                                                                                                                                                                                                                                                                                                                             | 0.000 (-0.005, 0.005)   | 0.199 (0.192, 0.205) | 0.05 (-0.19, 0.34)   |
| eGFRcr-cys (AS-100%)                                                                                                                                                                                                                                                                                                                                                                                                                                                                                                                                                                                                            | 0.000 (-0.005, 0.005)   | 0.200 (0.191, 0.208) | 0.39 (-0.03, 0.90)   |
| <b>Black</b>                                                                                                                                                                                                                                                                                                                                                                                                                                                                                                                                                                                                                    |                         |                      |                      |
| eGFRcr-cys (AS) (current population of 40%) ( <i>new</i> )                                                                                                                                                                                                                                                                                                                                                                                                                                                                                                                                                                      | 0.036 (0.027, 0.044)    | 0.208 (0.199, 0.217) | 1.89 (1.34, 2.47)    |
| <b>Weighted</b>                                                                                                                                                                                                                                                                                                                                                                                                                                                                                                                                                                                                                 |                         |                      |                      |
| eGFRcr-cys (AS-0%)                                                                                                                                                                                                                                                                                                                                                                                                                                                                                                                                                                                                              | N/A                     | 0.222 (0.213, 0.232) | 3.52 (2.98, 4.15)    |
| eGFRcr-cys (AS-13%)                                                                                                                                                                                                                                                                                                                                                                                                                                                                                                                                                                                                             | 0.058 (0.049, 0.067)    | 0.216 (0.207, 0.225) | 2.85 (2.25, 3.45)    |
| eGFRcr-cys (AS-50%)                                                                                                                                                                                                                                                                                                                                                                                                                                                                                                                                                                                                             | 0.029 (0.02, 0.037)     | 0.205 (0.196, 0.215) | 1.59 (1.04, 2.16)    |
| eGFRcr-cys (AS-100%)                                                                                                                                                                                                                                                                                                                                                                                                                                                                                                                                                                                                            | 0.000 (-0.008, 0.008)   | 0.200 (0.191, 0.209) | 0.39 (-0.12, 0.89)   |
| <b>Non-Black</b>                                                                                                                                                                                                                                                                                                                                                                                                                                                                                                                                                                                                                |                         |                      |                      |
| eGFRcr-cys (AS)(current population of 40%) ( <i>new</i> )                                                                                                                                                                                                                                                                                                                                                                                                                                                                                                                                                                       | -0.023 (-0.03, -0.017)  | 0.191 (0.182, 0.201) | -1.15 (-1.50, -0.84) |
| <b>Weighted</b>                                                                                                                                                                                                                                                                                                                                                                                                                                                                                                                                                                                                                 |                         |                      |                      |
| eGFRcr-cys (AS-0%)                                                                                                                                                                                                                                                                                                                                                                                                                                                                                                                                                                                                              | 0.000 (-0.006, 0.006)   | 0.187 (0.178, 0.198) | -0.03 (-0.46, 0.34)  |
| eGFRcr-cys (AS-13%)                                                                                                                                                                                                                                                                                                                                                                                                                                                                                                                                                                                                             | -0.009 (-0.015, -0.002) | 0.188 (0.179, 0.199) | -0.47 (-0.85, -0.09) |
| eGFRcr-cys (AS-50%)                                                                                                                                                                                                                                                                                                                                                                                                                                                                                                                                                                                                             | -0.029 (-0.035, -0.022) | 0.193 (0.184, 0.203) | -1.43 (-1.71, -1.07) |
| eGFRcr-cys (AS-100%)                                                                                                                                                                                                                                                                                                                                                                                                                                                                                                                                                                                                            | N/A                     | 0.220 (0.212, 0.229) | -1.61 (-1.93, -1.22) |
| <p>Bias on the log scale is computed as mean of the difference between log measured and log estimated GFR. Bias on the natural scale is computed as the median of the difference between measured and estimated GFR. RMSE, root mean square error, is a measure of model fit and computed on the log scale.</p> <p>Abbreviations: eGFRcr, estimated glomerular filtration rate creatinine equation; eGFRcys, estimated glomerular filtration rate cystatin C equation; eGFRcr-cys, estimated glomerular filtration rate creatinine equation; A, age; S, sex; R, race; Weighted, weighted for proportion of Black population</p> |                         |                      |                      |



**Table S13:** Performance in validation dataset

a. Performance in 2021 Validation dataset for equations for current vs new equations

| Equation                                                                                                                                                                                                                                                                                                                                                                                                                                                               | Bias              | IQR               | P <sub>30</sub>   | RMSE                 |
|------------------------------------------------------------------------------------------------------------------------------------------------------------------------------------------------------------------------------------------------------------------------------------------------------------------------------------------------------------------------------------------------------------------------------------------------------------------------|-------------------|-------------------|-------------------|----------------------|
| <b>Overall</b>                                                                                                                                                                                                                                                                                                                                                                                                                                                         |                   |                   |                   |                      |
| eGFRcr (ASR) ( <i>current</i> )                                                                                                                                                                                                                                                                                                                                                                                                                                        | -0.8 (-1.2, -0.3) | 17.0 (16.2, 17.6) | 88.8 (87.8, 89.8) | 0.192 (0.187, 0.197) |
| eGFRcr (ASR-NB) ( <i>new</i> )                                                                                                                                                                                                                                                                                                                                                                                                                                         | 0.4 (0.0, 0.8)    | 16.8 (16.0, 17.6) | 89.0 (88.0, 90.0) | 0.196 (0.191, 0.202) |
| eGFRcr (AS) ( <i>new</i> )                                                                                                                                                                                                                                                                                                                                                                                                                                             | -3.1 (-3.5, -2.6) | 17.5 (16.7, 18.1) | 86.6 (85.5, 87.6) | 0.201 (0.196, 0.206) |
| eGFRcys (AS) ( <i>current</i> )                                                                                                                                                                                                                                                                                                                                                                                                                                        | 0.6 (0.1, 1.0)    | 18.0 (17.3, 18.7) | 88.2 (87.2, 89.2) | 0.209 (0.203, 0.215) |
| eGFRcr-cys (ASR) ( <i>current</i> )                                                                                                                                                                                                                                                                                                                                                                                                                                    | -0.7 (-1.1, -0.4) | 15.3 (14.7, 16.0) | 91.9 (91.1, 92.7) | 0.172 (0.167, 0.176) |
| eGFRcr-cys (ASR-NB) ( <i>new</i> )                                                                                                                                                                                                                                                                                                                                                                                                                                     | -0.2 (-0.5, 0.2)  | 15.1 (14.6, 15.7) | 92.2 (91.4, 93.0) | 0.173 (0.168, 0.178) |
| eGFRcr-cys (AS) ( <i>new</i> )                                                                                                                                                                                                                                                                                                                                                                                                                                         | -2.5 (-2.9, -2.1) | 15.8 (15.2, 16.3) | 90.8 (89.9, 91.6) | 0.177 (0.172, 0.182) |
| <b>Black</b>                                                                                                                                                                                                                                                                                                                                                                                                                                                           |                   |                   |                   |                      |
| eGFRcr (ASR) ( <i>current</i> )                                                                                                                                                                                                                                                                                                                                                                                                                                        | -3.7 (-5.4, -1.8) | 22.8 (20.0, 24.7) | 85.1 (82.2, 87.9) | 0.205 (0.194, 0.217) |
| eGFRcr (ASR-NB) ( <i>new</i> )                                                                                                                                                                                                                                                                                                                                                                                                                                         | 7.1 (5.9, 8.8)    | 21.4 (18.1, 23.3) | 86.4 (83.4, 89.1) | 0.232 (0.218, 0.246) |
| eGFRcr (AS) ( <i>new</i> )                                                                                                                                                                                                                                                                                                                                                                                                                                             | 3.6 (1.8, 5.5)    | 21.6 (18.3, 23.6) | 87.2 (84.5, 90.0) | 0.211 (0.199, 0.224) |
| eGFRcys (AS) ( <i>current</i> )                                                                                                                                                                                                                                                                                                                                                                                                                                        | -0.1 (-1.5, 1.6)  | 22.8 (20.9, 24.7) | 84.6 (81.7, 87.6) | 0.225 (0.209, 0.241) |
| eGFRcr-cys (ASR) ( <i>current</i> )                                                                                                                                                                                                                                                                                                                                                                                                                                    | -2.5 (-3.7, -1.2) | 20.3 (18.5, 21.9) | 88.6 (85.8, 91.2) | 0.189 (0.177, 0.200) |
| eGFRcr-cys (ASR-NB) ( <i>new</i> )                                                                                                                                                                                                                                                                                                                                                                                                                                     | 3.4 (1.5, 4.5)    | 19.7 (17.8, 21.2) | 90.8 (88.4, 93.1) | 0.195 (0.182, 0.208) |
| eGFRcr-cys (AS) ( <i>new</i> )                                                                                                                                                                                                                                                                                                                                                                                                                                         | 0.1 (-0.9, 1.6)   | 20.1 (18.5, 22.0) | 90.5 (88.1, 92.9) | 0.190 (0.178, 0.203) |
| <b>Non-Black</b>                                                                                                                                                                                                                                                                                                                                                                                                                                                       |                   |                   |                   |                      |
| eGFRcr (ASR) ( <i>current</i> )                                                                                                                                                                                                                                                                                                                                                                                                                                        | -0.5 (-0.9, 0.0)  | 16.1 (15.5, 16.8) | 89.5 (88.5, 90.4) | 0.190 (0.184, 0.195) |
| eGFRcr (ASR-NB) ( <i>new</i> )                                                                                                                                                                                                                                                                                                                                                                                                                                         | -0.5 (-0.9, 0.0)  | 16.1 (15.5, 16.8) | 89.5 (88.5, 90.4) | 0.190 (0.184, 0.195) |
| eGFRcr (AS) ( <i>new</i> )                                                                                                                                                                                                                                                                                                                                                                                                                                             | -3.9 (-4.4, -3.4) | 16.7 (16.0, 17.4) | 86.5 (85.4, 87.6) | 0.199 (0.194, 0.205) |
| eGFRcys (AS) ( <i>current</i> )                                                                                                                                                                                                                                                                                                                                                                                                                                        | 0.7 (0.2, 1.2)    | 17.2 (16.5, 18.0) | 88.9 (87.9, 89.9) | 0.206 (0.200, 0.214) |
| eGFRcr-cys (ASR) ( <i>current</i> )                                                                                                                                                                                                                                                                                                                                                                                                                                    | -0.6 (-0.9, -0.2) | 14.5 (13.9, 15.2) | 92.4 (91.5, 93.2) | 0.169 (0.163, 0.174) |
| eGFRcr-cys (ASR-NB) ( <i>new</i> )                                                                                                                                                                                                                                                                                                                                                                                                                                     | -0.6 (-0.9, -0.2) | 14.5 (13.9, 15.2) | 92.4 (91.5, 93.2) | 0.169 (0.163, 0.174) |
| eGFRcr-cys (AS) ( <i>new</i> )                                                                                                                                                                                                                                                                                                                                                                                                                                         | -2.9 (-3.3, -2.5) | 15.4 (14.7, 16.0) | 90.8 (89.9, 91.8) | 0.174 (0.169, 0.180) |
| Abbreviations: eGFRcr, estimated glomerular filtration rate creatinine equation; eGFRcys, estimated glomerular filtration rate cystatin C equation; eGFRcr-cys, estimated glomerular filtration rate creatinine equation; A, age; S, sex; R, race; Non-Black (NB) refers to equations in which Black race is removed; IQR, interquartile range                                                                                                                         |                   |                   |                   |                      |
| Bias is computed as the median of the difference between measured and estimated GFR. IQR, interquartile range, is computed as the difference between the 25th and 75th percentiles. Units for bias and IQR are ml/min per 1.73 m <sup>2</sup> . P <sub>30</sub> is a measure of accuracy and is computed as percent (%) of estimates within than 30% of the measured GFR; RMSE, root mean square error, is a second measure of accuracy and computed on the log scale. |                   |                   |                   |                      |

b. Performance in 2021 Validation Dataset for equations adjusting for possible variation in GFR measurement methods

| Equation                            | Bias              | IQR               | P <sub>30</sub>   | RMSE                 |
|-------------------------------------|-------------------|-------------------|-------------------|----------------------|
| <b>Overall</b>                      |                   |                   |                   |                      |
| eGFRcr (ASR) ( <i>current</i> )     | 2.2 (1.7, 2.7)    | 17.3 (16.6, 18.0) | 90.2 (89.3, 91.0) | 0.193 (0.188, 0.199) |
| eGFRcr (ASR-NB) ( <i>new</i> )      | 3.3 (2.9, 3.7)    | 17.3 (16.6, 17.9) | 89.7 (88.7, 90.6) | 0.202 (0.197, 0.208) |
| eGFRcr (AS) ( <i>new</i> )          | -0.1 (-0.5, 0.2)  | 17.6 (16.9, 18.3) | 88.5 (87.5, 89.5) | 0.196 (0.191, 0.202) |
| eGFRcys (AS) ( <i>current</i> )     | 3.6 (3.1, 4.2)    | 18.2 (17.5, 18.8) | 87.6 (86.6, 88.6) | 0.219 (0.213, 0.226) |
| eGFRcr-cys (ASR) ( <i>current</i> ) | 1.9 (1.6, 2.3)    | 15.1 (14.5, 15.7) | 93.1 (92.4, 93.9) | 0.175 (0.170, 0.180) |
| eGFRcr-cys (ASR-NB) ( <i>new</i> )  | 2.5 (2.1, 2.9)    | 15.3 (14.6, 15.9) | 92.9 (92.1, 93.7) | 0.179 (0.174, 0.184) |
| eGFRcr-cys (AS) ( <i>new</i> )      | 0.0 (-0.3, 0.4)   | 15.4 (14.7, 16.1) | 92.5 (91.7, 93.3) | 0.175 (0.170, 0.180) |
| <b>Black</b>                        |                   |                   |                   |                      |
| eGFRcr (ASR) ( <i>current</i> )     | 0.2 (-1.5, 2.1)   | 22.7 (19.8, 25.0) | 86.2 (83.2, 88.9) | 0.202 (0.190, 0.214) |
| eGFRcr (ASR-NB) ( <i>new</i> )      | 10.6 (9.2, 12.2)  | 22.5 (19.5, 24.5) | 82.9 (79.6, 86.0) | 0.257 (0.243, 0.272) |
| eGFRcr (AS) ( <i>new</i> )          | 6.8 (5.7, 8.8)    | 21.9 (19.3, 24.9) | 85.8 (82.7, 88.6) | 0.229 (0.215, 0.243) |
| eGFRcys (AS) ( <i>current</i> )     | 3.7 (2.0, 5.3)    | 22.8 (20.8, 24.5) | 83.4 (80.3, 86.4) | 0.236 (0.219, 0.253) |
| eGFRcr-cys (ASR) ( <i>current</i> ) | 0.9 (-0.6, 2.6)   | 20.8 (18.8, 22.5) | 90.7 (88.3, 92.9) | 0.189 (0.177, 0.202) |
| eGFRcr-cys (ASR-NB) ( <i>new</i> )  | 7.0 (5.3, 8.6)    | 20.2 (18.3, 22.1) | 89.3 (86.7, 91.9) | 0.213 (0.200, 0.228) |
| eGFRcr-cys (AS) ( <i>new</i> )      | 4.1 (2.3, 5.5)    | 21.0 (18.9, 22.6) | 91.0 (88.6, 93.4) | 0.200 (0.187, 0.214) |
| <b>Non-Black</b>                    |                   |                   |                   |                      |
| eGFRcr (ASR) ( <i>current</i> )     | 2.5 (2.0, 2.8)    | 16.7 (15.9, 17.4) | 90.8 (89.9, 91.8) | 0.192 (0.186, 0.197) |
| eGFRcr (ASR-NB) ( <i>new</i> )      | 2.5 (2.0, 2.8)    | 16.7 (15.9, 17.4) | 90.8 (89.9, 91.8) | 0.192 (0.186, 0.197) |
| eGFRcr (AS) ( <i>new</i> )          | -1.0 (-1.5, -0.5) | 16.8 (16.1, 17.6) | 89.0 (88.0, 90.1) | 0.190 (0.185, 0.196) |
| eGFRcys (AS) ( <i>current</i> )     | 3.6 (3.1, 4.2)    | 17.5 (16.7, 18.2) | 88.3 (87.2, 89.3) | 0.216 (0.209, 0.223) |
| eGFRcr-cys (ASR) ( <i>current</i> ) | 2.0 (1.7, 2.4)    | 14.3 (13.8, 15.0) | 93.5 (92.7, 94.3) | 0.172 (0.167, 0.178) |
| eGFRcr-cys (ASR-NB) ( <i>new</i> )  | 2.0 (1.7, 2.4)    | 14.3 (13.8, 15.0) | 93.5 (92.7, 94.3) | 0.172 (0.167, 0.178) |
| eGFRcr-cys (AS) ( <i>new</i> )      | -0.3 (-0.7, 0.0)  | 14.8 (14.1, 15.4) | 92.8 (91.9, 93.6) | 0.170 (0.165, 0.176) |

Abbreviations: eGFRcr, estimated glomerular filtration rate creatinine equation; eGFRcys, estimated glomerular filtration rate cystatin C equation; eGFRcr-cys, estimated glomerular filtration rate creatinine equation; A, age; S, sex; R, race; Non-Black (NB) refers to equations in which Black race is removed; IQR, interquartile range

Bias is computed as the median of the difference between measured and estimated GFR. IQR, interquartile range, is computed as the difference between the 25th and 75th percentiles. Units for bias and IQR are ml/min per 1.73 m<sup>2</sup>. P<sub>30</sub> is a measure of accuracy and is computed as percent (%) of estimates within than 30% of the measured GFR; RMSE, root mean square error, is a second measure of accuracy and computed on the log scale.

In this table, we are using measured GFR values calibrated to urinary clearance of iothalamate, the method used in the development datasets. Please see Supplement Page 10 for details.

c. Performance in 2021 Validation Dataset for equations weighted for proportion of Black individuals in the development dataset

| Equation                       | Bias              | IQR               | P <sub>30</sub>   | RMSE                 |
|--------------------------------|-------------------|-------------------|-------------------|----------------------|
| <b>Overall</b>                 |                   |                   |                   |                      |
| eGFRcr (AS) ( <i>new</i> )     | -3.1 (-3.5, -2.6) | 17.5 (16.7, 18.1) | 86.6 (85.5, 87.6) | 0.201 (0.196, 0.206) |
| <b>Weighted</b>                |                   |                   |                   |                      |
| eGFRcr (AS-0%)                 | -0.9 (-1.3, -0.4) | 16.5 (15.8, 17.2) | 88.8 (87.7, 89.8) | 0.193 (0.187, 0.199) |
| eGFRcr (AS-13%)                | -1.4 (-1.9, -1.0) | 17.3 (16.5, 18.0) | 87.6 (86.5, 88.6) | 0.198 (0.193, 0.203) |
| eGFRcr (AS-50%)                | -2.1 (-2.8, -1.2) | 19.2 (17.9, 20.1) | 85.8 (84.3, 87.4) | 0.205 (0.198, 0.212) |
| eGFRcr (AS-100%)               | -0.2 (-2.2, 1.0)  | 20.5 (18.1, 22.8) | 87.2 (84.4, 90.0) | 0.195 (0.183, 0.206) |
| eGFRcr-cys (AS) ( <i>new</i> ) | -2.5 (-2.9, -2.1) | 15.8 (15.2, 16.3) | 90.8 (89.9, 91.6) | 0.177 (0.172, 0.182) |
| <b>Weighted</b>                |                   |                   |                   |                      |
| eGFRcr-cys (AS-0%)             | -1.8 (-2.3, -1.3) | 15.8 (15.1, 16.3) | 90.8 (89.9, 91.8) | 0.175 (0.170, 0.180) |
| eGFRcr-cys (AS-13%)            | -2.0 (-2.4, -1.6) | 16.0 (15.4, 16.6) | 90.2 (89.3, 91.1) | 0.178 (0.173, 0.183) |
| eGFRcr-cys (AS-50%)            | -1.6 (-2.3, -0.9) | 17.3 (16.2, 18.4) | 90.7 (89.4, 92.0) | 0.181 (0.174, 0.188) |
| eGFRcr-cys (AS-100%)           | 1.1 (-0.1, 2.4)   | 19.2 (17.2, 21.2) | 91.5 (89.1, 93.7) | 0.186 (0.174, 0.198) |
| <b>Black</b>                   |                   |                   |                   |                      |
| eGFRcr (AS) ( <i>new</i> )     | 3.6 (1.8, 5.5)    | 21.6 (18.3, 23.6) | 87.2 (84.5, 90.0) | 0.211 (0.199, 0.224) |
| <b>Weighted</b>                |                   |                   |                   |                      |
| eGFRcr (AS-0%)                 | 6.9 (5.6, 8.7)    | 21.4 (18.2, 23.5) | 86.0 (82.9, 88.9) | 0.233 (0.220, 0.247) |
| eGFRcr (AS-13%)                | 5.5 (4.0, 7.4)    | 21.7 (18.3, 23.6) | 86.4 (83.4, 89.1) | 0.222 (0.209, 0.236) |
| eGFRcr (AS-50%)                | 2.1 (0.2, 3.9)    | 21.1 (18.3, 23.6) | 87.0 (84.3, 89.6) | 0.204 (0.192, 0.216) |
| eGFRcr (AS-100%)               | -0.2 (-2.1, 1.0)  | 20.5 (18.2, 23.0) | 87.2 (84.5, 89.8) | 0.195 (0.183, 0.206) |
| eGFRcr-cys (AS) ( <i>new</i> ) | 0.1 (-0.9, 1.6)   | 20.1 (18.5, 22.0) | 90.5 (88.1, 92.9) | 0.190 (0.178, 0.203) |
| <b>Weighted</b>                |                   |                   |                   |                      |
| eGFRcr-cys (AS-0%)             | 1.7 (0.3, 3.0)    | 20.6 (18.8, 22.1) | 89.3 (86.7, 91.7) | 0.197 (0.184, 0.211) |
| eGFRcr-cys (AS-13%)            | 0.9 (-0.4, 2.1)   | 20.5 (18.8, 22.3) | 89.1 (86.5, 91.5) | 0.195 (0.182, 0.208) |
| eGFRcr-cys (AS-50%)            | 0.1 (-1.0, 1.5)   | 20.0 (18.3, 21.8) | 90.5 (88.1, 92.9) | 0.188 (0.176, 0.200) |
| eGFRcr-cys (AS-100%)           | 1.1 (-0.1, 2.5)   | 19.2 (17.3, 21.4) | 91.5 (89.3, 93.8) | 0.186 (0.174, 0.198) |
| <b>Non-Black</b>               |                   |                   |                   |                      |
| eGFRcr (AS) ( <i>new</i> )     | -3.9 (-4.4, -3.4) | 16.7 (16.0, 17.4) | 86.5 (85.4, 87.6) | 0.199 (0.194, 0.205) |
| <b>Weighted</b>                |                   |                   |                   |                      |
| eGFRcr (AS-0%)                 | -0.9 (-1.3, -0.4) | 16.5 (15.8, 17.2) | 88.8 (87.8, 89.8) | 0.193 (0.187, 0.198) |
| eGFRcr (AS-13%)                | -2.3 (-2.8, -1.8) | 16.5 (15.8, 17.3) | 87.8 (86.7, 88.9) | 0.194 (0.189, 0.200) |
| eGFRcr (AS-50%)                | -5.3 (-5.8, -4.8) | 16.7 (16.1, 17.5) | 84.6 (83.4, 85.9) | 0.206 (0.200, 0.212) |
| eGFRcr (AS-100%)               | -7.8 (-8.4, -7.3) | 16.9 (16.2, 17.6) | 79.1 (77.9, 80.4) | 0.223 (0.217, 0.230) |
| eGFRcr-cys (AS) ( <i>new</i> ) | -2.9 (-3.3, -2.5) | 15.4 (14.7, 16.0) | 90.8 (89.9, 91.8) | 0.174 (0.169, 0.180) |
| <b>Weighted</b>                |                   |                   |                   |                      |
| eGFRcr-cys (AS-0%)             | -1.8 (-2.3, -1.3) | 15.8 (15.1, 16.3) | 90.8 (89.9, 91.7) | 0.175 (0.170, 0.180) |
| eGFRcr-cys (AS-13%)            | -2.3 (-2.8, -1.9) | 15.7 (15.1, 16.4) | 90.4 (89.5, 91.3) | 0.176 (0.171, 0.181) |
| eGFRcr-cys (AS-50%)            | -3.0 (-3.4, -2.6) | 15.1 (14.5, 15.7) | 91.0 (90.0, 91.9) | 0.174 (0.169, 0.179) |
| eGFRcr-cys (AS-100%)           | -2.9 (-3.3, -2.5) | 14.8 (14.0, 15.4) | 90.4 (89.4, 91.4) | 0.180 (0.174, 0.186) |

Weighted, weighted for proportion of Black population; IQR, interquartile range. Bias is computed as the median of the difference between measured and estimated GFR. IQR, interquartile range, is computed as the difference between the 25th and 75th percentiles. Units for bias and IQR are ml/min per 1.73 m<sup>2</sup>. P<sub>30</sub> is a measure of accuracy and is computed as percent (%) of estimates within than 30% of the measured GFR; RMSE, root mean square error, is a second measure of accuracy and computed on the log scale.

d. Performance in 2021 validation dataset of alternative GFR estimating equations developed by other research groups

| Equation                     | Filtration Maker | Bias              | IQR               | P <sub>30</sub>   | RMSE                 |
|------------------------------|------------------|-------------------|-------------------|-------------------|----------------------|
| <b>Overall</b>               |                  |                   |                   |                   |                      |
| FAS 2016 (AS) <sup>16</sup>  | Cr               | 2.6 (2.2, 3.1)    | 17.0 (16.2, 17.7) | 89.4 (88.4, 90.3) | 0.201 (0.196, 0.207) |
| LM 2011 (AS) <sup>17</sup>   | Cr               | 7.0 (6.4, 7.4)    | 16.8 (16.2, 17.3) | 88.3 (87.3, 89.2) | 0.220 (0.214, 0.225) |
| EKFC 2020 (AS) <sup>18</sup> | Cr               | 3.5 (3.1, 3.9)    | 16.0 (15.4, 16.6) | 90.6 (89.7, 91.5) | 0.197 (0.192, 0.202) |
| FAS 2017 (A) <sup>20</sup>   | Cys              | 2.6 (2.2, 3.0)    | 18.9 (18.1, 19.4) | 85.6 (84.5, 86.7) | 0.228 (0.221, 0.236) |
| CAPA 2014 (A) <sup>19</sup>  | Cys              | 1.9 (1.5, 2.4)    | 17.8 (17.1, 18.4) | 86.7 (85.7, 87.8) | 0.219 (0.212, 0.225) |
| FAS 2017 (AS) <sup>20</sup>  | Cr-Cys           | 3.0 (2.4, 3.4)    | 16.1 (15.6, 16.6) | 91.6 (90.7, 92.5) | 0.190 (0.184, 0.196) |
| Avg of LMR CAPA 2011 (AS)    | Cr-Cys           | 4.0 (3.6, 4.4)    | 15.0 (14.4, 15.7) | 92.8 (91.9, 93.6) | 0.187 (0.182, 0.192) |
| <b>Black</b>                 |                  |                   |                   |                   |                      |
| FAS 2016 (AS) <sup>16</sup>  | Cr               | 8.3 (6.6, 9.6)    | 19.2 (17.0, 21.8) | 86.5 (83.8, 89.3) | 0.222 (0.209, 0.234) |
| LM 2011 (AS) <sup>17</sup>   | Cr               | 13.4 (12.3, 14.8) | 20.6 (18.6, 22.4) | 79.8 (76.3, 83.1) | 0.276 (0.262, 0.290) |
| EKFC 2020 (AS) <sup>18</sup> | Cr               | 9.2 (7.7, 10.8)   | 19.7 (17.6, 22.0) | 85.7 (82.7, 88.4) | 0.232 (0.220, 0.245) |
| FAS 2017 (A) <sup>20</sup>   | Cys              | 3.3 (2.2, 5.1)    | 22.6 (19.9, 24.7) | 85.0 (82.0, 87.8) | 0.227 (0.212, 0.242) |
| CAPA 2014 (A) <sup>19</sup>  | Cys              | 3.4 (2.2, 5.2)    | 24.2 (21.4, 25.9) | 81.7 (78.4, 84.8) | 0.244 (0.228, 0.260) |
| FAS 2017 (AS) <sup>20</sup>  | Cr-Cys           | 6.7 (5.3, 7.9)    | 19.1 (16.9, 20.8) | 90.8 (88.4, 93.1) | 0.199 (0.188, 0.210) |
| Avg of LMR CAPA 2011 (AS)    | Cr-Cys           | 8.4 (7.0, 10.2)   | 20.1 (18.1, 22.1) | 88.6 (86.0, 91.0) | 0.222 (0.210, 0.235) |
| <b>Non-Black</b>             |                  |                   |                   |                   |                      |
| FAS 2016 (AS) <sup>16</sup>  | Cr               | 1.8 (1.5, 2.2)    | 16.5 (15.8, 17.2) | 89.8 (88.9, 90.8) | 0.198 (0.191, 0.204) |
| LM 2011 (AS) <sup>17</sup>   | Cr               | 5.8 (5.4, 6.3)    | 15.8 (15.2, 16.6) | 89.7 (88.6, 90.7) | 0.209 (0.203, 0.215) |
| EKFC 2020 (AS) <sup>18</sup> | Cr               | 2.8 (2.4, 3.2)    | 15.5 (14.7, 16.2) | 91.4 (90.5, 92.3) | 0.190 (0.184, 0.196) |
| FAS 2017 (A) <sup>20</sup>   | Cys              | 2.5 (1.9, 3.0)    | 18.5 (17.6, 19.2) | 85.7 (84.6, 86.9) | 0.229 (0.220, 0.237) |
| CAPA 2014 (A) <sup>19</sup>  | Cys              | 1.7 (1.3, 2.1)    | 17.0 (16.2, 17.8) | 87.6 (86.5, 88.6) | 0.214 (0.208, 0.222) |
| FAS 2017 (AS) <sup>20</sup>  | Cr-Cys           | 2.4 (1.9, 2.9)    | 15.6 (15.0, 16.2) | 91.7 (90.8, 92.7) | 0.188 (0.181, 0.195) |
| Avg of LMR CAPA 2011 (AS)    | Cr-Cys           | 3.5 (3.1, 3.9)    | 14.2 (13.4, 14.8) | 93.5 (92.7, 94.3) | 0.180 (0.175, 0.186) |

mGFR, measured glomerular filtration rate (ml/min/1.73m<sup>2</sup>); LM, Lund-Malmo; CAPA, Caucasian and Asian Pediatric and Adult; FAS, Full-Age Spectrum; EKFC, European Kidney Function Consortium; Avg of LMR, is the average between Lund-Malmo and Caucasian and Asian Pediatric and Adult equations; Cr, creatinine, Cys, cystatin C, A, age; S, sex; R, race; IQR, interquartile range.

Bias is computed as the median of the difference between measured and estimated GFR. IQR, interquartile range, is computed as the difference between the 25th and 75th percentiles. Units for bias and IQR are ml/min per 1.73 m<sup>2</sup>. P<sub>30</sub> is a measure of accuracy and is computed as percent (%) of estimates within than 30% of the measured GFR; RMSE, root mean square error, is a second measure of accuracy and computed on the log scale.

e. Performance in 2009 external validation dataset of current vs new creatinine equations

| Equation                                                                                                                                                                                                                                                                                                                                                                                                                                                               | Bias             | IQR               | P <sub>30</sub>   | RMSE                 |
|------------------------------------------------------------------------------------------------------------------------------------------------------------------------------------------------------------------------------------------------------------------------------------------------------------------------------------------------------------------------------------------------------------------------------------------------------------------------|------------------|-------------------|-------------------|----------------------|
| Overall                                                                                                                                                                                                                                                                                                                                                                                                                                                                |                  |                   |                   |                      |
| eGFRcr (ASR) ( <i>current</i> )                                                                                                                                                                                                                                                                                                                                                                                                                                        | 2.6 (2.2, 3.0)   | 17.1 (16.4, 17.9) | 84.0 (82.9, 85.2) | 0.251 (0.242, 0.261) |
| eGFRcr (ASR-NB) ( <i>new</i> )                                                                                                                                                                                                                                                                                                                                                                                                                                         | 3.2 (2.7, 3.8)   | 17.2 (16.4, 17.9) | 83.6 (82.6, 84.8) | 0.254 (0.245, 0.263) |
| eGFRcr (AS) ( <i>new</i> )                                                                                                                                                                                                                                                                                                                                                                                                                                             | 0.9 (0.4, 1.3)   | 17.2 (16.4, 18.0) | 83.5 (82.3, 84.6) | 0.249 (0.240, 0.259) |
| Black                                                                                                                                                                                                                                                                                                                                                                                                                                                                  |                  |                   |                   |                      |
| eGFRcr (ASR) ( <i>current</i> )                                                                                                                                                                                                                                                                                                                                                                                                                                        | -0.8 (-2.0, 0.7) | 15.8 (12.9, 18.5) | 81.2 (77.2, 85.2) | 0.245 (0.222, 0.267) |
| eGFRcr (ASR-NB) ( <i>new</i> )                                                                                                                                                                                                                                                                                                                                                                                                                                         | 5.3 (4.6, 7.0)   | 16.4 (14.0, 18.6) | 77.2 (72.8, 81.5) | 0.273 (0.253, 0.293) |
| eGFRcr (AS) ( <i>new</i> )                                                                                                                                                                                                                                                                                                                                                                                                                                             | 3.3 (2.2, 4.7)   | 16.1 (13.8, 18.1) | 80.9 (76.9, 84.9) | 0.252 (0.231, 0.272) |
| Non-Black                                                                                                                                                                                                                                                                                                                                                                                                                                                              |                  |                   |                   |                      |
| eGFRcr (ASR) ( <i>current</i> )                                                                                                                                                                                                                                                                                                                                                                                                                                        | 2.9 (2.4, 3.4)   | 17.3 (16.5, 18.0) | 84.3 (83.1, 85.6) | 0.252 (0.242, 0.262) |
| eGFRcr (ASR-NB) ( <i>new</i> )                                                                                                                                                                                                                                                                                                                                                                                                                                         | 2.9 (2.4, 3.4)   | 17.3 (16.5, 18.0) | 84.3 (83.1, 85.6) | 0.252 (0.242, 0.262) |
| eGFRcr (AS) ( <i>new</i> )                                                                                                                                                                                                                                                                                                                                                                                                                                             | 0.5 (0.1, 1.0)   | 17.4 (16.5, 18.1) | 83.8 (82.5, 85.0) | 0.249 (0.239, 0.260) |
| Abbreviations: eGFRcr, estimated glomerular filtration rate creatinine equation; A, age; S, sex; R, race; Non-Black (NB) refers to equations in which Black race is removed; IQR, interquartile range                                                                                                                                                                                                                                                                  |                  |                   |                   |                      |
| Bias is computed as the median of the difference between measured and estimated GFR. IQR, interquartile range, is computed as the difference between the 25th and 75th percentiles. Units for bias and IQR are ml/min per 1.73 m <sup>2</sup> . P <sub>30</sub> is a measure of accuracy and is computed as percent (%) of estimates within than 30% of the measured GFR; RMSE, root mean square error, is a second measure of accuracy and computed on the log scale. |                  |                   |                   |                      |

f. Performance in 2012 external validation dataset of current vs new creatinine, cystatin and creatinine-cystatin C equations

| Equation                            | Bias             | IQR               | P <sub>30</sub>    | RMSE                 |
|-------------------------------------|------------------|-------------------|--------------------|----------------------|
| <b>Overall</b>                      |                  |                   |                    |                      |
| eGFRcr (ASR) ( <i>current</i> )     | 3.9 (3.1, 4.7)   | 15.4 (14.3, 16.5) | 87.3 (85.3, 89.2)  | 0.224 (0.213, 0.235) |
| eGFRcr (ASR-NB) ( <i>new</i> )      | 4.1 (3.3, 5.1)   | 15.5 (14.4, 16.7) | 87.2 (85.3, 89.2)  | 0.226 (0.215, 0.237) |
| eGFRcr (AS) ( <i>new</i> )          | 2.0 (1.3, 2.8)   | 15.3 (14.3, 16.3) | 87.5 (85.5, 89.5)  | 0.217 (0.205, 0.230) |
| eGFRcys (AS) ( <i>current</i> )     | 3.3 (2.3, 4.4)   | 16.4 (14.8, 17.7) | 85.8 (83.7, 87.8)  | 0.234 (0.219, 0.250) |
| eGFRcr-cys (ASR) ( <i>current</i> ) | 3.8 (3.1, 4.5)   | 13.4 (12.3, 14.4) | 91.5 (89.8, 93.0)  | 0.189 (0.178, 0.201) |
| eGFRcr-cys (ASR-NB) ( <i>new</i> )  | 3.9 (3.3, 4.6)   | 13.5 (12.4, 14.4) | 91.6 (89.9, 93.2)  | 0.189 (0.178, 0.201) |
| eGFRcr-cys (AS) ( <i>new</i> )      | 2.4 (1.5, 3.2)   | 13.0 (11.9, 14.2) | 92.4 (90.8, 93.9)  | 0.183 (0.171, 0.197) |
| <b>Black</b>                        |                  |                   |                    |                      |
| eGFRcr (ASR) ( <i>current</i> )     | 3.3 (-0.7, 4.9)  | 10.2 (4.8, 14.5)  | 90.0 (76.7, 100.0) | 0.194 (0.145, 0.242) |
| eGFRcr (ASR-NB) ( <i>new</i> )      | 8.1 (6.2, 11.3)  | 11.8 (5.0, 17.9)  | 86.7 (73.3, 96.7)  | 0.266 (0.210, 0.325) |
| eGFRcr (AS) ( <i>new</i> )          | 6.4 (3.4, 9.3)   | 10.6 (5.7, 16.2)  | 83.3 (70.0, 96.7)  | 0.228 (0.176, 0.279) |
| eGFRcys (AS) ( <i>current</i> )     | -3.2 (-7.1, 0.2) | 9.9 (6.2, 21.8)   | 76.7 (60.0, 90.0)  | 0.259 (0.182, 0.332) |
| eGFRcr-cys (ASR) ( <i>current</i> ) | -0.9 (-3.3, 2.4) | 9.4 (5.4, 16.8)   | 86.7 (73.3, 96.7)  | 0.187 (0.135, 0.242) |
| eGFRcr-cys (ASR-NB) ( <i>new</i> )  | 2.6 (0.6, 5.8)   | 10.2 (5.3, 17.4)  | 90.0 (80.0, 100.0) | 0.189 (0.142, 0.234) |
| eGFRcr-cys (AS) ( <i>new</i> )      | 0.5 (-2.0, 4.4)  | 8.7 (5.3, 18.2)   | 96.7 (90.0, 100.0) | 0.186 (0.139, 0.236) |
| <b>Non-Black</b>                    |                  |                   |                    |                      |
| eGFRcr (ASR) ( <i>current</i> )     | 3.9 (3.1, 4.9)   | 15.6 (14.5, 16.8) | 87.2 (85.3, 89.2)  | 0.225 (0.213, 0.236) |
| eGFRcr (ASR-NB) ( <i>new</i> )      | 3.9 (3.1, 4.9)   | 15.6 (14.5, 16.8) | 87.2 (85.3, 89.2)  | 0.225 (0.213, 0.236) |
| eGFRcr (AS) ( <i>new</i> )          | 1.8 (1.1, 2.6)   | 15.4 (14.4, 16.3) | 87.6 (85.7, 89.4)  | 0.217 (0.204, 0.230) |
| eGFRcys (AS) ( <i>current</i> )     | 3.5 (2.6, 4.7)   | 16.4 (14.9, 17.7) | 86.0 (83.9, 88.0)  | 0.233 (0.218, 0.249) |
| eGFRcr-cys (ASR) ( <i>current</i> ) | 4.0 (3.3, 4.8)   | 13.5 (12.5, 14.4) | 91.6 (89.9, 93.3)  | 0.189 (0.178, 0.201) |
| eGFRcr-cys (ASR-NB) ( <i>new</i> )  | 4.0 (3.3, 4.8)   | 13.5 (12.5, 14.4) | 91.6 (89.9, 93.3)  | 0.189 (0.178, 0.201) |
| eGFRcr-cys (AS) ( <i>new</i> )      | 2.4 (1.5, 3.2)   | 13.0 (12.0, 14.2) | 92.3 (90.7, 93.9)  | 0.183 (0.171, 0.196) |

Abbreviations: eGFRcr, estimated glomerular filtration rate creatinine equation; eGFRcys, estimated glomerular filtration rate cystatin C equation; eGFRcr-cys, estimated glomerular filtration rate creatinine equation; A, age; S, sex; R, race; Non-Black (NB) refers to equations in which Black race is removed; IQR, interquartile range

Bias is computed as the median of the difference between measured and estimated GFR. IQR, interquartile range, is computed as the difference between the 25<sup>th</sup> and 75<sup>th</sup> percentiles. Units for bias and IQR are ml/min per 1.73 m<sup>2</sup>. P<sub>30</sub> is a measure of accuracy and is computed as percent (%) of estimates within than 30% of the measured GFR; RMSE, root mean square error, is a second measure of accuracy and computed on the log scale.

**Table S14:** Agreement and disagreement between mGFR and eGFR categories

| Equation                            | Black Individuals |                                |                                 | Non-Black Individuals |                               |                                |
|-------------------------------------|-------------------|--------------------------------|---------------------------------|-----------------------|-------------------------------|--------------------------------|
|                                     | Agreement, % (CI) | eGFR too high (upward), % (CI) | eGFR too low (downward), % (CI) | Agreement, % (CI)     | eGFR too high (upward) % (CI) | eGFR too low (downward) % (CI) |
| eGFRcr (ASR) ( <i>current</i> )     | 63.2 (59.3, 67.1) | 14.9 (12.0, 17.7)              | 21.9 (18.6, 25.3)               | 68.5 (67.0, 70.1)     | 14.0 (12.8, 15.2)             | 17.5 (16.2, 18.7)              |
| eGFRcr (ASR-NB) ( <i>new</i> )      | 59.2 (55.2, 63.2) | 33.5 (29.7, 37.4)              | 7.3 (5.1, 9.4)                  | 68.5 (67.0, 70.1)     | 14.0 (12.8, 15.2)             | 17.5 (16.2, 18.7)              |
| eGFRcr (AS) ( <i>new</i> )          | 61.8 (57.9, 65.8) | 27.3 (23.7, 30.9)              | 10.9 (8.3, 13.4)                | 66.7 (65.1, 68.2)     | 9.0 (8.0, 9.9)                | 24.3 (22.9, 25.8)              |
| eGFRcys (AS) ( <i>current</i> )     | 62.5 (58.6, 66.5) | 21.4 (18.1, 24.8)              | 16.1 (13.1, 19.1)               | 66.1 (64.5, 67.7)     | 19.3 (18.0, 20.6)             | 14.6 (13.5, 15.8)              |
| eGFRcr-cys (ASR) ( <i>current</i> ) | 67.9 (64.1, 71.7) | 13.6 (10.8, 16.4)              | 18.5 (15.3, 21.6)               | 70.8 (69.3, 72.4)     | 13.4 (12.3, 14.5)             | 15.8 (14.5, 17.0)              |
| eGFRcr-cys (ASR-NB) ( <i>new</i> )  | 66.5 (62.6, 70.3) | 22.6 (19.2, 26.0)              | 10.9 (8.3, 13.4)                | 70.8 (69.3, 72.4)     | 13.4 (12.3, 14.5)             | 15.8 (14.5, 17.0)              |
| eGFRcr-cys (AS) ( <i>new</i> )      | 68.4 (64.6, 72.2) | 16.6 (13.6, 19.6)              | 15.0 (12.1, 17.9)               | 70.2 (68.6, 71.7)     | 10.1 (9.1, 11.1)              | 19.7 (18.4, 21.0)              |

Shown is agreement was ascertained between measured GFR and estimated GFR using guideline recommended CKD GFR (G) stages < 30, 30-44, 45-59, 60-89 and > 90 ml/min/1.73m<sup>2</sup>.

Abbreviations: mGFR, measured GFR; eGFRcr, estimated glomerular filtration rate creatinine equation; eGFRcys, estimated glomerular filtration rate cystatin C equation; eGFRcr-cys, estimated glomerular filtration rate creatinine equation; A, age; S, sex; R, race; NB, Non-Black; CI, confidence interval

**Table S15:** Prevalence of total CKD and CKD stages, defined with eGFR and persistent ACR, overall and stratified by race groups

|                                   | Overall      |                        |                     | Non-Black    |                        |                     | Black        |                        |                     |
|-----------------------------------|--------------|------------------------|---------------------|--------------|------------------------|---------------------|--------------|------------------------|---------------------|
|                                   | Unweighted N | Weighted N**, millions | Prevalence, % (SE)* | Unweighted N | Weighted N**, millions | Prevalence, % (SE)* | Unweighted N | Weighted N**, millions | Prevalence, % (SE)* |
| <b>eGFRcr (ASR) (current)</b>     | 1179         | 29.6                   | 12.0 (0.6)          | 948          | 25.2                   | 11.7 (0.9)          | 231          | 4.6                    | 14.3 (1.1)          |
| Stage 1                           | 111          | 7.3                    | 3.0 (0.4)           | 84           | 5.8                    | 2.7 (0.7)           | 27           | 1.6                    | 4.9 (0.9)           |
| Stage 2                           | 254          | 5.4                    | 2.2 (0.2)           | 200          | 4.6                    | 2.1 (0.4)           | 54           | 0.9                    | 2.9 (0.5)           |
| Stage 3a                          | 526          | 11.1                   | 4.5 (0.3)           | 439          | 9.8                    | 4.6 (0.4)           | 87           | 1.2                    | 3.7 (0.4)           |
| Stage 3b                          | 200          | 4.3                    | 1.7 (0.1)           | 166          | 3.8                    | 1.8 (0.2)           | 34           | 0.4                    | 1.4 (0.3)           |
| Stage 4                           | 88           | 1.5                    | 0.6 (0.1)           | 59           | 1.1                    | 0.5 (0.1)           | 29           | 0.4                    | 1.4 (0.3)           |
| <b>eGFRcr (ASR-NB) (new)</b>      | 1251         | 30.5                   | 12.4 (0.6)          | 948          | 25.2                   | 11.7 (0.9)          | 303          | 5.6                    | 17.8 (1.3)          |
| Stage 1                           | 101          | 7.0                    | 2.8 (0.4)           | 84           | 5.8                    | 2.7 (0.7)           | 17           | 1.2                    | 3.8 (0.7)           |
| Stage 2                           | 245          | 5.6                    | 2.3 (0.2)           | 200          | 4.6                    | 2.1 (0.4)           | 45           | 1.1                    | 3.6 (0.7)           |
| Stage 3a                          | 581          | 11.7                   | 4.8 (0.3)           | 439          | 9.8                    | 4.6 (0.4)           | 142          | 2.0                    | 6.2 (0.6)           |
| Stage 3b                          | 226          | 4.5                    | 1.8 (0.1)           | 166          | 3.8                    | 1.8 (0.2)           | 60           | 0.8                    | 2.4 (0.3)           |
| Stage 4                           | 98           | 1.6                    | 0.7 (0.1)           | 59           | 1.1                    | 0.5 (0.1)           | 39           | 0.6                    | 1.8 (0.3)           |
| <b>eGFRcr (AS) (new)</b>          | 1089         | 26.9                   | 10.9 (0.6)          | 823          | 22.0                   | 10.2 (1.0)          | 266          | 5.2                    | 16.3 (1.2)          |
| Stage 1                           | 135          | 7.8                    | 3.2 (0.4)           | 114          | 6.6                    | 3.1 (0.8)           | 21           | 1.2                    | 3.9 (0.8)           |
| Stage 2                           | 238          | 5.2                    | 2.1 (0.2)           | 186          | 4.1                    | 1.9 (0.3)           | 52           | 1.2                    | 3.9 (0.7)           |
| Stage 3a                          | 461          | 9.0                    | 3.6 (0.3)           | 343          | 7.4                    | 3.4 (0.3)           | 118          | 1.7                    | 5.3 (0.4)           |
| Stage 3b                          | 176          | 3.7                    | 1.5 (0.1)           | 134          | 3.2                    | 1.5 (0.2)           | 42           | 0.5                    | 1.7 (0.3)           |
| Stage 4                           | 79           | 1.2                    | 0.5 (0.1)           | 46           | 0.8                    | 0.4 (0.1)           | 33           | 0.5                    | 1.5 (0.3)           |
| <b>eGFRcys (AS) (current)</b>     | 1277         | 33.0                   | 13.4 (0.7)          | 1047         | 28.6                   | 13.3 (1.0)          | 230          | 4.5                    | 14.2 (1.3)          |
| Stage 1                           | 121          | 6.6                    | 2.7 (0.4)           | 89           | 5.2                    | 2.4 (0.7)           | 32           | 1.6                    | 5.0 (1.0)           |
| Stage 2                           | 189          | 5.1                    | 2.1 (0.3)           | 148          | 4.4                    | 2.0 (0.4)           | 41           | 0.8                    | 2.4 (0.5)           |
| Stage 3a                          | 511          | 12.2                   | 4.9 (0.4)           | 428          | 11.0                   | 5.1 (0.5)           | 83           | 1.1                    | 3.5 (0.6)           |
| Stage 3b                          | 303          | 6.1                    | 2.5 (0.2)           | 268          | 5.5                    | 2.6 (0.2)           | 35           | 0.5                    | 1.5 (0.3)           |
| Stage 4                           | 153          | 3.1                    | 1.3 (0.2)           | 114          | 2.6                    | 1.2 (0.2)           | 39           | 0.6                    | 1.8 (0.3)           |
| <b>eGFRcr-cys (ASR) (current)</b> | 1174         | 29.8                   | 12.1 (0.6)          | 955          | 25.5                   | 11.9 (1.0)          | 219          | 4.3                    | 13.6 (1.2)          |
| Stage 1                           | 120          | 7.0                    | 2.8 (0.4)           | 90           | 5.5                    | 2.6 (0.7)           | 30           | 1.6                    | 5.1 (0.9)           |
| Stage 2                           | 221          | 5.3                    | 2.2 (0.3)           | 172          | 4.5                    | 2.1 (0.4)           | 49           | 0.8                    | 2.5 (0.5)           |



|                                  |             |             |                   |            |             |                   |            |            |                   |
|----------------------------------|-------------|-------------|-------------------|------------|-------------|-------------------|------------|------------|-------------------|
| Stage 3a                         | 504         | 10.9        | 4.4 (0.4)         | 427        | 9.9         | 4.6 (0.4)         | 77         | 1.0        | 3.1 (0.4)         |
| Stage 3b                         | 207         | 4.1         | 1.7 (0.2)         | 181        | 3.8         | 1.7 (0.2)         | 26         | 0.4        | 1.1 (0.2)         |
| Stage 4                          | 122         | 2.4         | 1.0 (0.1)         | 85         | 1.9         | 0.9 (0.2)         | 37         | 0.5        | 1.7 (0.3)         |
| <b>eGFRcr-cys (ASR-NB) (new)</b> | <b>1199</b> | <b>30.1</b> | <b>12.2 (0.6)</b> | <b>955</b> | <b>25.5</b> | <b>11.9 (0.9)</b> | <b>244</b> | <b>4.7</b> | <b>14.7 (1.2)</b> |
| Stage 1                          | 113         | 6.8         | 2.8 (0.4)         | 90         | 5.5         | 2.6 (0.7)         | 23         | 1.4        | 4.4 (0.9)         |
| Stage 2                          | 220         | 5.5         | 2.2 (0.3)         | 172        | 4.5         | 2.1 (0.4)         | 48         | 1.0        | 3.1 (0.6)         |
| Stage 3a                         | 520         | 11.1        | 4.5 (0.3)         | 427        | 9.9         | 4.6 (0.4)         | 93         | 1.2        | 3.7 (0.3)         |
| Stage 3b                         | 222         | 4.3         | 1.7 (0.2)         | 181        | 3.8         | 1.7 (0.2)         | 41         | 0.5        | 1.7 (0.3)         |
| Stage 4                          | 124         | 2.4         | 1.0 (0.1)         | 85         | 1.9         | 0.9 (0.2)         | 39         | 0.6        | 1.8 (0.3)         |
| <b>eGFRcr-cys (AS) (new)</b>     | <b>1107</b> | <b>28.0</b> | <b>11.4 (0.6)</b> | <b>881</b> | <b>23.7</b> | <b>11.0 (1.0)</b> | <b>227</b> | <b>4.4</b> | <b>13.9 (1.2)</b> |
| Stage 1                          | 134         | 7.6         | 3.1 (0.4)         | 108        | 6.2         | 2.9 (0.8)         | 26         | 1.5        | 4.6 (0.9)         |
| Stage 2                          | 213         | 5.0         | 2.0 (0.2)         | 162        | 4.1         | 1.9 (0.4)         | 52         | 1.0        | 3.0 (0.5)         |
| Stage 3a                         | 459         | 9.4         | 3.8 (0.3)         | 380        | 8.4         | 3.9 (0.4)         | 79         | 1.0        | 3.2 (0.4)         |
| Stage 3b                         | 183         | 3.8         | 1.5 (0.1)         | 150        | 3.3         | 1.5 (0.2)         | 33         | 0.4        | 1.4 (0.3)         |
| Stage 4                          | 118         | 2.2         | 0.9 (0.1)         | 81         | 1.7         | 0.8 (0.1)         | 37         | 0.5        | 1.7 (0.3)         |

\* SE from bootstrap

\*\* Weighted N was based on 2019 US population estimation.

CKD stage:

Stage 1: eGFR $\geq$ 90 & persistent ACR $\geq$ 30 (50.9 % of the proportion of individuals with ACR between 30-299 and eGFR  $\geq$  90, and 100% of those with ACR $\geq$ 300 and eGFR $\geq$ 90)

Stage 2: eGFR 60-89 & persistent ACR $\geq$ 30 (75.0% of the proportion of individuals with ACR between 30-299 and eGFR between 60-89, and 100% of those with ACR $\geq$ 300 and eGFR between 60-89)

Stage 3a: eGFR 45-59

Stage 3b: eGFR 30-44

Stage 4: eGFR $<$ 30

Abbreviations: eGFRcr, estimated glomerular filtration rate creatinine equation; eGFRcys, estimated glomerular filtration rate cystatin C equation; eGFRcr-cys, estimated glomerular filtration rate creatinine equation; A, age; S, sex; R, race; Non-Black (NB) refers to equations in which Black race is removed

**Table S16:** Prevalence of KDIGO GFR stages, overall and stratified by race

|                                   | Overall      |                        |                     | Non-Black    |                        |                     | Black        |                        |                     |
|-----------------------------------|--------------|------------------------|---------------------|--------------|------------------------|---------------------|--------------|------------------------|---------------------|
|                                   | Unweighted N | Weighted N**, millions | Prevalence, % (SE)* | Unweighted N | Weighted N**, millions | Prevalence, % (SE)* | Unweighted N | Weighted N**, millions | Prevalence, % (SE)* |
| <b>eGFRcr (ASR) (current)</b>     |              |                        |                     |              |                        |                     |              |                        |                     |
| ≥90 ml/min/1.73 m <sup>2</sup>    | 1673         | 144.6                  | 58.6 (1.3)          | 1313         | 122.4                  | 57.0 (1.3)          | 360          | 22.9                   | 72.2 (1.5)          |
| 60-<90 ml/min/1.73 m <sup>2</sup> | 2076         | 85.2                   | 34.5 (1.2)          | 1751         | 77.6                   | 36.1 (1.3)          | 325          | 6.8                    | 21.3 (1.3)          |
| 45-<60 ml/min/1.73 m <sup>2</sup> | 526          | 11.1                   | 4.5 (0.3)           | 439          | 9.8                    | 4.6 (0.4)           | 87           | 1.2                    | 3.7 (0.4)           |
| 30-<45 ml/min/1.73 m <sup>2</sup> | 200          | 4.3                    | 1.7 (0.1)           | 166          | 3.8                    | 1.8 (0.2)           | 34           | 0.4                    | 1.4 (0.3)           |
| <30 ml/min/1.73 m <sup>2</sup>    | 88           | 1.5                    | 0.6 (0.1)           | 59           | 1.1                    | 0.5 (0.1)           | 29           | 0.4                    | 1.4 (0.2)           |
| <b>eGFRcr (ASR-NB) (new)</b>      |              |                        |                     |              |                        |                     |              |                        |                     |
| ≥90 ml/min/1.73 m <sup>2</sup>    | 1529         | 139.3                  | 56.5 (1.3)          | 1313         | 122.4                  | 57.0 (1.3)          | 216          | 16.6                   | 52.1 (1.9)          |
| 60-<90 ml/min/1.73 m <sup>2</sup> | 2129         | 89.5                   | 36.3 (1.2)          | 1751         | 77.6                   | 36.1 (1.3)          | 378          | 11.9                   | 37.4 (1.9)          |
| 45-<60 ml/min/1.73 m <sup>2</sup> | 581          | 11.7                   | 4.8 (0.3)           | 439          | 9.8                    | 4.6 (0.4)           | 142          | 2.0                    | 6.2 (0.6)           |
| 30-<45 ml/min/1.73 m <sup>2</sup> | 226          | 4.5                    | 1.8 (0.1)           | 166          | 3.8                    | 1.8 (0.2)           | 60           | 0.8                    | 2.4 (0.3)           |
| <30 ml/min/1.73 m <sup>2</sup>    | 98           | 1.6                    | 0.7 (0.1)           | 59           | 1.1                    | 0.5 (0.1)           | 39           | 0.6                    | 1.8 (0.3)           |
| <b>eGFRcr (AS) (new)</b>          |              |                        |                     |              |                        |                     |              |                        |                     |
| ≥90 ml/min/1.73 m <sup>2</sup>    | 1903         | 156.2                  | 63.3 (1.4)          | 1638         | 137.3                  | 63.9 (1.5)          | 265          | 18.6                   | 58.5 (1.7)          |
| 60-<90 ml/min/1.73 m <sup>2</sup> | 1944         | 76.6                   | 31.0 (1.3)          | 1567         | 66.2                   | 30.8 (1.4)          | 377          | 10.5                   | 32.9 (1.7)          |
| 45-<60 ml/min/1.73 m <sup>2</sup> | 461          | 9.0                    | 3.6 (0.3)           | 343          | 7.4                    | 3.4 (0.3)           | 118          | 1.7                    | 5.3 (0.4)           |
| 30-<45 ml/min/1.73 m <sup>2</sup> | 176          | 3.7                    | 1.5 (0.1)           | 134          | 3.2                    | 1.5 (0.2)           | 42           | 0.5                    | 1.7 (0.3)           |
| <30 ml/min/1.73 m <sup>2</sup>    | 79           | 1.2                    | 0.5 (0.1)           | 46           | 0.8                    | 0.4 (0.1)           | 33           | 0.5                    | 1.5 (0.3)           |
| <b>eGFRcys (AS) (current)</b>     |              |                        |                     |              |                        |                     |              |                        |                     |
| ≥90 ml/min/1.73 m <sup>2</sup>    | 2117         | 171.7                  | 69.6 (1.4)          | 1677         | 147.8                  | 68.8 (1.5)          | 440          | 24.4                   | 76.7 (1.7)          |
| 60-<90 ml/min/1.73 m <sup>2</sup> | 1479         | 53.6                   | 21.7 (1.1)          | 1241         | 48.0                   | 22.4 (1.2)          | 238          | 5.2                    | 16.5 (1.4)          |
| 45-<60 ml/min/1.73 m <sup>2</sup> | 511          | 12.2                   | 4.9 (0.4)           | 428          | 11.0                   | 5.1 (0.5)           | 83           | 1.1                    | 3.5 (0.6)           |
| 30-<45 ml/min/1.73 m <sup>2</sup> | 303          | 6.1                    | 2.5 (0.2)           | 268          | 5.5                    | 2.6 (0.2)           | 35           | 0.5                    | 1.5 (0.3)           |
| <30 ml/min/1.73 m <sup>2</sup>    | 153          | 3.1                    | 1.3 (0.2)           | 114          | 2.6                    | 1.2 (0.2)           | 39           | 0.6                    | 1.8 (0.3)           |
| <b>eGFRcr-cys (ASR) (current)</b> |              |                        |                     |              |                        |                     |              |                        |                     |

|                                   |      |       |            |      |       |            |     |      |            |
|-----------------------------------|------|-------|------------|------|-------|------------|-----|------|------------|
| ≥90 ml/min/1.73 m <sup>2</sup>    | 2032 | 169.1 | 68.6 (1.3) | 1602 | 144.8 | 67.4 (1.4) | 430 | 24.8 | 77.9 (1.3) |
| 60-<90 ml/min/1.73 m <sup>2</sup> | 1698 | 60.1  | 24.4 (1.1) | 1433 | 54.5  | 25.4 (1.2) | 265 | 5.1  | 16.1 (0.9) |
| 45-<60 ml/min/1.73 m <sup>2</sup> | 504  | 10.9  | 4.4 (0.4)  | 427  | 9.9   | 4.6 (0.4)  | 77  | 1.0  | 3.1 (0.4)  |
| 30-<45 ml/min/1.73 m <sup>2</sup> | 207  | 4.1   | 1.7 (0.2)  | 181  | 3.8   | 1.7 (0.2)  | 26  | 0.4  | 1.1 (0.2)  |
| <30 ml/min/1.73 m <sup>2</sup>    | 122  | 2.4   | 1.0 (0.1)  | 85   | 1.9   | 0.9 (0.2)  | 37  | 0.5  | 1.7 (0.3)  |
| <b>eGFRcr-cys (ASR-NB) (new)</b>  |      |       |            |      |       |            |     |      |            |
| ≥90 ml/min/1.73 m <sup>2</sup>    | 1952 | 167.4 | 67.9 (1.3) | 1602 | 144.8 | 67.4 (1.4) | 350 | 22.7 | 71.6 (1.4) |
| 60-<90 ml/min/1.73 m <sup>2</sup> | 1745 | 61.5  | 24.9 (1.1) | 1433 | 54.5  | 25.4 (1.2) | 312 | 6.7  | 21.2 (1.2) |
| 45-<60 ml/min/1.73 m <sup>2</sup> | 520  | 11.1  | 4.5 (0.3)  | 427  | 9.9   | 4.6 (0.4)  | 93  | 1.2  | 3.7 (0.3)  |
| 30-<45 ml/min/1.73 m <sup>2</sup> | 222  | 4.3   | 1.7 (0.2)  | 181  | 3.8   | 1.7 (0.2)  | 41  | 0.5  | 1.7 (0.3)  |
| <30 ml/min/1.73 m <sup>2</sup>    | 124  | 2.4   | 1.0 (0.1)  | 85   | 1.9   | 0.9 (0.2)  | 39  | 0.6  | 1.8 (0.3)  |
| <b>eGFRcr-cys (AS) (new)</b>      |      |       |            |      |       |            |     |      |            |
| ≥90 ml/min/1.73 m <sup>2</sup>    | 2225 | 179.2 | 72.7 (1.1) | 1824 | 155.5 | 72.4 (1.2) | 401 | 23.8 | 74.8 (1.2) |
| 60-<90 ml/min/1.73 m <sup>2</sup> | 1578 | 52.0  | 21.1 (1.0) | 1293 | 45.9  | 21.4 (1.0) | 285 | 6.0  | 18.9 (1.0) |
| 45-<60 ml/min/1.73 m <sup>2</sup> | 459  | 9.4   | 3.8 (0.3)  | 380  | 8.4   | 3.9 (0.4)  | 79  | 1.0  | 3.2 (0.4)  |
| 30-<45 ml/min/1.73 m <sup>2</sup> | 183  | 3.8   | 1.5 (0.1)  | 150  | 3.3   | 1.5 (0.2)  | 33  | 0.4  | 1.4 (0.3)  |
| <30 ml/min/1.73 m <sup>2</sup>    | 118  | 2.2   | 0.9 (0.1)  | 81   | 1.7   | 0.8 (0.1)  | 37  | 0.5  | 1.7 (0.3)  |

\* SE from bootstrap

\*\* Weighted N was based on 2019 estimated population

KDIGO, Kidney Disease Improving Global Outcomes; SE, standard error

Abbreviations: eGFRcr, estimated glomerular filtration rate creatinine equation; eGFRcys, estimated glomerular filtration rate cystatin C equation; eGFRcr-cys, estimated glomerular filtration rate creatinine equation; A, age; S, sex; R, race; Non-Black (NB) refers to equations in which Black race is removed

### Supplemental References

1. Levey AS, Stevens LA, Schmid CH, et al. A New Equation to Estimate Glomerular Filtration Rate. *Ann Intern Med* 2009;150:604-12.
2. Inker LA, Schmid CH, Tighiouart H, et al. Estimating Glomerular Filtration Rate from Serum Creatinine and Cystatin C. *N Engl J Med* 2012;367:20-9.
3. Inker LA, Couture SJ, Tighiouart H, et al. A New Panel Estimated Gfr, Including Beta2-Microglobulin and Beta-Trace Protein and Not Including Race, Developed in a Diverse Population. *Am J Kidney Dis* 2020.
4. Stevens LA, Claybon MA, Schmid CH, et al. Evaluation of the Chronic Kidney Disease Epidemiology Collaboration Equation for Estimating the Glomerular Filtration Rate in Multiple Ethnicities. *Kidney Int* 2011;79:555-62.
5. Inker LA, Eckfeldt J, Levey AS, et al. Expressing the Ckd-Epi (Chronic Kidney Disease Epidemiology Collaboration) Cystatin C Equations for Estimating Gfr with Standardized Serum Cystatin C Values. *Am J Kidney Dis* 2011;58:682-4.
6. Stevens LA, Manzi J, Levey AS, et al. Impact of Creatinine Calibration on Performance of Gfr Estimating Equations in a Pooled Individual Patient Database. *Am J Kidney Dis* 2007;50:21-35.
7. Levey AS, Coresh J, Greene T, et al. Expressing the Modification of Diet in Renal Disease Study Equation for Estimating Glomerular Filtration Rate with Standardized Serum Creatinine Values. *Clin Chem* 2007;53:766-72.
8. Grubb A, Blirup-Jensen S, Lindstrom V, Schmidt C, Althaus H, Zegers I. First Certified Reference Material for Cystatin C in Human Serum Erm-Da471/Ifcc. *Clin Chem Lab Med* 2010;48:1619-21.
9. Blirup-Jensen S, Grubb A, Lindstrom V, Schmidt C, Althaus H. Standardization of Cystatin C: Development of Primary and Secondary Reference Preparations. *Scand J Clin Lab Invest Suppl* 2008;241:67-70.
10. Kidney Disease: Improving Global Outcomes (KDIGO). Kdigo 2012 Clinical Practice Guideline for the Evaluation and Management of Chronic Kidney Disease. *Kidney Int Suppl* 2013;3:1-150.
11. National Health and Nutrition Examination Survey. May 28, 2020. (Accessed June 1, 2020, at <https://www.cdc.gov/nchs/nhanes/index.htm>.)
12. Soveri I, Berg UB, Bjork J, et al. Measuring Gfr: A Systematic Review. *Am J Kidney Dis* 2014;64:411-24.
13. Seegmiller JC, Burns BE, Schinstock CA, Lieske JC, Larson TS. Discordance between Iothalamate and Iohexol Urinary Clearances. *Am J Kidney Dis* 2016;67:49-55.
14. Levey AS, Inker LA. Gfr as the "Gold Standard": Estimated, Measured, and True. *Am J Kidney Dis* 2016;67:9-12.
15. Inker LA, Levey AS, Tighiouart H, et al. Performance of Glomerular Filtration Rate Estimating Equations in a Community-Based Sample of Blacks and Whites: The Multiethnic Study of Atherosclerosis. *Nephrol Dial Transplant* 2017.
16. Pottel H, Hoste L, Dubourg L, et al. An Estimated Glomerular Filtration Rate Equation for the Full Age Spectrum. *Nephrol Dial Transplant* 2016;31:798-806.
17. Bjork J, Grubb A, Sterner G, Nyman U. Revised Equations for Estimating Glomerular Filtration Rate Based on the Lund-Malmo Study Cohort. *Scand J Clin Lab Invest* 2011;71:232-9.
18. Pottel H, Bjork J, Courbebaisse M, et al. Development and Validation of a Modified Full Age Spectrum Creatinine-Based Equation to Estimate Glomerular Filtration Rate : A Cross-Sectional Analysis of Pooled Data. *Ann Intern Med* 2021;174:183-91.
19. Grubb A, Horio M, Hansson LO, et al. Generation of a New Cystatin C-Based Estimating Equation for Glomerular Filtration Rate by Use of 7 Assays Standardized to the International Calibrator. *Clin Chem* 2014;60:974-86.

20. Pottel H, Delanaye P, Schaeffner E, et al. Estimating Glomerular Filtration Rate for the Full Age Spectrum from Serum Creatinine and Cystatin C. *Nephrol Dial Transplant* 2017;32:497-507.
21. 2001-2002 Data Documentation, Codebook, and Frequencies; Cystatin C (Surplus) (Sscyst\_B). US Department of Health and Human Services. 2021, at [https://wwwn.cdc.gov/Nchs/Nhanes/2001-2002/SSCYST\\_B.htm](https://wwwn.cdc.gov/Nchs/Nhanes/2001-2002/SSCYST_B.htm).)
22. 1999-2000 Data Documentation, Codebook, and Frequencies; Cystatin C - Serum (Surplus) (Sscyst\_a). 2021, at [https://wwwn.cdc.gov/nchs/nhanes/1999-2000/SSCYST\\_A.htm](https://wwwn.cdc.gov/nchs/nhanes/1999-2000/SSCYST_A.htm).)
23. Coresh J, Selvin E, Stevens LA, et al. Prevalence of Chronic Kidney Disease in the United States. *JAMA* 2007;298:2038-47.
24. Kottgen A, Selvin E, Stevens LA, Levey AS, Van Lente F, Coresh J. Serum Cystatin C in the United States: The Third National Health and Nutrition Examination Survey (Nhanes Iii). *Am J Kidney Dis* 2008;51:385-94.
25. Grams ME, Juraschek SP, Selvin E, et al. Trends in the Prevalence of Reduced Gfr in the United States: A Comparison of Creatinine- and Cystatin C-Based Estimates. *Am J Kidney Dis* 2013;62:253-60.
26. Selvin E, Juraschek SP, Eckfeldt J, Levey AS, Inker LA, Coresh J. Calibration of Cystatin C in the National Health and Nutrition Examination Surveys (Nhanes). *Am J Kidney Dis* 2013;61:353-4.
27. Selvin E, Manzi J, Stevens LA, et al. Calibration of Serum Creatinine in the National Health and Nutrition Examination Surveys (Nhanes) 1988-1994, 1999-2004. *Am J Kidney Dis* 2007;50:918-26.
28. Coresh J, Astor B, Greene T, Eknoyan G, Levey A. Prevalence of Chronic Kidney Disease and Decreased Kidney Function in the Adult Us Population: Third National Health and Nutrition Examination Survey. *Am J Kidney Dis* 2003;41:1-12.
29. National Kidney Foundation. K/Doqi Clinical Practice Guidelines for Chronic Kidney Disease: Evaluation, Classification, and Stratification. *Am J Kidney Dis* 2002;39:S1-266.
30. Centers for Disease Control and Prevention: National Health and Nutrition Examination Survey (Nhanes). US Department of Health and Human Services. (Accessed January 11, 2007, at <http://www.cdc.gov/nchs/nhanes.htm>.)
31. National Center for Health Statistics: National Health and Nutrition Examination Survey (Nhanes)-Analytic Guidelines. US Department of Health and Human Services. (Accessed May 9, 2007, at [http://www.cdc.gov/nchs/about/major/nhanes/nhanes2003-2004/analytical\\_guidelines.htm](http://www.cdc.gov/nchs/about/major/nhanes/nhanes2003-2004/analytical_guidelines.htm).)
32. Analytic and Reporting Guidelines: The Third National Health and Nutrition Examination Survey, Nhanes Iii (1988-94). National Center for Health Statistics: Centers for Disease Control and Prevention. (Accessed September 25, 2007, at <http://www.cdc.gov/nchs/data/nhanes/nhanes3/nh3gui.pdf>.)
33. Lewis J, Agodoa L, Cheek D, et al. Comparison of Cross-Sectional Renal Function Measurements in African Americans with Hypertensive Nephrosclerosis and of Primary Formulas to Estimate Glomerular Filtration Rate. *Am J Kidney Dis* 2001;38:744-53.
34. Modification of Diet in Renal Disease (MDRD) Study Group (prepared by Levey AS; Bosch JP; Lewis JB; Greene T; Rogers N; Roth D). A More Accurate Method to Estimate Glomerular Filtration Rate from Serum Creatinine: A New Prediction Equation. *Modification of Diet in Renal Disease Study Group. Ann Intern Med* 1999;130:461-70.
35. Ibrahim H, Mondress M, Tello A, Fan Y, Koopmeiners J, Thomas W. An Alternative Formula to the Cockcroft-Gault and the Modification of Diet in Renal Diseases Formulas in Predicting Gfr in Individuals with Type 1 Diabetes. *J Am Soc Nephrol* 2005;16:1051-60.
36. Nelson RG, Bennett PH, Beck GJ, et al. Development and Progression of Renal Disease in Pima Indians with Non-Insulin-Dependent Diabetes Mellitus. *Diabetic Renal Disease Study Group. New England Journal Medicine* 1996;335:1636-42.
37. Lewis EJ, Hunsicker LG, Bain RP, Rohde RD. The Effect of Angiotensin-Converting-Enzyme Inhibition on Diabetic Nephropathy. The Collaborative Study Group. *N Engl J Med* 1993;329:1456-62.

38. Feldman HI, Appel LJ, Chertow GM, et al. The Chronic Renal Insufficiency Cohort (Cric) Study: Design and Methods. *J Am Soc Nephrol* 2003;14:S148-53.
39. Poggio ED, Wang X, Greene T, Van Lente F, Hall PM. Performance of the Modification of Diet in Renal Disease and Cockcroft-Gault Equations in the Estimation of Gfr in Health and in Chronic Kidney Disease. *J Am Soc Nephrol* 2005;16:459-66.
40. Rule AD, Larson TS, Bergstralh EJ, Slezak JM, Jacobsen SJ, Cosio FG. Using Serum Creatinine to Estimate Glomerular Filtration Rate: Accuracy in Good Health and in Chronic Kidney Disease. *Ann Intern Med* 2004;141:929-37.
41. Chapman AB, Guay-Woodford LM, Grantham JJ, et al. Renal Structure in Early Autosomal-Dominant Polycystic Kidney Disease (Adpkd): The Consortium for Radiologic Imaging Studies of Polycystic Kidney Disease (Crisp) Cohort. *Kidney Int* 2003;64:1035-45.
42. Bosma RJ, Doorenbos CR, Stegeman CA, van der Heide JJ, Navis G. Predictive Performance of Renal Function Equations in Renal Transplant Recipients: An Analysis of Patient Factors in Bias. *Am J Transplant* 2005;5:2193-203.
43. Mauer M, Zinman B, Gardiner R, et al. Ace-I and Arbs in Early Diabetic Nephropathy. *J Renin Angiotensin Aldosterone Syst* 2002;3:262-9.
44. Inker LA, Okparavero A, Tighiouart H, et al. Midlife Blood Pressure and Late-Life Gfr and Albuminuria: An Elderly General Population Cohort. *Am J Kidney Dis* 2015. doi:10.1053/j.ajkd.2015.03.030.
45. Hansen HP, Tauber-Lassen E, Jensen BR, Parving HH. Effect of Dietary Protein Restriction on Prognosis in Patients with Diabetic Nephropathy. *Kidney Int* 2002;62:220-8.
46. Jacobsen P, Andersen S, Rossing K, Jensen BR, Parving HH. Dual Blockade of the Renin-Angiotensin System Versus Maximal Recommended Dose of Ace Inhibition in Diabetic Nephropathy. *Kidney Int* 2003;63:1874-80.
47. Jacobsen P, Andersen S, Rossing K, Hansen BV, Parving HH. Dual Blockade of the Renin-Angiotensin System in Type 1 Patients with Diabetic Nephropathy. *Nephrol Dial Transplant* 2002;17:1019-24.
48. Mathiesen ER, Hommel E, Giese J, Parving HH. Efficacy of Captopril in Postponing Nephropathy in Normotensive Insulin Dependent Diabetic Patients with Microalbuminuria. *Brit Med J* 1991;303:81-7.
49. Grubb A, Nyman U, Bjork J, et al. Simple Cystatin C-Based Prediction Equations for Glomerular Filtration Rate Compared with the Modification of Diet in Renal Disease Prediction Equation for Adults and the Schwartz and the Counahan-Barratt Prediction Equations for Children. *Clin Chem* 2005;51:1420-31.
50. Inker LA, Wyatt C, Creamer R, et al. Performance of Creatinine and Cystatin C Gfr Estimating Equations in an Hiv-Positive Population on Antiretrovirals. *J Acquir Immune Defic Syndr* 2012;61:302-9.
51. Kaslow RA, Ostrow DG, Detels R, Phair JP, Polk BF, Rinaldo CR, Jr. The Multicenter Aids Cohort Study: Rationale, Organization, and Selected Characteristics of the Participants. *Am J Epidemiol* 1987;126:310-8.
52. Afkarian M, Polsky S, Parsa A, et al. Preventing Early Renal Loss in Diabetes (Perl) Study: A Randomized Double-Blinded Trial of Allopurinol-Rationale, Design, and Baseline Data. *Diabetes Care* 2019;42:1454-63.
53. Inker LA, Shafi T, Okparavero A, et al. Effects of Race and Sex on Measured Gfr: The Multi-Ethnic Study of Atherosclerosis. *Am J Kidney Dis* 2016;68:743-51.
54. Kasiske BL, Anderson-Haag T, Israni AK, et al. A Prospective Controlled Study of Living Kidney Donors: Three-Year Follow-Up. *Am J Kidney Dis* 2015;66:114-24.
55. Froissart M, Rossert J, Jacquot C, Paillard M, Houillier P. Predictive Performance of the Modification of Diet in Renal Disease and Cockcroft-Gault Equations for Estimating Renal Function. *J Am Soc Nephrol* 2005;16:763-73.

56. Rook M, Hofker HS, van Son WJ, van der Heide J, Ploeg R, Navis G. Predictive Capacity of Pre-Donation Gfr and Renal Reserve Capacity for Donor Renal Function after Living Kidney Donation. *Am J Trans* 2006;6:1653-9.
57. Gonwa TA, Jennings L, Mai ML, Stark PC, Levey AS, Klintmalm GB. Estimation of Glomerular Filtration Rates before and after Orthotopic Liver Transplantation: Evaluation of Current Equations. *Liver Transpl* 2004;10:301-9.
58. Mauer M, Drummond K. The Early Natural History of Nephropathy in Type 1 Diabetes: I. Study Design and Baseline Characteristics of the Study Participants. *Diabetes* 2002;51:1572-9.
